# Supplementary material
Source: PubMed Central journal article supplement (PMC8724283)
Supplement: 41422_2021_595_MOESM1_ESM.pdf [file 41422_2021_595_MOESM1_ESM.pdf]

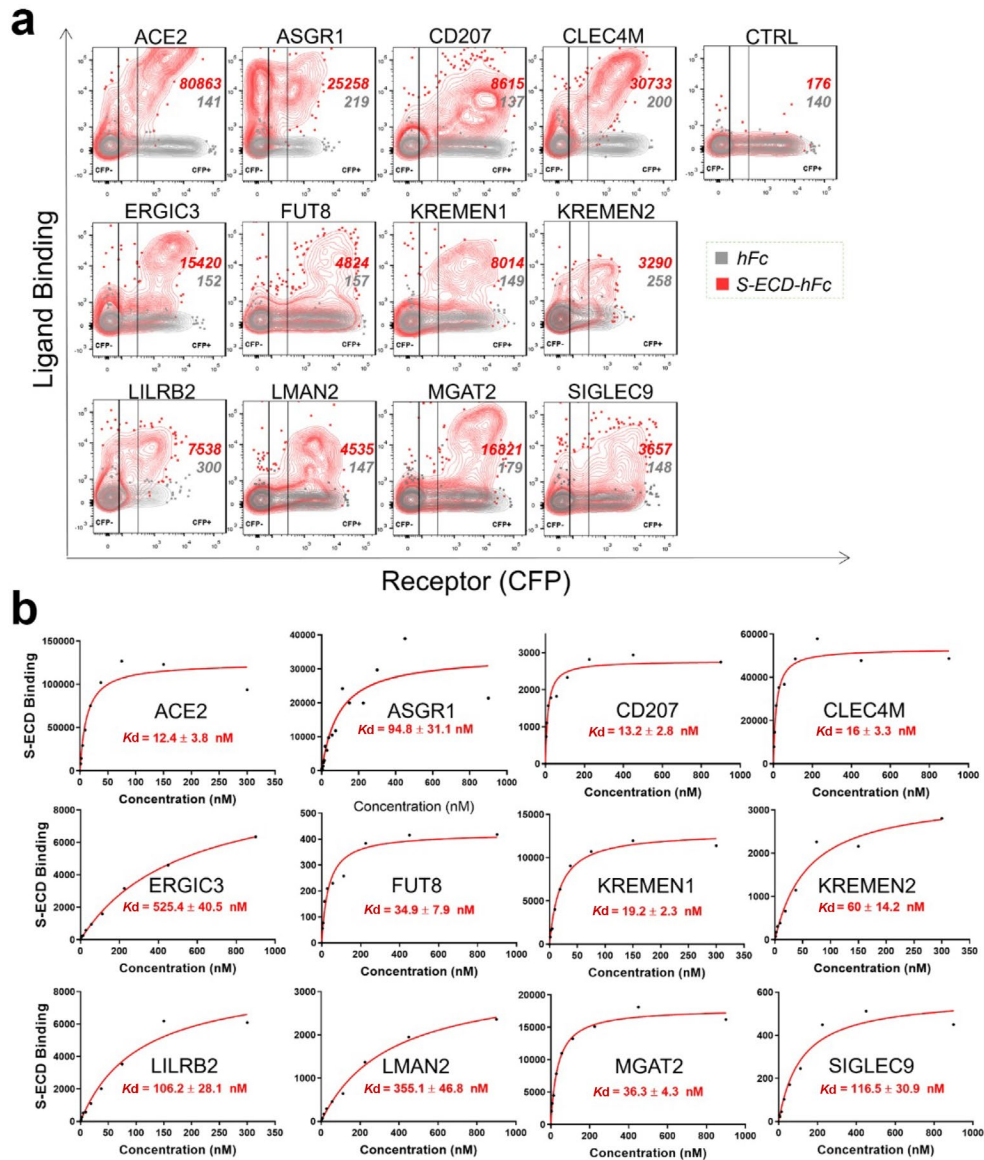

**Fig. S1. Binding of S-ECD with the identified receptor-like host factors.**

**a**, Plasmids encoding the indicated factors were individually co-transfected with CFP reporter into HEK293E cells. The cells were incubated with SARS-CoV-2 S-ECD-hFc protein or hFc control protein, and then labelled by Anti-hFc-APC antibody. Binding was measured by flow cytometry and shown with Mean Fluorescent Intensity (MFI) of APC fluorescence. **b**,  $K_d$  of the S-ECD interaction with the identified factors. HEK293E cells expressing the indicated factors were incubated with serially diluted concentrations of SARS-CoV2 S-ECD-hFc. S-ECD binding was monitored by flow cytometry to determine  $K_d$ .
