# Supplementary material
Source: PubMed Central journal article supplement (PMC8724283)
Supplement: 41422_2021_595_MOESM2_ESM.pdf [file 41422_2021_595_MOESM2_ESM.pdf]

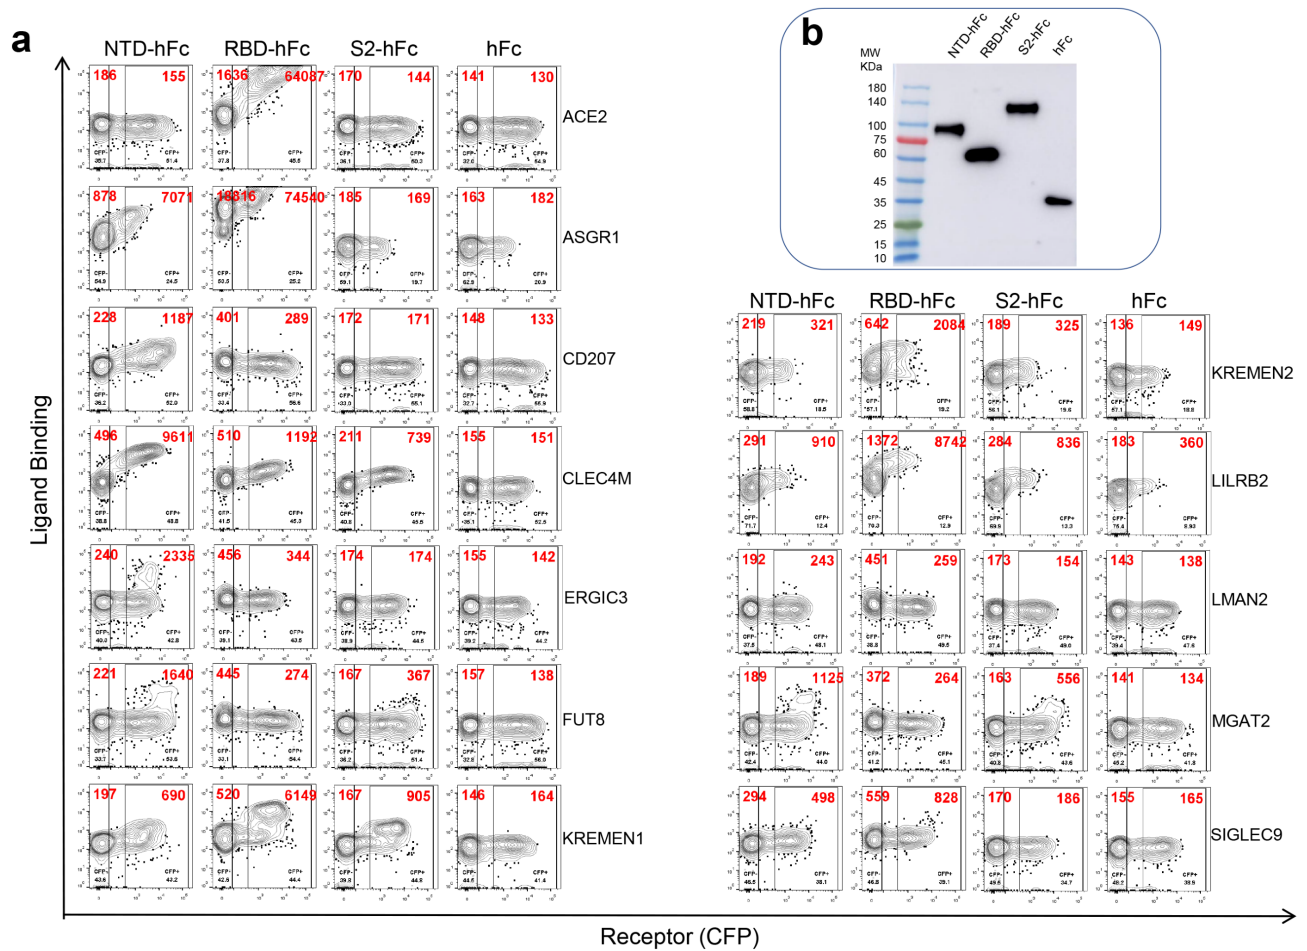

**Fig. S2. Binding of the identified host factors with SARS-CoV-2 spike domains.**

HEK293E cells expressing the indicated factors were incubated with NTD-hFc, RBD-hFc, S2-hFc or hFc control separately, ligand binding was measured by flow cytometry (**a**), western blot with anti-hFc antibody showing the ligand proteins used in this assay (**b**).
