# Supplementary material
Source: PubMed Central journal article supplement (PMC8724283)
Supplement: 41422_2021_595_MOESM6_ESM.pdf [file 41422_2021_595_MOESM6_ESM.pdf]

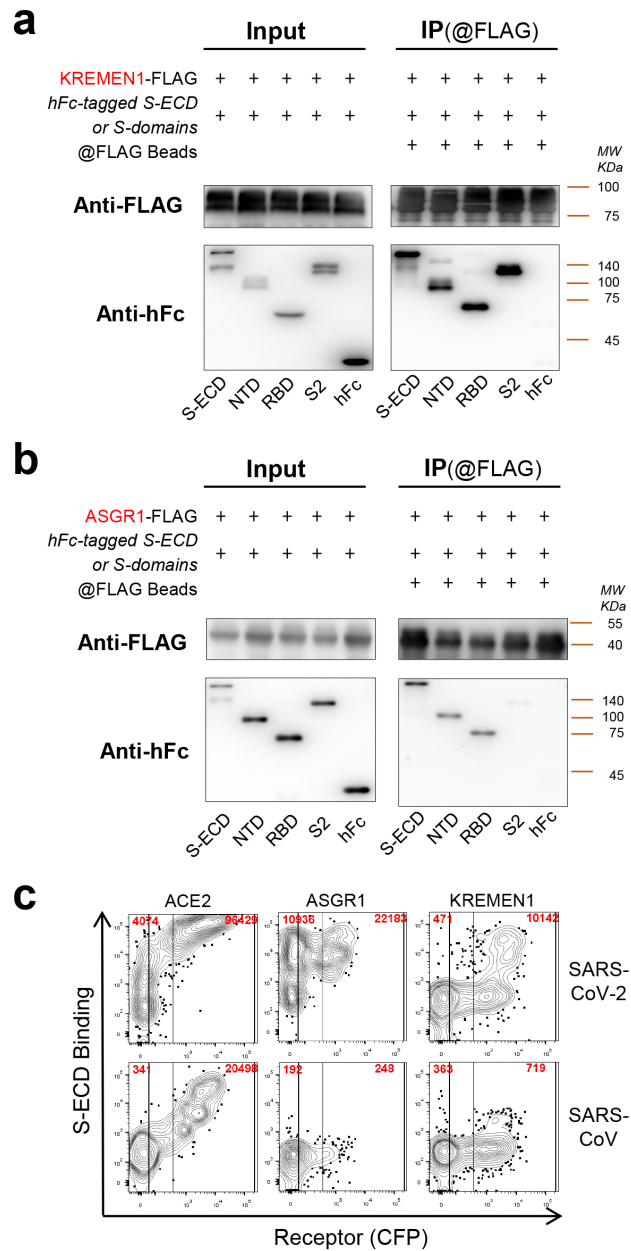

**Fig. S6. KREMEN1 and ASGR1 as receptors of SARS-CoV-2 but not SARS-CoV.**

**a and b**, Co-immunoprecipitation to detect the interaction of full-length KREMEN1 (**a**) or ASGR1 (**b**) with S-ECD, NTD, RBD or S2 domains respectively. **c**, KREMEN1, ASGR1 or ACE2 expressing HEK293E cells were incubated with S-ECD-hFc (10 $\mu$ g/ml final concentration) of SARS-CoV2 or SARS-CoV separately. S-ECD binding were monitored by flow cytometry.
