# Supplementary material
Source: PubMed Central journal article supplement (PMC8724283)
Supplement: 41422_2021_595_MOESM8_ESM.pdf [file 41422_2021_595_MOESM8_ESM.pdf]

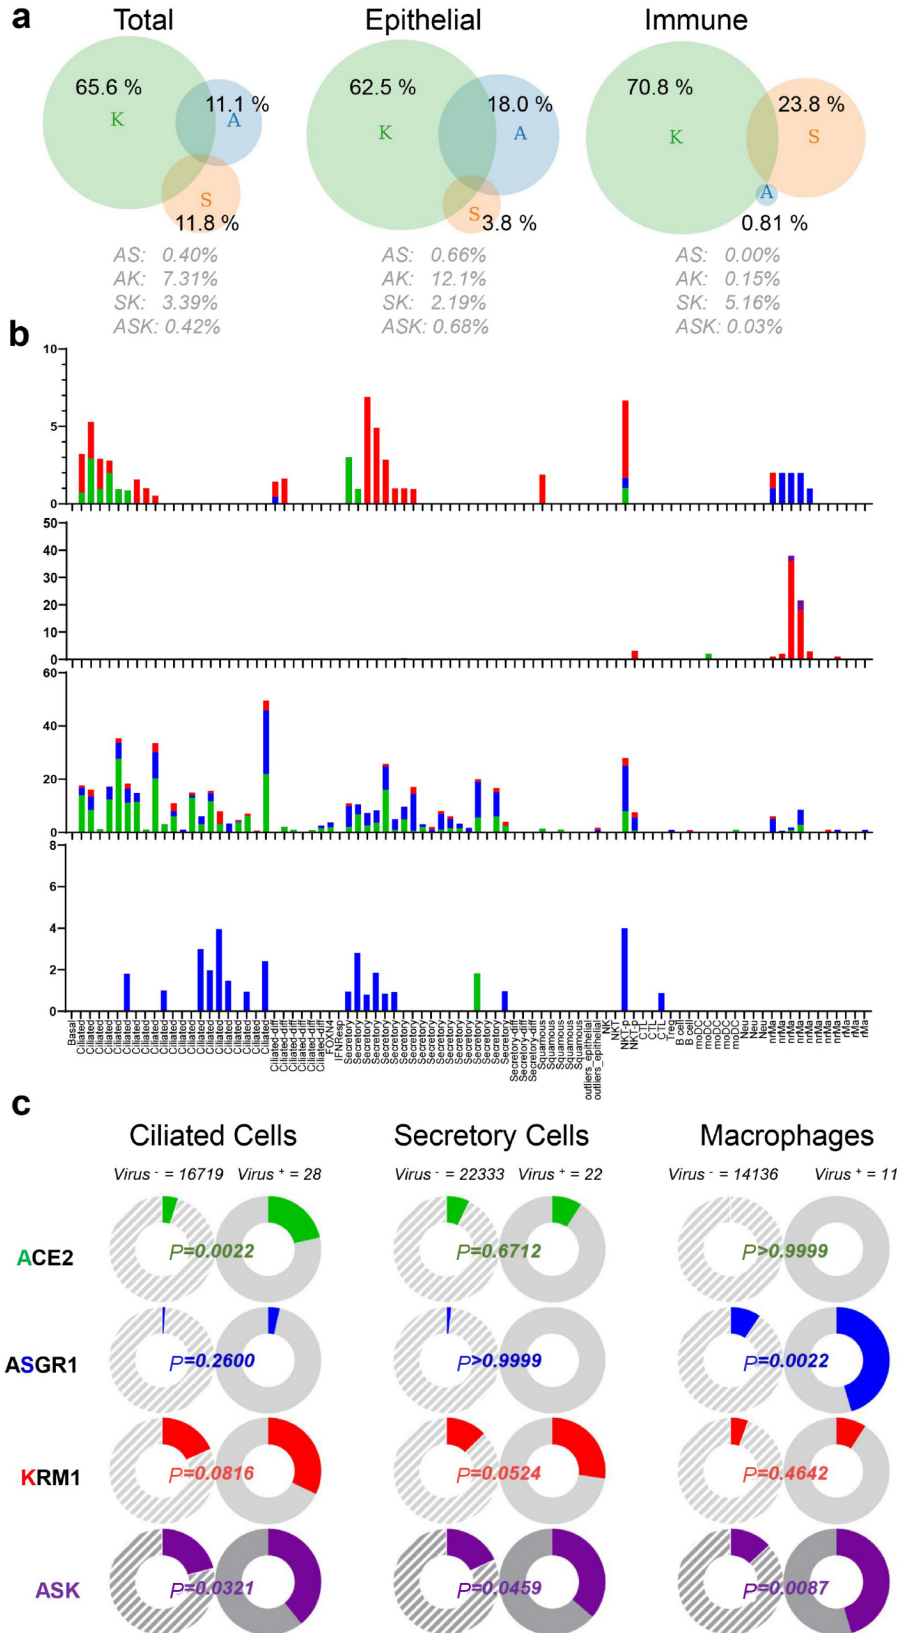

**Fig. S8. ASK receptors in the upper respiratory tract of patients with COVID-19.**

**a**, In ASK (ACE2/ASGR1/KREMEN1) receptor positive cells of total population, or epithelial and immune subpopulations of the upper respiratory tract with COVID-19, percentage of cells that expressing the indicated receptor(s) only were shown as venn diagram. **b**, Expression of the twelve S-binding host factors in SARS-CoV-2 positive cells derived from the upper respiratory tracts with COVID-19. **c**, In the epithelial ciliated and secretory cells, and immune macrophages of the upper respiratory tract with COVID-19, correlation of virus susceptibility with ASK receptors individually or in combination based on receptor positive cell percentage were determined. Virus positive and negative cell numbers were shown. *P*-Values were calculated by two-sided Chi-square test.
