# Supplementary material
Source: PubMed Central journal article supplement (PMC8724283)
Supplement: 41422_2021_595_MOESM9_ESM.pdf [file 41422_2021_595_MOESM9_ESM.pdf]

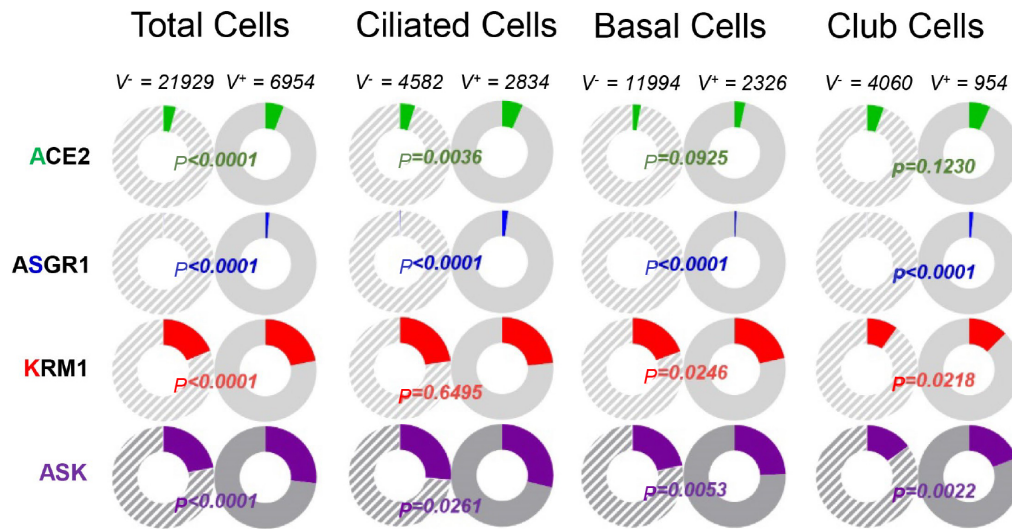

**Fig. S9. Correlation of ASK receptors with SARS-CoV-2 susceptibility in human bronchial epithelium.**

With the single-cell RNA sequencing dataset of SARS-CoV-2 infected human bronchial epithelial cells (HBECs) in air–liquid interface (ALI) cultures at day-3 post infection (Ravindra *et al*, *PLoS Biol*, 2021), correlations of virus susceptibility with ASK receptors individually or in combination were calculated based on the receptor-positive cell percentage in either total cells or cell subpopulations. *P*-values were calculated by unpaired two-sided *Chi*-square tests.
