# Supplementary material
Source: PubMed Central journal article supplement (PMC8724283)
Supplement: 41422_2021_595_MOESM11_ESM.pdf [file 41422_2021_595_MOESM11_ESM.pdf]

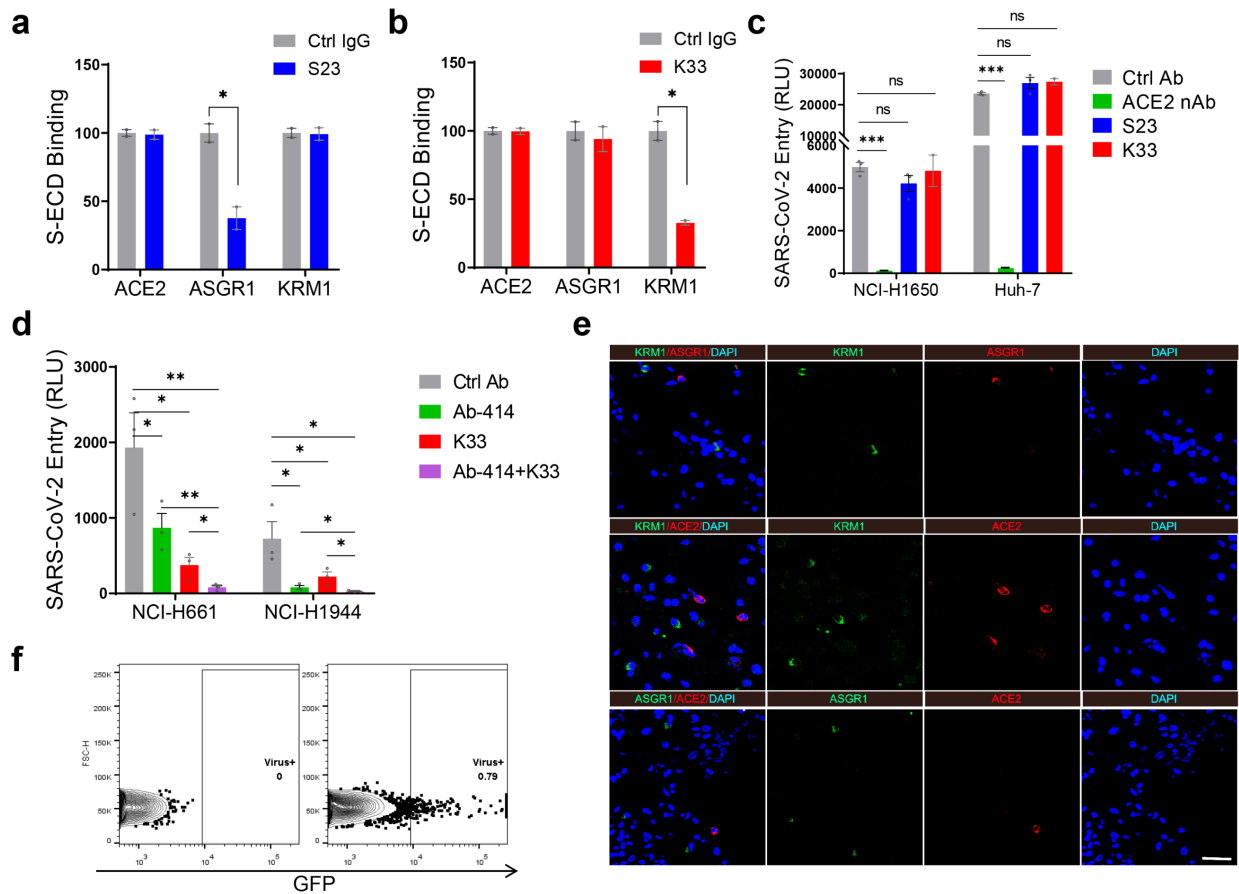

**Fig. S11. Cocktail of ASK-related antibodies substantially blocks SARS-CoV-2 entry.**

**a and b**, KREMEN1, ASGR1 or ACE2 expressed HEK293E cells were incubated with SARS-CoV-2 S-ECD-hFc ( $10\mu\text{g/ml}$  final concentration) in the presence of anti-ASGR1 S23 antibody (**a**) or anti-KREMEN1 K33 antibody (**b**). S-ECD binding relative to control antibody treatment were measured by flow cytometry ( $n=2$ ). **c**, S23 and K33 ( $5\mu\text{g/mL}$  final concentration) do not affect SARS-CoV-2 S-driven entry into ACE2 dependent NCI-H1650 and Huh-7 cells. Luciferase activity was measured 48 hr post-infection ( $n=3$ ). **d**, NCI-H661 and NCI-H1944 were infected with S-pseudotyped SARS-CoV-2 in the presence of Ab-414 and K33 ( $5\mu\text{g/mL}$  final concentration) separately or combined. Luciferase activities were measured 60 hr post-infection (mean  $\pm$  SEM,  $n=3$ ). **e**, Immuno-fluorescence staining showed the expression of ACE2, ASGR1 and KREMEN1 in normal human lung samples (Bar =  $100\mu\text{m}$ ). **f**, Human lung organoids were infected with (right) or without (left) rVSV-GFP/SARS-CoV-2 S chimeric virions (SARS-CoV-2/GFP). GFP<sup>+</sup> cells were measured by flow cytometry 24hr post infection. Data in a-d are present as mean  $\pm$  SEM, unpaired two-tailed Student's *t*-tests, \* $P < 0.05$ , \*\* $P < 0.01$ , \*\*\* $P < 0.001$ .
