# Supplementary material
Source: PubMed Central journal article supplement (PMC8724283)
Supplement: 41422_2021_595_MOESM12_ESM.pdf [file 41422_2021_595_MOESM12_ESM.pdf]

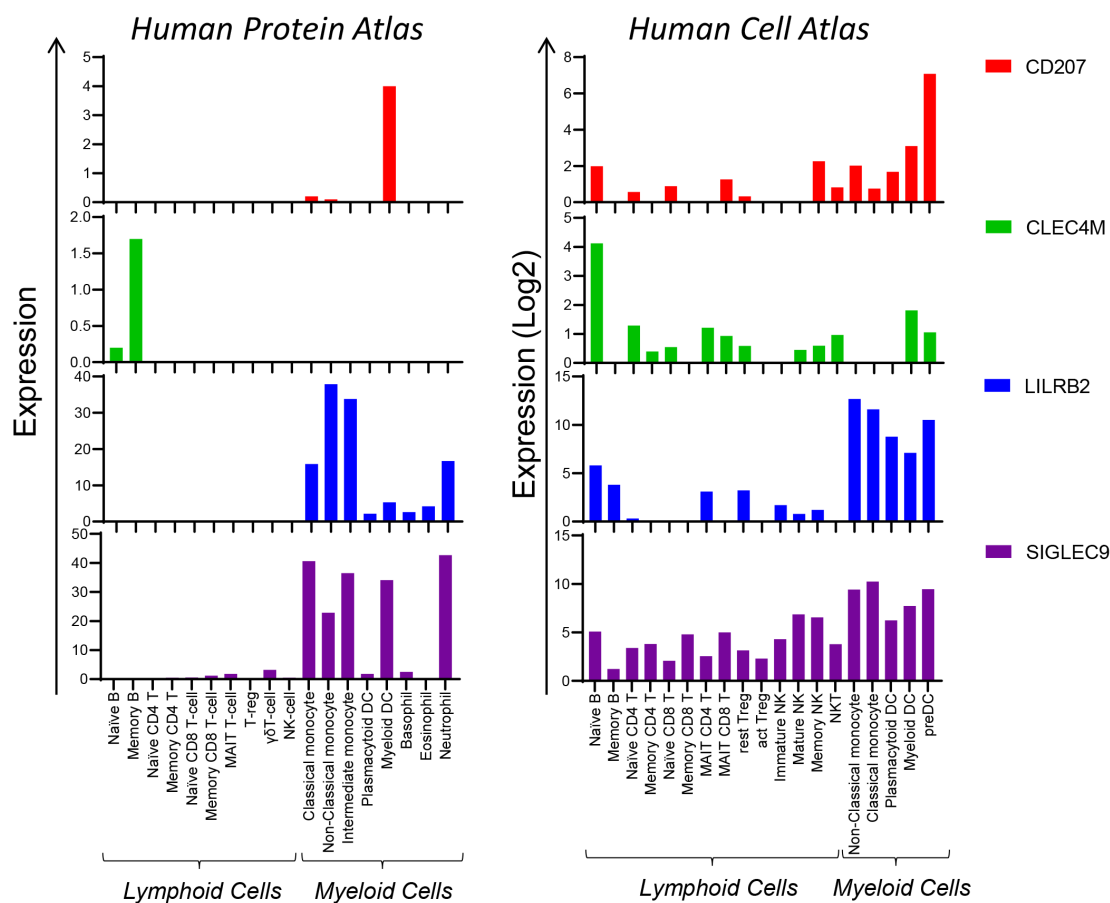

**Fig. S12. Expression of CD207, CLEC4M, LILRB2 and SIGLEC9 in human PBMCs.**

Expression pattern of CD207, CLEC4M, LILRB2 and SIGLEC9 in different cell populations of PBMCs. mRNA expression levels of indicated receptors in different cell population of PBMCs were derived from human Protein Atlas (<https://www.proteinatlas.org/>) and human Cell Atlas (<http://immunecellatlas.net/>).
