# Supplementary material
Source: PubMed Central journal article supplement (PMC8724283)
Supplement: 41422_2021_595_MOESM13_ESM.pdf [file 41422_2021_595_MOESM13_ESM.pdf]

| Gene# | Symbol  | ACCN         | Gene# | Symbol  | ACCN         | Gene# | Symbol    | ACCN         | Gene# | Symbol   | ACCN         |
|-------|---------|--------------|-------|---------|--------------|-------|-----------|--------------|-------|----------|--------------|
| 1     | A4GALT  | NM_017436    | 1265  | DRD4    | NM_000797    | 2528  | LILRB4    | NM_006847    | 3792  | SLC12A7  | BC007760     |
| 2     | AADAC   | NM_001086    | 1266  | DRD4    | NM_000797    | 2529  | LILRB5    | NM_001081442 | 3793  | SLC12A7  | NM_006598    |
| 3     | AADAC   | NM_001086    | 1267  | DRD5    | NM_000798    | 2530  | LILRB5    | NM_001081443 | 3794  | SLC12A9  | NM_020246    |
| 4     | ABCA1   | NM_005502    | 1268  | DSC2    | NM_024422    | 2531  | LIME1     | NM_017806    | 3795  | SLC13A2  | NM_001145975 |
| 5     | ABCA12  | NM_173076    | 1269  | DSC2    | NM_004949    | 2532  | LINGO1    | NM_032808    | 3796  | SLC13A2  | NM_003984    |
| 6     | ABCA5   | NM_172232    | 1270  | DSCAML1 | NM_020693    | 2533  | LMAN1     | NM_005570    | 3797  | SLC13A3  | NM_022829    |
| 7     | ABCA7   | NM_019112    | 1271  | DSE     | NM_013352    | 2534  | LMAN2     | NM_006816    | 3798  | SLC13A4  | NM_012450    |
| 8     | ABCB1   | NM_000927    | 1272  | DSG2    | NM_001943    | 2535  | LMAN2L    | NM_030805    | 3799  | SLC13A5  | NM_177550    |
| 9     | ABCB10  | NM_012089    | 1273  | DUOX1   | NM_017434    | 2536  | LMAN2L    | NM_030805    | 3800  | SLC13A5  | NM_001143838 |
| 10    | ABCB11  | NM_003742    | 1274  | DUOX2   | NM_014080    | 2537  | LMBR1     | NM_022458    | 3801  | SLC14A1  | NM_015865    |
| 11    | ABCB5   | NM_178559    | 1275  | DUOXA1  | NM_144565    | 2538  | LMBR1     | NM_022458    | 3802  | SLC14A2  | NM_007163    |
| 12    | ABCB5   | NM_178559    | 1276  | DUOXA2  | NM_207581    | 2539  | LMBR1L    | NM_018113    | 3803  | SLC14A2  | NM_007163    |
| 13    | ABCB5   | NM_001163941 | 1277  | DYNAP   | NM_173629    | 2540  | LMBRD1    | NM_018368    | 3804  | SLC15A1  | NM_005073    |
| 14    | ABCB6   | NM_005689    | 1278  | DYSF    | NM_003494    | 2541  | LMBRD1    | NM_018368    | 3805  | SLC15A2  | NM_021082    |
| 15    | ABCB7   | NM_004299    | 1279  | EBP     | NM_006579    | 2542  | LMF1      | NM_022773    | 3806  | SLC15A3  | NM_016582    |
| 16    | ABCB8   | NM_007188    | 1280  | EBP     | NM_006579    | 2543  | LMF2      | NM_033200    | 3807  | SLC16A1  | NM_003051    |
| 17    | ABCB9   | BC017348     | 1281  | EBPL    | NM_032565    | 2544  | LMNL      | NM_033029    | 3808  | SLC16A1  | NM_001166496 |
| 18    | ABCC1   | NM_019902    | 1282  | ECE1    | NM_001397    | 2545  | LMTK2     | NM_014916    | 3809  | SLC16A10 | NM_018593    |
| 19    | ABCC1   | NM_004996    | 1283  | ECE1    | NM_001397    | 2546  | LNPEP     | NM_005575    | 3810  | SLC16A11 | NM_153357    |
| 20    | ABCC12  | NM_033226    | 1284  | ECE1    | NM_001397    | 2547  | LOC255620 | XM_173132    | 3811  | SLC16A12 | NM_213606    |
| 21    | ABCC2   | NM_000392    | 1285  | ECE2    | NM_014693    | 2548  | LOC389137 | XM_371655    | 3812  | SLC16A14 | NM_152527    |
| 22    | ABCC3   | NM_003786    | 1286  | ECEL1   | NM_004826    | 2549  | LPAR1     | NM_057159    | 3813  | SLC16A14 | NM_152527    |
| 23    | ABCC3   | NM_001144070 | 1287  | ECM1    | NM_004425    | 2550  | LPAR1     | NM_001403    | 3814  | SLC16A3  | NM_001042422 |
| 24    | ABCC4   | NM_005845    | 1288  | ECM1    | NM_022664    | 2551  | LPAR2     | NM_004720    | 3815  | SLC16A3  | NM_001206950 |
| 25    | ABCC5   | AK090667     | 1289  | EDAR    | NM_022336    | 2552  | LPAR3     | NM_012152    | 3816  | SLC16A3  | NM_004207    |
| 26    | ABCC5   | NM_001023587 | 1290  | EDEM1   | NM_014674    | 2553  | LPAR4     | NM_005296    | 3817  | SLC16A4  | NM_004696    |
| 27    | ABCC5   | NM_005688    | 1291  | EDNRA   | NM_001957    | 2554  | LPAR5     | NM_020400    | 3818  | SLC16A5  | NM_004695    |
| 28    | ABCC6   | NM_001171    | 1292  | EDNRB   | NM_000115    | 2555  | LPAR6     | NM_005767    | 3819  | SLC16A5  | NM_004695    |
| 29    | ABCC8   | NM_001287174 | 1293  | EDNRB   | NM_000115    | 2556  | LPCAT1    | NM_024830    | 3820  | SLC16A6  | NM_004694    |
| 30    | ABCC9   | BC033804     | 1294  | EDNRB   | NM_003991    | 2557  | LPCAT2    | NM_017839    | 3821  | SLC16A7  | NM_001270623 |
| 31    | ABCD3   | NM_002858    | 1295  | EFCAB14 | NM_014774    | 2558  | LPCAT3    | NM_005768    | 3822  | SLC16A7  | NM_004731    |
| 32    | ABCD4   | NM_005050    | 1296  | EFNB1   | NM_004429    | 2559  | LPCAT4    | NM_153613    | 3823  | SLC16A8  | NM_013356    |
| 33    | ABCD4   | NM_020324    | 1297  | EFNB2   | NM_004093    | 2560  | LPGAT1    | NM_014873    | 3824  | SLC16A9  | NM_194298    |
| 34    | ABCD4   | NM_020325    | 1298  | EFNB3   | NM_001406    | 2561  | LRM1      | NM_004744    | 3825  | SLC17A1  | NM_005074    |
| 35    | ABCG1   | NM_004915    | 1299  | EGF     | NM_001963    | 2562  | LRCH4     | NM_002319    | 3826  | SLC17A2  | NM_005835    |
| 36    | ABCG1   | NM_207628    | 1300  | EGFLAM  | NM_182799    | 2563  | LRCH4     | BC018529     | 3827  | SLC17A3  | NM_006632    |
| 37    | ABCG2   | NM_004827    | 1301  | EGFLAM  | NM_182801    | 2564  | LRFN4     | NM_024036    | 3828  | SLC17A3  | NM_001098486 |
| 38    | ABCG2   | NM_004827    | 1302  | EGFR    | NM_005228    | 2565  | LRFN4     | NM_024036    | 3829  | SLC17A4  | NM_005495    |
| 39    | ABCG4   | NM_022169    | 1303  | EGFR    | NM_201283    | 2566  | LRFN5     | NM_152447    | 3830  | SLC17A4  | NM_001286121 |
| 40    | ABCG5   | NM_022436    | 1304  | EI24    | NM_001007277 | 2567  | LRIG1     | NM_015541    | 3831  | SLC17A5  | NM_012434    |
| 41    | ABCG8   | NM_022437    | 1305  | EI24    | NM_004879    | 2568  | LRIG3     | NM_153377    | 3832  | SLC17A5  | NM_012434    |
| 42    | ABHD1   | NM_032604    | 1306  | EIF2AK3 | NM_004836    | 2569  | LRMP      | NM_006152    | 3833  | SLC17A6  | NM_020346    |
| 43    | ABHD12  | NM_001042472 | 1307  | EIF2AK3 | NM_004836    | 2570  | LRP10     | NM_014045    | 3834  | SLC17A7  | NM_020309    |
| 44    | ABHD13  | NM_032859    | 1308  | ELANE   | NM_001972    | 2571  | LRP11     | NM_032832    | 3835  | SLC17A9  | NM_022082    |
| 45    | ABHD16A | NM_021160    | 1309  | ELN     | NM_000501    | 2572  | LRP12     | NM_013437    | 3836  | SLC18A1  | NM_003053    |
| 46    | ABHD3   | NM_138340    | 1310  | ELOVL1  | NM_022821    | 2573  | LRP3      | NM_002333    | 3837  | SLC18A2  | NM_003054    |
| 47    | ABHD6   | NM_020676    | 1311  | ELOVL1  | NM_001256401 | 2574  | LRP4      | NM_002334    | 3838  | SLC18A3  | NM_003055    |
| 48    | ABI3BP  | NM_015429    | 1312  | ELOVL2  | NM_017770    | 2575  | LRP5      | NM_002335    | 3839  | SLC19A1  | BC003068     |
| 49    | ACACB   | NM_001093    | 1313  | ELOVL3  | NM_152310    | 2576  | LRP6      | NM_002336    | 3840  | SLC19A2  | NM_006996    |
| 50    | ACACB   | NM_001093    | 1314  | ELOVL4  | NM_022726    | 2577  | LRP8      | NM_017522    | 3841  | SLC19A3  | NM_025243    |
| 51    | ACBD4   | NM_024722    | 1315  | ELOVL5  | NM_021814    | 2578  | LRP8      | NM_017522    | 3842  | SLC19A3  | NM_025243    |
| 52    | ACBD5   | NM_145698    | 1316  | ELOVL6  | NM_024090    | 2579  | LRP8      | NM_001018054 | 3843  | SLC1A1   | NM_004170    |
| 53    | ACE     | NM_000789    | 1317  | ELOVL6  | NM_001130721 | 2580  | LRP8      | NM_004631    | 3844  | SLC1A2   | AK090810     |
| 54    | ACE2    | NM_021804    | 1318  | ELOVL7  | NM_024930    | 2581  | LRP8      | NM_033300    | 3845  | SLC1A2   | NM_004171    |
| 55    | ACER3   | NM_018367    | 1319  | ELOVL7  | NM_001104558 | 2582  | LRPAP1    | NM_002337    | 3846  | SLC1A2   | NM_004171    |
| 56    | ACKR1   | NM_002036    | 1320  | ELOVL7  | XM_041701    | 2583  | LRRC15    | NM_130830    | 3847  | SLC1A3   | NM_004172    |
| 57    | ACKR1   | NM_002036    | 1321  | EMB     | NM_198449    | 2584  | LRRC15    | NM_001135057 | 3848  | SLC1A4   | AL833067     |
| 58    | ACKR1   | NM_001122951 | 1322  | EMC10   | NM_175063    | 2585  | LRRC19    | NM_022901    | 3849  | SLC1A4   | NM_003038    |
| 59    | ACKR2   | NM_001296    | 1323  | EMC10   | XM_058990    | 2586  | LRRC24    | NM_001024678 | 3850  | SLC1A5   | NM_005628    |
| 60    | ACKR3   | NM_020311    | 1324  | EMC3    | NM_018447    | 2587  | LRRC25    | NM_145256    | 3851  | SLC1A6   | NM_005071    |
| 61    | ACKR4   | NM_016557    | 1325  | EMC3    | NM_018447    | 2588  | LRRC25    | NM_145256    | 3852  | SLC1A7   | NM_006671    |
| 62    | ACKR4   | NM_178445    | 1326  | EMC4    | NM_016454    | 2589  | LRRC26    | NM_001013653 | 3853  | SLC20A1  | NM_005415    |
| 63    | ACMSD   | NM_138326    | 1327  | EMC6    | NM_031298    | 2590  | LRRC32    | NM_005512    | 3854  | SLC20A1  | NM_005415    |
| 64    | ACMSD   | NM_138326    | 1328  | EMC7    | NM_020154    | 2591  | LRRC3B    | NM_052953    | 3855  | SLC20A2  | NM_006749    |
| 65    | ACP1    | NM_007099    | 1329  | EMCN    | NM_016242    | 2592  | LRRC4     | NM_022143    | 3856  | SLC22A1  | NM_153187    |
| 66    | ACP1    | BC020699     | 1330  | EMD     | NM_000117    | 2593  | LRRC59    | NM_018509    | 3857  | SLC22A1  | NM_003057    |
| 67    | ACP1    | NM_007099    | 1331  | EML2    | NM_012155    | 2594  | LRRC8A    | NM_019594    | 3858  | SLC22A10 | NM_001039752 |
| 68    | ACP1    | NM_004300    | 1332  | EMP1    | NM_001423    | 2595  | LRRC8A    | NM_001127244 | 3859  | SLC22A11 | NM_018484    |
| 69    | ACP1    | NM_004300    | 1333  | EMP2    | NM_001424    | 2596  | LRRC8B    | NM_015350    | 3860  | SLC22A11 | NM_018484    |
| 70    | ACP1    | NM_004300    | 1334  | EMP3    | NM_001425    | 2597  | LRRC8C    | NM_032270    | 3861  | SLC22A11 | XM_170856    |
| 71    | ACP2    | NM_001610    | 1335  | EMR1    | BC059395     | 2598  | LRRC8D    | NM_018103    | 3862  | SLC22A12 | NM_144585    |
| 72    | ACPP    | NM_001134194 | 1336  | ENG     | NM_000118    | 2599  | LRRC8D    | BC009486     | 3863  | SLC22A13 | BC035973     |
| 73    | ACPP    | NM_001099    | 1337  | ENHO    | NM_198573    | 2600  | LRRC8E    | NM_025061    | 3864  | SLC22A13 | NM_004256    |
| 74    | ACSL1   | NM_001195    | 1338  | ENPEP   | NM_001977    | 2601  | LRRN1     | NM_020873    | 3865  | SLC22A14 | NM_004803    |
| 75    | ACSL3   | NM_004457    | 1339  | ENPP1   | NM_006208    | 2602  | LRRN3     | NM_018334    | 3866  | SLC22A15 | NM_018420    |
| 76    | ACSL3   | NM_203372    | 1340  | ENPP2   | NM_006209    | 2603  | LRRN4     | NM_152611    | 3867  | SLC22A17 | NM_020372    |
| 77    | ACSL4   | NM_004458    | 1341  | ENPP2   | NM_001040092 | 2604  | LRRN4     | BC019612     | 3868  | SLC22A17 | NM_020372    |
| 78    | ACSL4   | NM_022977    | 1342  | ENPP2   | NM_001130863 | 2605  | LRRN4CL   | NM_203422    | 3869  | SLC22A18 | NM_183233    |
| 79    | ACSL5   | NM_016234    | 1343  | ENPP3   | NM_005021    | 2606  | LRRTM1    | NM_178839    | 3870  | SLC22A2  | NM_153191    |
| 80    | ACSL5   | NM_203379    | 1344  | ENPP4   | NM_014936    | 2607  | LRRTM1    | NM_178839    | 3871  | SLC22A2  | NM_003058    |
| 81    | ACSL6   | NM_015256    | 1345  | ENPP5   | NM_021572    | 2608  | LRRTM2    | NM_015564    | 3872  | SLC22A25 | NM_199352    |
| 82    | ACVR1   | NM_001105    | 1346  | ENTPD1  | NM_001776    | 2609  | LRRTM3    | NM_178011    | 3873  | SLC22A3  | NM_021977    |
| 83    | ACVR1   | NM_001105    | 1347  | ENTPD1  | NM_001098175 | 2610  | LRRTM4    | NM_024993    | 3874  | SLC22A4  | NM_003059    |
| 84    | ACVR1B  | NM_004302    | 1348  | ENTPD2  | NM_203468    | 2611  | LRTM1     | NM_020678    | 3875  | SLC22A5  | NM_003060    |
| 85    | ACVR1B  | NM_004302    | 1349  | ENTPD3  | NM_001291960 | 2612  | LSAMP     | NM_002338    | 3876  | SLC22A5  | NM_003060    |
| 86    | ACVR1C  | NM_145259    | 1350  | ENTPD3  | NM_001248    | 2613  | LSMEM1    | NM_182597    | 3877  | SLC22A6  | NM_153278    |
| 87    | ACVR1C  | NM_145259    | 1351  | ENTPD4  | NM_004901    | 2614  | LSMEM2    | NM_153215    | 3878  | SLC22A6  | NM_153276    |
| 88    | ACVR1C  | NM_145259    | 1352  | ENTPD5  | NM_001249    | 2615  | LSR       | BC004381     | 3879  | SLC22A6  | NM_004790    |
| 89    | ACVR2A  | NM_001616    | 1353  | ENTPD6  | NM_001247    | 2616  | LSR       | NM_205834    | 3880  | SLC22A7  | NM_006672    |
| 90    | ACVR2B  | NM_001106    | 1354  | ENTPD6  | NM_001247    | 2617  | LSR       | NM_205835    | 3881  | SLC22A8  | NM_001184732 |
| 91    | ACVRL1  | NM_000020    | 1355  | ENTPD8  | NM_001033113 | 2618  | LST1      | NM_007161    | 3882  | SLC22A8  | NM_001184733 |
| 92    | ACVRL1  | NM_000020    | 1356  | EPCAM   | NM_002354    | 2619  | LTA       | NM_000595    | 3883  | SLC22A8  | NM_004254    |

|     |           |              |      |        |              |      |          |              |      |          |               |
|-----|-----------|--------------|------|--------|--------------|------|----------|--------------|------|----------|---------------|
| 93  | ADAM10    | NM_001110    | 1357 | EPCAM  | NM_002354    | 2620 | LTA      | NM_001159740 | 3884 | SLC22A9  | NM_080866     |
| 94  | ADAM11    | NM_002390    | 1358 | EPHA1  | NM_005232    | 2621 | LTB      | NM_002341    | 3885 | SLC23A1  | NM_152685     |
| 95  | ADAM12    | NM_021641    | 1359 | EPHA1  | NM_005232    | 2622 | LTB      | NM_002341    | 3886 | SLC23A2  | AK025668      |
| 96  | ADAM12    | NM_003474    | 1360 | EPHA2  | NM_004431    | 2623 | LTB4R    | NM_181657    | 3887 | SLC23A2  | NM_005116     |
| 97  | ADAM15    | NM_003815    | 1361 | EPHA2  | NM_004431    | 2624 | LTB4R2   | NM_019839    | 3888 | SLC23A3  | NM_144712     |
| 98  | ADAM17    | NM_021832    | 1362 | EPHA3  | NM_005233    | 2625 | LTBR     | NM_002342    | 3889 | SLC24A2  | NM_020344     |
| 99  | ADAM17    | NM_003183    | 1363 | EPHA3  | NM_005233    | 2626 | LTC4S    | NM_145867    | 3890 | SLC24A5  | NM_205850     |
| 100 | ADAM19    | NM_023038    | 1364 | EPHA4  | NM_004438    | 2627 | LY6D     | NM_003695    | 3891 | SLC25A17 | NM_006358     |
| 101 | ADAM19    | NM_033274    | 1365 | EPHA4  | NM_004438    | 2628 | LY6K     | NM_001160355 | 3892 | SLC25A18 | NM_031481     |
| 102 | ADAM2     | NM_001464    | 1366 | EPHA5  | NM_004439    | 2629 | LY75     | NM_002349    | 3893 | SLC25A20 | NM_000387     |
| 103 | ADAM22    | NM_021723    | 1367 | EPHA5  | NM_182472    | 2630 | LYPD1    | NM_144586    | 3894 | SLC25A22 | NM_024698     |
| 104 | ADAM23    | NM_003812    | 1368 | EPHA5  | NM_004439    | 2631 | LYPD1    | NM_001077427 | 3895 | SLC25A3  | NM_002635     |
| 105 | ADAM28    | NM_014265    | 1369 | EPHA5  | NM_004439    | 2632 | LYPD6B   | NM_177964    | 3896 | SLC25A3  | NM_213611     |
| 106 | ADAM29    | NM_001130703 | 1370 | EPHA6  | NM_001080448 | 2633 | LYSMD4   | NM_152449    | 3897 | SLC25A3  | NM_002635     |
| 107 | ADAM30    | NM_021794    | 1371 | EPHA7  | NM_004440    | 2634 | LYVE1    | NM_006691    | 3898 | SLC25A3  | NM_005888     |
| 108 | ADAM33    | NM_025220    | 1372 | EPHA7  | NM_004440    | 2635 | LYVE1    | NM_006691    | 3899 | SLC25A31 | NM_031291     |
| 109 | ADAM9     | NM_003816    | 1373 | EPHA7  | NM_004440    | 2636 | M6PR     | NM_002355    | 3900 | SLC25A33 | NM_023215     |
| 110 | ADAM9     | NM_003816    | 1374 | EPHB1  | NM_004441    | 2637 | M6PR     | NM_002355    | 3901 | SLC25A34 | NM_007348     |
| 111 | ADAMTS13  | NM_139025    | 1375 | EPHB1  | NM_004441    | 2638 | MAG      | NM_080600    | 3902 | SLC25A36 | NM_018155     |
| 112 | ADAMTS4   | NM_005099    | 1376 | EPHB2  | NM_017449    | 2639 | MAG      | NM_002361    | 3903 | SLC25A39 | NM_016016     |
| 113 | ADCY1     | BC036858     | 1377 | EPHB3  | NM_004443    | 2640 | MAGEH1   | NM_014061    | 3904 | SLC25A4  | NM_001151     |
| 114 | ADCY1     | NM_021116    | 1378 | EPHB4  | NM_004444    | 2641 | MAGT1    | NM_032121    | 3905 | SLC25A43 | NM_145305     |
| 115 | ADCY2     | XM_097225    | 1379 | EPHB4  | NM_004444    | 2642 | MAL      | NM_022440    | 3906 | SLC25A43 | NM_145305     |
| 116 | ADCY2     | NM_020546    | 1380 | EPHB6  | NM_004445    | 2643 | MAL      | NM_002371    | 3907 | SLC25A5  | NM_001152     |
| 117 | ADCY3     | NM_004036    | 1381 | EPHB6  | NM_004445    | 2644 | MAL      | NM_022438    | 3908 | SLC25A6  | NM_001636     |
| 118 | ADCY4     | NM_139247    | 1382 | EPHX3  | NM_024794    | 2645 | MAL2     | NM_052886    | 3909 | SLC25A6  | NM_001636     |
| 119 | ADCY5     | AK098381     | 1383 | EPHX4  | NM_173567    | 2646 | MALL     | AK056616     | 3910 | SLC26A11 | AK833468      |
| 120 | ADCY5     | XM_171048    | 1384 | EPO    | NM_000799    | 2647 | MALL     | NM_005434    | 3911 | SLC26A11 | NM_173626     |
| 121 | ADCY5     | NM_183357    | 1385 | EPOR   | NM_000121    | 2648 | MAN1A2   | NM_006699    | 3912 | SLC26A2  | NM_000112     |
| 122 | ADCY6     | NM_015270    | 1386 | EPSTI1 | NM_033255    | 2649 | MAN1B1   | NM_016219    | 3913 | SLC26A3  | NM_000111     |
| 123 | ADCY7     | NM_001114    | 1387 | EPSTI1 | NM_001002264 | 2650 | MAN1C1   | NM_020379    | 3914 | SLC26A4  | NM_000441     |
| 124 | ADCY8     | NM_001115    | 1388 | ERBB2  | NM_004448    | 2651 | MAN2A1   | NM_002372    | 3915 | SLC26A5  | NM_198999     |
| 125 | ADCYAP1R1 | NM_001118    | 1389 | ERBB2  | NM_004448    | 2652 | MANBAL   | NM_001003897 | 3916 | SLC26A6  | NM_002291     |
| 126 | ADCYAP1R1 | NM_001199635 | 1390 | ERBB2  | NM_004448    | 2653 | MANBAL   | NM_022077    | 3917 | SLC26A6  | NM_002291     |
| 127 | ADGRA1    | NM_001083909 | 1391 | ERBB2  | NM_001005862 | 2654 | MANBAL   | NM_022077    | 3918 | SLC26A6  | NM_134263     |
| 128 | ADGRA2    | NM_032777    | 1392 | ERBB3  | NM_001005915 | 2655 | MANEA    | NM_024641    | 3919 | SLC26A7  | NM_134266     |
| 129 | ADGRA3    | NM_145290    | 1393 | ERBB3  | NM_001982    | 2656 | MANEA    | AY048775     | 3920 | SLC26A7  | NM_052832     |
| 130 | ADGRB1    | NM_001702    | 1394 | ERBB4  | NM_005235    | 2657 | MANEAL   | NM_001031740 | 3921 | SLC26A8  | NM_138718     |
| 131 | ADGRB3    | NM_001704    | 1395 | ERBB4  | NM_005235    | 2658 | MANEAL   | NM_152496    | 3922 | SLC26A9  | NM_052934     |
| 132 | ADGRD1    | NM_198827    | 1396 | ERBB4  | NM_001042599 | 2659 | MANSC1   | NM_018050    | 3923 | SLC27A1  | NM_198580     |
| 133 | ADGRE1    | NM_001974    | 1397 | EREG   | NM_001432    | 2660 | MANSC1   | BC032998     | 3924 | SLC27A2  | NM_003645     |
| 134 | ADGRE2    | NM_013447    | 1398 | ERGIC1 | NM_001031711 | 2661 | MAOB     | NM_000898    | 3925 | SLC27A3  | NM_024330     |
| 135 | ADGRE5    | NM_078481    | 1399 | ERGIC1 | AK056217     | 2662 | MARCH6   | XM_027156    | 3926 | SLC27A4  | NM_005094     |
| 136 | ADGRE5    | NM_001784    | 1400 | ERGIC3 | NM_015966    | 2663 | MARCHF2  | NM_016496    | 3927 | SLC27A5  | NM_012254     |
| 137 | ADGRE5    | NM_001784    | 1401 | ERGIC3 | NM_198398    | 2664 | MARCHF2  | NM_001005416 | 3928 | SLC28A1  | NM_004213     |
| 138 | ADGRF1    | NM_025048    | 1402 | ERLIN1 | NM_006459    | 2665 | MARCHF2  | NM_016496    | 3929 | SLC28A1  | NM_201651     |
| 139 | ADGRF2    | NM_153839    | 1403 | ERLIN1 | NM_006459    | 2666 | MARCHF5  | NM_017824    | 3930 | SLC28A2  | NM_004212     |
| 140 | ADGRF3    | NM_001145168 | 1404 | ERMAP  | NM_018538    | 2667 | MARCHF9  | NM_138396    | 3931 | SLC28A3  | NM_022127     |
| 141 | ADGRF4    | NM_153838    | 1405 | ERMP1  | NM_024896    | 2668 | MARCO    | NM_006770    | 3932 | SLC29A1  | NM_001078177  |
| 142 | ADGRF5    | NM_015234    | 1406 | ERN1   | NM_001433    | 2669 | MARVELD2 | NM_001038603 | 3933 | SLC29A1  | NM_004955     |
| 143 | ADGRG1    | NM_201525    | 1407 | ERP29  | NM_006817    | 2670 | MAS1     | NM_002377    | 3934 | SLC29A2  | NM_001532     |
| 144 | ADGRG1    | NM_201524    | 1408 | ERVFRD | NM_207582    | 2671 | MAS1L    | NM_052967    | 3935 | SLC29A3  | NM_018344     |
| 145 | ADGRG1    | NM_001145773 | 1409 | ERVW-1 | NM_001130925 | 2672 | MAVS     | NM_020746    | 3936 | SLC29A4  | NM_001040661  |
| 146 | ADGRG2    | NM_005682    | 1410 | ERVW-1 | NM_014590    | 2673 | MBOAT1   | AK056323     | 3937 | SLC29A4  | NM_153247     |
| 147 | ADGRG2    | NM_001079859 | 1411 | ESAM   | NM_138961    | 2674 | MBOAT1   | NM_001080480 | 3938 | SLC2A1   | NM_006616     |
| 148 | ADGRG2    | NM_005756    | 1412 | ESAM   | NM_138961    | 2675 | MBOAT2   | NM_138799    | 3939 | SLC2A10  | NM_030777     |
| 149 | ADGRG2    | NM_001079858 | 1413 | ESYT1  | NM_015292    | 2676 | MBOAT4   | NM_001100916 | 3940 | SLC2A11  | NM_030807     |
| 150 | ADGRG3    | NM_170776    | 1414 | ESYT2  | BC022342     | 2677 | MBOAT7   | NM_024298    | 3941 | SLC2A11  | NM_001024939  |
| 151 | ADGRG3    | NM_170776    | 1415 | ETNK1  | NM_018638    | 2678 | MBOAT7   | NM_024298    | 3942 | SLC2A11  | NM_001024938  |
| 152 | ADGRG4    | NM_153834    | 1416 | ETNK1  | BC006111     | 2679 | MBTPS1   | NM_003791    | 3943 | SLC2A11  | NM_030807     |
| 153 | ADGRG5    | NM_153837    | 1417 | EVA1A  | NM_032181    | 2680 | MBTPS2   | NM_015884    | 3944 | SLC2A12  | NM_145176     |
| 154 | ADGRG6    | NM_001032395 | 1418 | EVA1B  | NM_018166    | 2681 | MC1R     | NM_002386    | 3945 | SLC2A12  | NM_145176     |
| 155 | ADGRG6    | NM_0020455   | 1419 | EVI2A  | NM_014210    | 2682 | MC2R     | NM_000529    | 3946 | SLC2A13  | NM_052885     |
| 156 | ADGRG7    | NM_032787    | 1420 | EVI2A  | NM_014210    | 2683 | MC3R     | NM_019888    | 3947 | SLC2A2   | NM_000340     |
| 157 | ADGRL1    | NM_014921    | 1421 | EVI2B  | NM_006495    | 2684 | MC4R     | NM_005912    | 3948 | SLC2A3   | NM_006931     |
| 158 | ADGRL2    | NM_012302    | 1422 | EVI2B  | NM_006495    | 2685 | MC5R     | NM_005913    | 3949 | SLC2A4   | NM_001042     |
| 159 | ADGRL3    | NM_015236    | 1423 | EXOG   | NM_005107    | 2686 | MCAM     | NM_006500    | 3950 | SLC2A5   | NM_001135585  |
| 160 | ADGRL4    | NM_022159    | 1424 | EXT1   | NM_000127    | 2687 | MCEMP1   | NM_174918    | 3951 | SLC2A5   | NM_003039     |
| 161 | ADGRL4    | NM_022159    | 1425 | EXT1   | NM_000127    | 2688 | MCHR1    | NM_005297    | 3952 | SLC2A6   | NM_017585     |
| 162 | ADIPOR1   | NM_001127687 | 1426 | EXT2   | NM_000401    | 2689 | MCHR1    | BC001736     | 3953 | SLC2A7   | NM_207420     |
| 163 | ADIPOR1   | NM_015999    | 1427 | EXTL1  | NM_004455    | 2690 | MCHR2    | NM_001040179 | 3954 | SLC2A8   | NM_014580     |
| 164 | ADIPOR2   | NM_024551    | 1428 | EXTL2  | NM_001439    | 2691 | MCHR2    | NM_032503    | 3955 | SLC2A9   | NM_0010021290 |
| 165 | ADORA1    | NM_000674    | 1429 | EXTL3  | NM_001440    | 2692 | MCL1     | NM_021960    | 3956 | SLC2A9   | NM_020041     |
| 166 | ADORA2A   | NM_000675    | 1430 | F10    | NM_000504    | 2693 | MCL1     | NM_182763    | 3957 | SLC30A1  | NM_021194     |
| 167 | ADORA2A   | NM_000675    | 1431 | F11R   | NM_144502    | 2694 | MCOLN1   | NM_020533    | 3958 | SLC30A2  | NM_032513     |
| 168 | ADORA2A   | NM_001278497 | 1432 | F11R   | NM_144504    | 2695 | MCOLN2   | NM_153259    | 3959 | SLC30A2  | NM_001004434  |
| 169 | ADORA2B   | NM_000676    | 1433 | F11R   | NM_016946    | 2696 | MCOLN3   | NM_018298    | 3960 | SLC30A2  | NM_032513     |
| 170 | ADORA3    | BC029831     | 1434 | F2R    | BC016059     | 2697 | MCTP1    | BC030005     | 3961 | SLC30A3  | NM_003459     |
| 171 | ADORA3    | NM_000677    | 1435 | F2R    | NM_001992    | 2698 | MCU      | NM_138357    | 3962 | SLC30A4  | NM_013309     |
| 172 | ADRA1A    | NM_000680    | 1436 | F2RL1  | NM_005242    | 2699 | MCUB     | NM_017918    | 3963 | SLC30A5  | NM_024055     |
| 173 | ADRA1B    | NM_000679    | 1437 | F2RL1  | NM_005242    | 2700 | MDK      | NM_001012333 | 3964 | SLC30A5  | NM_022902     |
| 174 | ADRA1D    | NM_000678    | 1438 | F2RL2  | NM_004101    | 2701 | MDK      | NM_002391    | 3965 | SLC30A6  | NM_017964     |
| 175 | ADRA2C    | NM_000683    | 1439 | F2RL3  | NM_003950    | 2702 | MEGF10   | NM_032446    | 3966 | SLC30A8  | NM_173851     |
| 176 | ADRA2C    | NM_000683    | 1440 | F3     | NM_001178096 | 2703 | MEGF11   | NM_032445    | 3967 | SLC30A9  | NM_006345     |
| 177 | ADRB1     | NM_000684    | 1441 | F3     | NM_001993    | 2704 | MEGF8    | NM_001410    | 3968 | SLC30A9  | NM_006345     |
| 178 | ADRB2     | NM_000024    | 1442 | FA2H   | NM_024306    | 2705 | MEP1A    | NM_005588    | 3969 | SLC31A1  | NM_001859     |
| 179 | ADRB3     | NM_000025    | 1443 | FAAH   | NM_001441    | 2706 | MEP1B    | NM_005925    | 3970 | SLC31A2  | NM_001860     |
| 180 | ADTRP     | NM_032744    | 1444 | FAAH2  | NM_174912    | 2707 | MERTK    | NM_006343    | 3971 | SLC32A1  | NM_080552     |
| 181 | AFG3L2    | NM_006796    | 1445 | FADS1  | NM_013402    | 2708 | MERTK    | NM_006343    | 3972 | SLC33A1  | NM_004733     |
| 182 | AGER      | NM_001136    | 1446 | FADS1  | BD127299     | 2709 | MEST     | NM_002402    | 3973 | SLC34A1  | NM_003052     |
| 183 | AGER      | NM_172197    | 1447 | FADS1  | NM_013402    | 2710 | MEST     | NM_177524    | 3974 | SLC34A2  | NM_006424     |
| 184 | AGER      | NM_001206940 | 1448 | FADS2  | NM_004265    | 2711 | MEST     | NM_002402    | 3975 | SLC34A2  | NM_001177998  |
| 185 | AGPAT1    | NM_032741    | 1449 | FADS3  | NM_021727    | 2712 | MEST     | NM_177525    | 3976 | SLC34A3  | NM_080877     |



|     |         |              |      |         |              |      |         |              |      |          |              |
|-----|---------|--------------|------|---------|--------------|------|---------|--------------|------|----------|--------------|
| 186 | AGPAT1  | NM_006411    | 1450 | FAIM2   | NM_012306    | 2713 | MET     | NM_000245    | 3977 | SLC34A3  | NM_001177316 |
| 187 | AGPAT2  | NM_006412    | 1451 | FAM105A | NM_019018    | 2714 | MET     | NM_001127500 | 3978 | SLC35A1  | NM_006416    |
| 188 | AGPAT3  | NM_020132    | 1452 | FAM105A | NM_019018    | 2715 | METTL7A | NM_014033    | 3979 | SLC35A2  | NM_001032289 |
| 189 | AGPAT5  | NM_018361    | 1453 | FAM132A | NM_001014980 | 2716 | METTL7B | NM_152637    | 3980 | SLC35A2  | NM_005660    |
| 190 | AGTR1   | NM_004835    | 1454 | FAM134A | NM_024293    | 2717 | MFAP3   | NM_005927    | 3981 | SLC35A2  | BC035747     |
| 191 | AGTR1   | NM_004835    | 1455 | FAM134B | NM_001034850 | 2718 | MFF     | XM_038373    | 3982 | SLC35A3  | NM_012243    |
| 192 | AGTR1   | NM_031850    | 1456 | FAM134B | NM_019000    | 2719 | MFN2    | NM_001127660 | 3983 | SLC35A4  | NM_080670    |
| 193 | AGTR1   | NM_000685    | 1457 | FAM134B | NM_019000    | 2720 | MFN2    | NM_014874    | 3984 | SLC35A4  | NM_080670    |
| 194 | AGTR1   | NM_009585    | 1458 | FAM151A | BC015993     | 2721 | MFNP    | NM_031433    | 3985 | SLC35A5  | NM_017945    |
| 195 | AGTR2   | NM_000686    | 1459 | FAM151A | NM_176782    | 2722 | MFSD1   | NM_022736    | 3986 | SLC35B1  | NM_005827    |
| 196 | AGTRAP  | NM_001040194 | 1460 | FAM162A | NM_014367    | 2723 | MFSD10  | NM_001120    | 3987 | SLC35B1  | NM_005827    |
| 197 | AGTRAP  | NM_020350    | 1461 | FAM163A | NM_173509    | 2724 | MFSD11  | NM_024311    | 3988 | SLC35B2  | NM_178148    |
| 198 | AIFM1   | NM_145812    | 1462 | FAM171B | NM_177454    | 2725 | MFSD12  | NM_174983    | 3989 | SLC35B2  | NM_178148    |
| 199 | AIFM1   | NM_004208    | 1463 | FAM171B | NM_177454    | 2726 | MFSD14B | NM_032558    | 3990 | SLC35B3  | NM_015948    |
| 200 | AIFM1   | NM_145813    | 1464 | FAM173A | NM_023933    | 2727 | MFSD14B | NM_032558    | 3991 | SLC35B4  | NM_032826    |
| 201 | AIFM2   | NM_032797    | 1465 | FAM173B | NM_199133    | 2728 | MFSD2   | BC011587     | 3992 | SLC35B4  | AK056475     |
| 202 | AIG1    | NM_0016108   | 1466 | FAM174A | NM_198507    | 2729 | MFSD2A  | NM_032793    | 3993 | SLC35C1  | NM_018389    |
| 203 | AKAP1   | NM_003488    | 1467 | FAM174A | NM_198507    | 2730 | MFSD3   | NM_138431    | 3994 | SLC35C2  | NM_015945    |
| 204 | ALCAM   | NM_001627    | 1468 | FAM189B | NM_198264    | 2731 | MFSD3   | NM_138431    | 3995 | SLC35C2  | NM_173073    |
| 205 | ALDH3A2 | NM_001031806 | 1469 | FAM189B | NM_198264    | 2732 | MFSD4A  | NM_181644    | 3996 | SLC35D1  | NM_015139    |
| 206 | ALDH3A2 | NM_000382    | 1470 | FAM189B | NM_006589    | 2733 | MFSD5   | NM_032889    | 3997 | SLC35E1  | NM_024881    |
| 207 | ALDH6A1 | NM_005589    | 1471 | FAM19A1 | NM_213609    | 2734 | MFSD7   | NM_032219    | 3998 | SLC35E3  | NM_018656    |
| 208 | ALG1    | NM_019109    | 1472 | FAM19A4 | NM_182522    | 2735 | MFSD7   | NM_032219    | 3999 | SLC35F2  | NM_017515    |
| 209 | ALG10   | BC070347     | 1473 | FAM209B | NM_001013646 | 2736 | MFSD8   | NM_152778    | 4000 | SLC35F3  | NM_173508    |
| 210 | ALG12   | NM_024105    | 1474 | FAM20A  | NM_017565    | 2737 | MFSD9   | NM_032718    | 4001 | SLC35F4  | NM_001080455 |
| 211 | ALG14   | NM_144988    | 1475 | FAM20B  | NM_014864    | 2738 | MFSD9   | NM_032718    | 4002 | SLC35F5  | NM_025181    |
| 212 | ALG3    | NM_005787    | 1476 | FAM20C  | NM_020223    | 2739 | MGAM    | NM_004668    | 4003 | SLC35F6  | NM_017877    |
| 213 | ALG5    | NM_013338    | 1477 | FAM210A | NM_152352    | 2740 | MGAT1   | NM_002406    | 4004 | SLC35G1  | NM_001134658 |
| 214 | ALG5    | NM_013338    | 1478 | FAM210B | NM_080821    | 2741 | MGAT2   | NM_001015883 | 4005 | SLC35G2  | NM_025246    |
| 215 | ALG6    | NM_013339    | 1479 | FAM213A | NM_032333    | 2742 | MGAT2   | NM_002408    | 4006 | SLC36A1  | NM_078483    |
| 216 | ALG8    | NM_024079    | 1480 | FAM234A | NM_032039    | 2743 | MGAT3   | NM_002409    | 4007 | SLC36A2  | NM_181776    |
| 217 | ALG8    | NM_024079    | 1481 | FAM234A | NM_032039    | 2744 | MGAT4A  | NM_012214    | 4008 | SLC36A3  | NM_181776    |
| 218 | ALG9    | NM_024740    | 1482 | FAM24B  | NM_152644    | 2745 | MGAT4B  | NM_054013    | 4009 | SLC36A4  | XM_058449    |
| 219 | ALG9    | NM_024740    | 1483 | FAM26D  | NM_153036    | 2746 | MGAT4B  | NM_014275    | 4010 | SLC36A4  | NM_152313    |
| 220 | ALOX5AP | NM_001204406 | 1484 | FAM26E  | NM_153711    | 2747 | MGAT4C  | NM_013244    | 4011 | SLC37A2  | NM_198277    |
| 221 | ALOX5AP | NM_001629    | 1485 | FAM26F  | NM_001010919 | 2748 | MGAT5   | NM_002410    | 4012 | SLC37A3  | NM_032295    |
| 222 | AMFR    | NM_001144    | 1486 | FAM3A   | NM_021806    | 2749 | MGC4368 | NM_024510    | 4013 | SLC37A4  | NM_001467    |
| 223 | AMHR2   | NM_020547    | 1487 | FAM3B   | NM_206964    | 2750 | MGST1   | NM_145791    | 4014 | SLC38A1  | NM_001077484 |
| 224 | AMIGO1  | NM_020703    | 1488 | FAM3B   | NM_058186    | 2751 | MGST1   | NM_020300    | 4015 | SLC38A1  | NM_030674    |
| 225 | AMIGO1  | NM_020703    | 1489 | FAM3C   | NM_014888    | 2752 | MGST1   | NM_145764    | 4016 | SLC38A10 | NM_138570    |
| 226 | AMIGO2  | NM_001143668 | 1490 | FAM3D   | NM_138805    | 2753 | MGST2   | NM_002413    | 4017 | SLC38A10 | BC014156     |
| 227 | AMIGO3  | NM_198722    | 1491 | FAM57B  | NM_031478    | 2754 | MGST3   | NM_004528    | 4018 | SLC38A10 | NM_138570    |
| 228 | AMN     | NM_0030943   | 1492 | FAM69A  | NM_001006605 | 2755 | MILR1   | NM_001085423 | 4019 | SLC38A2  | NM_018976    |
| 229 | ANG     | NM_001145    | 1493 | FAM69A  | NM_001006605 | 2756 | MIP     | NM_012064    | 4020 | SLC38A3  | NM_006841    |
| 230 | ANGPTL7 | NM_021146    | 1494 | FAM69B  | NM_152421    | 2757 | MLANA   | NM_005511    | 4021 | SLC38A4  | NM_018018    |
| 231 | ANKH    | NM_054027    | 1495 | FAM8A1  | NM_016255    | 2758 | MLC1    | NM_015166    | 4022 | SLC38A5  | NM_033518    |
| 232 | ANKRD22 | NM_144590    | 1496 | FAM8A1  | NM_016255    | 2759 | MLC1    | NM_139202    | 4023 | SLC38A7  | NM_018231    |
| 233 | ANKRD46 | NM_198401    | 1497 | FAP     | NM_004460    | 2760 | MLEC    | NM_014730    | 4024 | SLC39A1  | NM_014437    |
| 234 | ANO1    | BC033036     | 1498 | FAR1    | NM_032228    | 2761 | MLF2    | NM_005439    | 4025 | SLC39A11 | NM_139177    |
| 235 | ANO1    | NM_018043    | 1499 | FAR1    | AK090880     | 2762 | MLF2    | NM_005439    | 4026 | SLC39A12 | NM_152725    |
| 236 | ANO1    | NM_018043    | 1500 | FAR2    | NM_018099    | 2763 | MLN     | NM_001040109 | 4027 | SLC39A12 | NM_001145195 |
| 237 | ANO10   | NM_018075    | 1501 | FASLG   | NM_000639    | 2764 | MLNR    | NM_001507    | 4028 | SLC39A13 | NM_152264    |
| 238 | ANO2    | NM_020373    | 1502 | FASLG   | NM_000639    | 2765 | MMD     | NM_012329    | 4029 | SLC39A13 | NM_152264    |
| 239 | ANO3    | NM_031418    | 1503 | FATE1   | NM_033085    | 2766 | MME     | NM_007287    | 4030 | SLC39A14 | NM_001128431 |
| 240 | ANO6    | NM_001025356 | 1504 | FBXW7   | NM_033632    | 2767 | MME     | NM_007288    | 4031 | SLC39A2  | NM_014579    |
| 241 | ANO6    | NM_001142678 | 1505 | FBXW7   | NM_018315    | 2768 | MME     | NM_000902    | 4032 | SLC39A3  | NM_144564    |
| 242 | ANO7    | NM_001001891 | 1506 | FCAMR   | NM_001170631 | 2769 | MME     | NM_007289    | 4033 | SLC39A3  | NM_144564    |
| 243 | ANO9    | AK026923     | 1507 | FCAR    | NM_002000    | 2770 | MMGT1   | NM_173470    | 4034 | SLC39A4  | NM_130849    |
| 244 | ANO9    | NM_001012302 | 1508 | FCAR    | NM_133277    | 2771 | MMP14   | NM_004995    | 4035 | SLC39A4  | AK056900     |
| 245 | ANPEP   | NM_001150    | 1509 | FCAR    | NM_133269    | 2772 | MMP15   | NM_002428    | 4036 | SLC39A5  | NM_173596    |
| 246 | ANTXR1  | NM_018153    | 1510 | FCER1A  | NM_002001    | 2773 | MMP16   | NM_005941    | 4037 | SLC39A6  | NM_012319    |
| 247 | ANTXR1  | NM_032208    | 1511 | FCER1G  | BC020763     | 2774 | MMP20   | NM_004771    | 4038 | SLC39A7  | NM_006979    |
| 248 | ANTXR2  | NM_058172    | 1512 | FCER1G  | NM_004106    | 2775 | MMP23B  | NM_006983    | 4039 | SLC39A7  | NM_006979    |
| 249 | ANTXR2  | NM_001145794 | 1513 | FCER2   | NM_002002    | 2776 | MMP24   | NM_006690    | 4040 | SLC39A8  | NM_022154    |
| 250 | ANTXR2  | AY040326     | 1514 | FCGR1A  | NM_000566    | 2777 | MOG     | NM_206809    | 4041 | SLC39A8  | NM_022154    |
| 251 | AOC2    | NM_009590    | 1515 | FCGR1B  | NM_001017986 | 2778 | MOG     | NM_002433    | 4042 | SLC39A9  | NM_018375    |
| 252 | AOC2    | NM_001158    | 1516 | FCGR1B  | NM_001004340 | 2779 | MOGAT1  | NM_058165    | 4043 | SLC39A9  | NM_018375    |
| 253 | AOC3    | NM_003734    | 1517 | FCGR2A  | NM_001136219 | 2780 | MOGAT2  | NM_025098    | 4044 | SLC3A2   | NM_002394    |
| 254 | APCDD1  | NM_153000    | 1518 | FCGR2A  | NM_021642    | 2781 | MOGAT3  | NM_178176    | 4045 | SLC3A2   | NM_001012622 |
| 255 | APH1A   | NM_016022    | 1519 | FCGR2B  | NM_001002275 | 2782 | MOGS    | NM_006302    | 4046 | SLC40A1  | NM_014585    |
| 256 | APH1A   | NM_001077628 | 1520 | FCGR2B  | NM_004001    | 2783 | MOSPD1  | NM_019556    | 4047 | SLC41A1  | XM_170932    |
| 257 | APH1A   | NM_016022    | 1521 | FCGR2B  | NM_001002273 | 2784 | MOSPD1  | NM_019556    | 4048 | SLC41A2  | NM_032148    |
| 258 | APH1B   | NM_031301    | 1522 | FCGR2C  | NM_201563    | 2785 | MOSPD2  | NM_152581    | 4049 | SLC41A3  | NM_001008485 |
| 259 | APLNR   | NM_005161    | 1523 | FCGR3A  | NM_000569    | 2786 | MOSPD3  | NM_001040097 | 4050 | SLC43A1  | NM_003627    |
| 260 | APLP1   | NM_005166    | 1524 | FCGR3A  | NM_001127596 | 2787 | MOSPD3  | NM_023948    | 4051 | SLC43A2  | NM_152346    |
| 261 | APLP2   | BC004371     | 1525 | FCGR3A  | NM_001127592 | 2788 | MPDU1   | NM_004870    | 4052 | SLC43A2  | NM_152346    |
| 262 | APLP2   | NM_001642    | 1526 | FCGR3A  | NM_001127595 | 2789 | MPEG1   | NM_001039396 | 4053 | SLC43A3  | NM_014096    |
| 263 | APOL1   | NM_003861    | 1527 | FCGR3A  | NM_001127593 | 2790 | MPG     | NM_001015054 | 4054 | SLC43A3  | NM_017611    |
| 264 | APOL1   | NM_145344    | 1528 | FCGR3B  | NM_000570    | 2791 | MPG     | NM_002434    | 4055 | SLC44A1  | NM_080546    |
| 265 | APOL2   | NM_0030882   | 1529 | FCGR3B  | NM_001244753 | 2792 | MPL     | NM_005373    | 4056 | SLC44A2  | AF070636     |
| 266 | APOL2   | NM_145637    | 1530 | FCGRT   | NM_001136019 | 2793 | MPPE1   | NM_023075    | 4057 | SLC44A2  | NM_020428    |
| 267 | APOL4   | NM_145660    | 1531 | FCGRT   | NM_004107    | 2794 | MPV17   | NM_002437    | 4058 | SLC44A4  | NM_025257    |
| 268 | APOO    | NM_024122    | 1532 | FCMR    | NM_005449    | 2795 | MPZ     | NM_000530    | 4059 | SLC44A5  | NM_152697    |
| 269 | APP     | NM_201414    | 1533 | FCRL1   | NM_052938    | 2796 | MPZL1   | NM_024569    | 4060 | SLC45A2  | BC003597     |
| 270 | APP     | NM_201413    | 1534 | FCRL2   | NM_030764    | 2797 | MPZL2   | NM_005797    | 4061 | SLC45A2  | NM_001012509 |
| 271 | APP     | NM_000484    | 1535 | FCRL3   | BC028933     | 2798 | MPZL2   | NM_144765    | 4062 | SLC45A2  | NM_016180    |
| 272 | APP     | NM_001136129 | 1536 | FCRL4   | NM_031282    | 2799 | MPZL2   | NM_005797    | 4063 | SLC45A3  | NM_033102    |
| 273 | AQP1    | NM_198098    | 1537 | FCRL5   | NM_031281    | 2800 | MR1     | NM_001531    | 4064 | SLC45A4  | BC033223     |
| 274 | AQP10   | NM_080429    | 1538 | FCRLA   | NM_032738    | 2801 | MRAP    | NM_206898    | 4065 | SLC46A2  | NM_033051    |
| 275 | AQP11   | NM_173039    | 1539 | FDCSP   | NM_152997    | 2802 | MRAP    | NM_178817    | 4066 | SLC46A3  | NM_181785    |
| 276 | AQP2    | NM_000486    | 1540 | FFAR1   | NM_005303    | 2803 | MRAP2   | NM_138409    | 4067 | SLC47A2  | NM_152908    |
| 277 | AQP3    | NM_004925    | 1541 | FFAR1   | NM_005303    | 2804 | MRC1    | NM_002438    | 4068 | SLC48A1  | NM_017842    |
| 278 | AQP3    | NM_004925    | 1542 | FFAR2   | NM_005306    | 2805 | MRGPRD  | NM_198923    | 4069 | SLC48A1  | NM_017842    |

|     |          |              |      |          |              |      |          |              |      |         |              |
|-----|----------|--------------|------|----------|--------------|------|----------|--------------|------|---------|--------------|
| 279 | AQP4     | NM_004028    | 1543 | FFAR3    | NM_005304    | 2806 | MRGPRE   | NM_001039165 | 4070 | SLC48A1 | BC019703     |
| 280 | AQP4     | NM_001650    | 1544 | FFAR4    | NM_181745    | 2807 | MRGPRX1  | NM_147199    | 4071 | SLC4A1  | NM_000342    |
| 281 | AQP5     | NM_001651    | 1545 | FGF10    | NM_004465    | 2808 | MRGPRX2  | NM_054030    | 4072 | SLC4A2  | BC009386     |
| 282 | AQP6     | NM_001652    | 1546 | FGF19    | NM_005117    | 2809 | MRGPRX3  | NM_054031    | 4073 | SLC4A3  | NM_1521574   |
| 283 | AQP7     | NM_001170    | 1547 | FGF4     | NM_002007    | 2810 | MRGPRX4  | NM_054032    | 4074 | SLC4A5  | NM_021196    |
| 284 | AQP8     | NM_001169    | 1548 | FGF6     | NM_020996    | 2811 | MRRF     | NM_138777    | 4075 | SLC50A1 | NM_018845    |
| 285 | AQP9     | NM_020980    | 1549 | FGFR1    | NM_023105    | 2812 | MRRF     | NM_199177    | 4076 | SLC51A  | NM_152672    |
| 286 | AREG     | NM_001657    | 1550 | FGFR1    | NM_023105    | 2813 | MRV1     | NM_130385    | 4077 | SLC51B  | NM_178859    |
| 287 | ARHGAP36 | NM_144967    | 1551 | FGFR1    | NM_023106    | 2814 | MS4A1    | NM_152866    | 4078 | SLC52A1 | NM_017986    |
| 288 | ARL10    | NM_173664    | 1552 | FGFR1    | NM_015850    | 2815 | MS4A1    | NM_021950    | 4079 | SLC52A2 | NM_024531    |
| 289 | ARL6IP1  | NM_015161    | 1553 | FGFR1    | NM_023110    | 2816 | MS4A10   | NM_206893    | 4080 | SLC52A3 | NM_033409    |
| 290 | ARL6IP5  | NM_006407    | 1554 | FGFR1    | NM_001174064 | 2817 | MS4A12   | NM_017716    | 4081 | SLC5A1  | NM_000343    |
| 291 | ARL6IP6  | NM_152522    | 1555 | FGFR1    | NM_023106    | 2818 | MS4A15   | NM_152717    | 4082 | SLC5A10 | NM_152351    |
| 292 | ARMC10   | NM_031905    | 1556 | FGFR1    | NM_015850    | 2819 | MS4A2    | NM_000139    | 4083 | SLC5A10 | NM_001042450 |
| 293 | ARMCX1   | NM_016608    | 1557 | FGFR2    | NM_022970    | 2820 | MS4A3    | NM_001031666 | 4084 | SLC5A2  | NM_003041    |
| 294 | ARMCX2   | NM_177949    | 1558 | FGFR2    | BC039243     | 2821 | MS4A3    | NM_006138    | 4085 | SLC5A5  | NM_000453    |
| 295 | ARMCX2   | NM_014782    | 1559 | FGFR2    | NM_000141    | 2822 | MS4A4A   | NM_148975    | 4086 | SLC5A6  | NM_021095    |
| 296 | ARMCX3   | NM_177948    | 1560 | FGFR2    | BC039243     | 2823 | MS4A4A   | NM_148975    | 4087 | SLC5A7  | NM_021815    |
| 297 | ARMCX3   | NM_016607    | 1561 | FGFR2    | NM_000141    | 2824 | MS4A4A   | NM_024021    | 4088 | SLC5A8  | NM_145913    |
| 298 | ARMCX3   | NM_177948    | 1562 | FGFR3    | NM_001163213 | 2825 | MS4A5    | NM_023945    | 4089 | SLC5A9  | NM_001135181 |
| 299 | ARMCX6   | NM_001009584 | 1563 | FGFR3    | NM_000142    | 2826 | MS4A6A   | NM_152852    | 4090 | SLC5A9  | NM_001011547 |
| 300 | ARSD     | NM_001669    | 1564 | FGFRL1   | NM_021923    | 2827 | MS4A6A   | NM_152851    | 4091 | SLC6A1  | NM_003042    |
| 301 | ARSD     | NM_001669    | 1565 | FGG      | NM_000509    | 2828 | MS4A7    | NM_021201    | 4092 | SLC6A11 | NM_014229    |
| 302 | ARSF     | NM_004042    | 1566 | FGG      | NM_000509    | 2829 | MS4A7    | NM_021201    | 4093 | SLC6A12 | NM_003044    |
| 303 | ARSF     | NM_004042    | 1567 | FGG      | NM_021870    | 2830 | MS4A8    | NM_031457    | 4094 | SLC6A12 | NM_001122847 |
| 304 | ART3     | NM_001179    | 1568 | FICD     | NM_007076    | 2831 | MSLN     | NM_005823    | 4095 | SLC6A13 | NM_016615    |
| 305 | ARV1     | NM_022786    | 1569 | FIS1     | NM_016068    | 2832 | MSLN     | NM_013404    | 4096 | SLC6A14 | NM_007231    |
| 306 | ASB11    | NM_080873    | 1570 | FITM1    | NM_203402    | 2833 | MSMB     | NM_002443    | 4097 | SLC6A15 | NM_182767    |
| 307 | ASB5     | NM_080874    | 1571 | FKBP11   | NM_016594    | 2834 | MSMB     | NM_138634    | 4098 | SLC6A15 | NM_018057    |
| 308 | ASB5     | NM_080874    | 1572 | FKBP7    | NM_181342    | 2835 | MSMO1    | NM_006745    | 4099 | SLC6A17 | NM_001010898 |
| 309 | ASGR1    | NM_001671    | 1573 | FKBP7    | NM_016105    | 2836 | MSMO1    | NM_001017369 | 4100 | SLC6A19 | NM_001003841 |
| 310 | ASGR2    | NM_080913    | 1574 | FKBP8    | NM_012181    | 2837 | MSR1     | NM_138715    | 4101 | SLC6A2  | NM_001043    |
| 311 | ASGR2    | NM_080912    | 1575 | FKRP     | NM_024301    | 2838 | MSR1     | NM_138716    | 4102 | SLC6A2  | NM_001172504 |
| 312 | ASGR2    | NM_001201352 | 1576 | FKTN     | NM_001079802 | 2839 | MSR1     | NM_138715    | 4103 | SLC6A20 | NM_020208    |
| 313 | ASGR2    | NM_001181    | 1577 | FKTN     | NM_006731    | 2840 | MSR1     | NM_138716    | 4104 | SLC6A20 | NM_022405    |
| 314 | ASGR2    | NM_080914    | 1578 | FLJ38482 | NM_152681    | 2841 | MSR1     | NM_002445    | 4105 | SLC6A3  | NM_001044    |
| 315 | ASIC5    | NM_017419    | 1579 | FLRT1    | NM_013280    | 2842 | MST1R    | NM_002447    | 4106 | SLC6A4  | NM_001045    |
| 316 | ASPH     | NM_032466    | 1580 | FLRT2    | NM_013231    | 2843 | MST1R    | NM_002447    | 4107 | SLC6A5  | NM_004211    |
| 317 | ASPH     | NM_004318    | 1581 | FLRT3    | NM_198391    | 2844 | MTARC1   | NM_022746    | 4108 | SLC6A7  | NM_014228    |
| 318 | ASPH     | NM_032468    | 1582 | FLRT3    | NM_013281    | 2845 | MTARC1   | NM_022746    | 4109 | SLC6A8  | NM_005629    |
| 319 | ATCAY    | NM_033064    | 1583 | FLT3     | NM_004119    | 2846 | MTARC2   | NM_017898    | 4110 | SLC6A9  | NM_201649    |
| 320 | ATG9A    | NM_024085    | 1584 | FLT3     | NM_004119    | 2847 | MTARC2   | AL136931     | 4111 | SLC6A9  | NM_001024845 |
| 321 | ATL1     | NM_015915    | 1585 | FLT3LG   | NM_001459    | 2848 | MTATP6   | NM_173702    | 4112 | SLC6A9  | NM_006934    |
| 322 | ATL3     | NM_015459    | 1586 | FLT3LG   | NM_001204502 | 2849 | MTCH1    | NM_014341    | 4113 | SLC7A1  | NM_001048164 |
| 323 | ATL3     | AK090822     | 1587 | FLT4     | NM_002020    | 2850 | MTCH1    | NM_014341    | 4114 | SLC7A1  | NM_003045    |
| 324 | ATL3     | NM_015459    | 1588 | FLT4     | NM_182925    | 2851 | MTCO2    | NM_173705    | 4115 | SLC7A10 | NM_019849    |
| 325 | ATL3     | XM_043151    | 1589 | FLT4     | NM_002020    | 2852 | MTDH     | NM_178812    | 4116 | SLC7A11 | NM_014331    |
| 326 | ATP10A   | NM_024490    | 1590 | FLT4     | NM_002020    | 2853 | MTND1    | NM_173708    | 4117 | SLC7A13 | NM_138817    |
| 327 | ATP10D   | NM_020453    | 1591 | FLVCR1   | NM_014053    | 2854 | MTND3    | NM_173710    | 4118 | SLC7A2  | NM_001008539 |
| 328 | ATP11C   | AK091552     | 1592 | FLVCR1   | NM_014053    | 2855 | MTND4    | NM_173711    | 4119 | SLC7A3  | NM_001048164 |
| 329 | ATP12A   | NM_001676    | 1593 | FLVCR2   | NM_017791    | 2856 | MTND4L   | NM_173712    | 4120 | SLC7A3  | NM_032803    |
| 330 | ATP13A2  | BC030267     | 1594 | FMO3     | NM_006894    | 2857 | MTNR1A   | NM_005958    | 4121 | SLC7A4  | NM_004173    |
| 331 | ATP1A1   | NM_000701    | 1595 | FMO4     | NM_002022    | 2858 | MTNR1B   | NM_005959    | 4122 | SLC7A5  | NM_003486    |
| 332 | ATP1A2   | NM_000702    | 1596 | FMO5     | NM_001461    | 2859 | MTUS1    | NM_001001924 | 4123 | SLC7A5  | NM_003486    |
| 333 | ATP1A3   | NM_152296    | 1597 | FMR1NB   | NM_152578    | 2860 | MTX1     | NM_198883    | 4124 | SLC7A6  | NM_001076785 |
| 334 | ATP1A3   | NM_000703    | 1598 | FNDC3B   | NM_022763    | 2861 | MTX1     | NM_002455    | 4125 | SLC7A6  | NM_003983    |
| 335 | ATP1A4   | NM_001001734 | 1599 | FNDC4    | NM_022823    | 2862 | MUC1     | NM_002456    | 4126 | SLC7A7  | NM_003982    |
| 336 | ATP1A4   | BC028297     | 1600 | FNDC5    | NM_001171941 | 2863 | MUC1     | NM_001044392 | 4127 | SLC7A8  | NM_012244    |
| 337 | ATP1B1   | NM_001677    | 1601 | FNDC5    | NM_153756    | 2864 | MUC1     | NM_001018016 | 4128 | SLC7A8  | NM_182728    |
| 338 | ATP1B1   | NM_001001787 | 1602 | FOLH1    | NM_001014986 | 2865 | MUC13    | NM_033049    | 4129 | SLC7A8  | NM_012244    |
| 339 | ATP1B2   | NM_001303263 | 1603 | FOLH1    | NM_004476    | 2866 | MUC15    | NM_145650    | 4130 | SLC7A9  | NM_014270    |
| 340 | ATP1B3   | NM_001679    | 1604 | FOLR1    | NM_016725    | 2867 | MUL1     | NM_024544    | 4131 | SLC8A1  | NM_021097    |
| 341 | ATP2A1   | NM_173201    | 1605 | FOLR1    | NM_000802    | 2868 | MUL1     | NM_024544    | 4132 | SLC8A3  | NM_183002    |
| 342 | ATP2A2   | NM_170665    | 1606 | FPR1     | NM_002029    | 2869 | MUSK     | NM_005592    | 4133 | SLC8A3  | NM_058240    |
| 343 | ATP2A3   | NM_005173    | 1607 | FPR1     | NM_002029    | 2870 | MXRA8    | NM_032348    | 4134 | SLC9A1  | NM_003047    |
| 344 | ATP2B2   | NM_001683    | 1608 | FPR1     | NM_001193306 | 2871 | MYADM    | NM_001020818 | 4135 | SLC9A2  | NM_003048    |
| 345 | ATP2C1   | NM_014382    | 1609 | FPR2     | NM_001005738 | 2872 | MYADM    | NM_138373    | 4136 | SLC9A3  | NM_004174    |
| 346 | ATP2C2   | NM_014861    | 1610 | FPR2     | NM_001462    | 2873 | NAAA     | NM_014435    | 4137 | SLC9A6  | NM_006359    |
| 347 | ATP4B    | NM_000705    | 1611 | FPR2     | NM_001462    | 2874 | NAALAD2  | NM_005467    | 4138 | SLC9A8  | NM_015266    |
| 348 | ATP5G1   | NM_005175    | 1612 | FPR3     | NM_002030    | 2875 | NAALADL2 | NM_207015    | 4139 | SLC9A9  | AL832304     |
| 349 | ATP5G2   | NM_005176    | 1613 | FREM2    | NM_207361    | 2876 | NAGPA    | NM_016256    | 4140 | SLC9A9  | NM_173653    |
| 350 | ATP5G3   | NM_001689    | 1614 | FRMD5    | NM_001286491 | 2877 | NAT8     | NM_003960    | 4141 | SLC9A9  | NM_173653    |
| 351 | ATP5J2   | NM_004889    | 1615 | FSHR     | NM_000145    | 2878 | NAXD     | NM_018210    | 4142 | SLC9B1  | BC022079     |
| 352 | ATP6AP1  | NM_001183    | 1616 | FSHR     | NM_000145    | 2879 | NCAM1    | NM_001242607 | 4143 | SLC9B2  | NM_178833    |
| 353 | ATP6AP2  | NM_005765    | 1617 | FURIN    | NM_002569    | 2880 | NCAM2    | NM_004540    | 4144 | SLCO1A2 | NM_134431    |
| 354 | ATP6V0A1 | NM_005177    | 1618 | FUT1     | NM_000148    | 2881 | NCEH1    | NM_020792    | 4145 | SLCO1A2 | NM_021094    |
| 355 | ATP6V0A1 | NM_001130021 | 1619 | FUT10    | NM_032664    | 2882 | NCLN     | NM_020170    | 4146 | SLCO1B1 | NM_006446    |
| 356 | ATP6V0A2 | AK056800     | 1620 | FUT2     | NM_000511    | 2883 | NCLN     | NM_004829    | 4147 | SLCO1C1 | NM_017435    |
| 357 | ATP6V0A2 | NM_012463    | 1621 | FUT4     | NM_002033    | 2884 | NCR2     | NM_004828    | 4148 | SLCO2A1 | NM_005630    |
| 358 | ATP6V0B  | NM_001039457 | 1622 | FUT7     | NM_004479    | 2885 | NCSTN    | NM_015331    | 4149 | SLCO2B1 | NM_007256    |
| 359 | ATP6V0B  | XM_001463    | 1623 | FUT8     | NM_004480    | 2886 | ND1      | NM_018087    | 4150 | SLCO3A1 | NM_013272    |
| 360 | ATP6V0B  | NM_004047    | 1624 | FUT9     | NM_006581    | 2887 | NDFIP1   | NM_030571    | 4151 | SLCO3A1 | BC000585     |
| 361 | ATP6V0C  | NM_001694    | 1625 | FXYD1    | NM_021902    | 2888 | NDST3    | NM_004784    | 4152 | SLCO4A1 | NM_016354    |
| 362 | ATP6V0E1 | NM_003945    | 1626 | FXYD2    | NM_021603    | 2889 | NDST3    | NM_004784    | 4153 | SLCO4C1 | NM_180991    |
| 363 | ATP7A    | NM_000052    | 1627 | FXYD2    | NM_001680    | 2890 | NDUFA1   | NM_004541    | 4154 | SLCO5A1 | NM_030958    |
| 364 | ATP7B    | NM_000053    | 1628 | FXYD3    | NM_005971    | 2891 | NDUFA11  | NM_175614    | 4155 | SLITRK1 | NM_025910    |
| 365 | ATP8A1   | NM_006095    | 1629 | FXYD4    | NM_173160    | 2892 | NDUFA13  | NM_015965    | 4156 | SLITRK2 | NM_032539    |
| 366 | ATP8A2   | NM_016529    | 1630 | FXYD4    | NM_173160    | 2893 | NDUFA3   | NM_004542    | 4157 | SLITRK3 | NM_014926    |
| 367 | ATP8B3   | BC033179     | 1631 | FXYD5    | NM_014164    | 2894 | NDUFA4   | NM_002489    | 4158 | SLITRK4 | NM_173078    |
| 368 | ATRAID   | NM_016085    | 1632 | FXYD6    | NM_022003    | 2895 | NDUFA4L2 | NM_020142    | 4159 | SLITRK5 | NM_015567    |
| 369 | ATRAID   | NM_016085    | 1633 | FXYD6    | NM_022003    | 2896 | NDUFB1   | NM_004545    | 4160 | SLN     | NM_003063    |
| 370 | ATRAID   | NM_080592    | 1634 | FXYD6    | NM_022003    | 2897 | NDUFB11  | NM_019056    | 4161 | SMAGP   | NM_001033873 |
| 371 | ATRN     | NM_139322    | 1635 | FXYD7    | NM_022006    | 2898 | NDUFB3   | NM_002491    | 4162 | SMCO4   | NM_020179    |

|     |          |              |      |         |              |      |         |              |      |           |              |
|-----|----------|--------------|------|---------|--------------|------|---------|--------------|------|-----------|--------------|
| 372 | AVPR1A   | NM_000706    | 1636 | FZD1    | NM_003505    | 2899 | NDUFB4  | NM_004547    | 4163 | SMDT1     | NM_033318    |
| 373 | AVPR2    | NM_000054    | 1637 | FZD10   | NM_007197    | 2900 | NDUFB5  | NM_002492    | 4164 | SMIM11    | NM_058182    |
| 374 | AWAT1    | NM_001013579 | 1638 | FZD2    | NM_001466    | 2901 | NDUFB6  | NM_002493    | 4165 | SMIM19    | NM_138436    |
| 375 | AWAT2    | NM_001002254 | 1639 | FZD3    | NM_017412    | 2902 | NDUFB8  | NM_005004    | 4166 | SMIM7     | NM_024104    |
| 376 | AXL      | NM_021913    | 1640 | FZD4    | NM_012193    | 2903 | NDUFC2  | NM_004549    | 4167 | SMIM8     | NM_001042493 |
| 377 | B3GALNT1 | NM_003781    | 1641 | FZD5    | NM_003468    | 2904 | NECTIN1 | NM_002855    | 4168 | SMIM8     | AF311339     |
| 378 | B3GALNT1 | NM_033167    | 1642 | FZD6    | NM_003506    | 2905 | NECTIN2 | NM_001042724 | 4169 | SMIM8     | NM_020425    |
| 379 | B3GALT2  | NM_003783    | 1643 | FZD7    | BC015915     | 2906 | NECTIN4 | NM_030916    | 4170 | SMO       | NM_005631    |
| 380 | B3GALT4  | NM_003782    | 1644 | FZD7    | NM_003507    | 2907 | NELL2   | NM_006159    | 4171 | SMPD1     | NM_000543    |
| 381 | B3GALT6  | NM_080605    | 1645 | FZD8    | NM_031866    | 2908 | NEO1    | NM_002499    | 4172 | SMPD2     | NM_003080    |
| 382 | B3GAT1   | NM_054025    | 1646 | FZD9    | BC026333     | 2909 | NETO1   | NM_138999    | 4173 | SMPD4     | NM_017951    |
| 383 | B3GAT1   | NM_054025    | 1647 | FZD9    | NM_003508    | 2910 | NETO1   | NM_138966    | 4174 | SMPD4     | NM_017751    |
| 384 | B3GAT1   | NM_018644    | 1648 | G0S2    | NM_015714    | 2911 | NETO2   | NM_018092    | 4175 | SNN       | NM_003498    |
| 385 | B3GAT2   | NM_080742    | 1649 | G6PC    | NM_000151    | 2912 | NEU1    | NM_000434    | 4176 | SNX13     | NM_015132    |
| 386 | B3GAT2   | AK055248     | 1650 | G6PC3   | NM_138387    | 2913 | NEU1    | NM_000434    | 4177 | SNX14     | NM_020468    |
| 387 | B3GAT3   | NM_012200    | 1651 | G6PC3   | NM_138387    | 2914 | NFAM1   | NM_145912    | 4178 | SNX14     | NM_153816    |
| 388 | B3GLCT   | NM_194318    | 1652 | GAA     | NM_001079804 | 2915 | NFE2L3  | NM_004289    | 4179 | SNX14     | AK000362     |
| 389 | B3GNT2   | NM_006577    | 1653 | GAA     | NM_000152    | 2916 | NFE2L3  | NM_004289    | 4180 | SNX14     | NM_153816    |
| 390 | B3GNT2   | NM_006577    | 1654 | GABBR1  | NM_021903    | 2917 | NFXL1   | NM_152995    | 4181 | SNX19     | NM_014758    |
| 391 | B3GNT3   | NM_014256    | 1655 | GABBR1  | NM_021904    | 2918 | NGFR    | NM_002507    | 4182 | SOAT1     | NM_003101    |
| 392 | B3GNT5   | NM_032047    | 1656 | GABBR1  | NM_001470    | 2919 | NINJ1   | NM_004148    | 4183 | SOAT2     | NM_003578    |
| 393 | B3GNT5   | NM_032047    | 1657 | GABBR1  | NM_021903    | 2920 | NINJ2   | BC057766     | 4184 | SOGA3     | NM_001012279 |
| 394 | B3GNT7   | NM_145236    | 1658 | GABBR2  | NM_005458    | 2921 | NIP2A   | NM_001008860 | 4185 | SORCS1    | NM_052918    |
| 395 | B4GALNT1 | NM_001478    | 1659 | GABRA1  | NM_000806    | 2922 | NIP2A   | NM_030922    | 4186 | SORCS2    | NM_020777    |
| 396 | B4GALT1  | NM_001497    | 1660 | GABRA2  | BC022488     | 2923 | NIPAL2  | NM_024759    | 4187 | SORL1     | NM_003105    |
| 397 | B4GALT2  | NM_003780    | 1661 | GABRA2  | NM_000807    | 2924 | NIPAL3  | AK093006     | 4188 | SORT1     | NM_002959    |
| 398 | B4GALT3  | NM_003779    | 1662 | GABRA3  | NM_000808    | 2925 | NIPAL3  | NM_020448    | 4189 | SORT1     | NM_005986    |
| 399 | B4GALT4  | NM_003778    | 1663 | GABRA4  | NM_000809    | 2926 | NIPAL4  | NM_001099287 | 4190 | SPACA1    | BC029488     |
| 400 | B4GALT5  | NM_004776    | 1664 | GABRA5  | NM_000810    | 2927 | NKAIN1  | NM_024522    | 4191 | SPAM1     | NM_153189    |
| 401 | B4GALT7  | NM_007255    | 1665 | GABRA6  | NM_000811    | 2928 | NKAIN2  | NM_001040214 | 4192 | SPAM1     | NM_003117    |
| 402 | B4GAT1   | NM_006876    | 1666 | GABRB1  | NM_000812    | 2929 | NKAIN3  | NM_173688    | 4193 | SPAST     | NM_014946    |
| 403 | B4GAT1   | NM_006876    | 1667 | GABRB2  | NM_021911    | 2930 | NKG7    | NM_005601    | 4194 | SPATA31A7 | NM_015667    |
| 404 | BACE1    | NM_138972    | 1668 | GABRB2  | NM_000813    | 2931 | NLGN1   | NM_014932    | 4195 | SPATA9    | NM_031952    |
| 405 | BACE1    | NM_012104    | 1669 | GABRB3  | NM_000814    | 2932 | NLGN1   | NM_014932    | 4196 | SPCS1     | NM_014041    |
| 406 | BACE2    | NM_012105    | 1670 | GABRB3  | NM_000814    | 2933 | NLGN2   | NM_020795    | 4197 | SPCS1     | NM_014041    |
| 407 | BACE2    | NM_138992    | 1671 | GABRB3  | NM_021912    | 2934 | NLGN3   | NM_018977    | 4198 | SPCS1     | NM_014041    |
| 408 | BACE2    | NM_012105    | 1672 | GABRD   | NM_000815    | 2935 | NLGN4X  | NM_181332    | 4199 | SPCS2     | NM_014752    |
| 409 | BACE2    | NM_138991    | 1673 | GABRE   | NM_004961    | 2936 | NLGN4X  | NM_020742    | 4200 | SPCS3     | NM_021928    |
| 410 | BAI2     | NM_001703    | 1674 | GABRG1  | NM_173536    | 2937 | NLGN4X  | NM_181332    | 4201 | SPG7      | NM_003119    |
| 411 | BAK1     | NM_001188    | 1675 | GABRG2  | NM_198904    | 2938 | NLGN4Y  | NM_014893    | 4202 | SPINK2    | NM_021114    |
| 412 | BAMBI    | NM_012342    | 1676 | GABRG2  | NM_198903    | 2939 | NLGN4Y  | XM_372286    | 4203 | SPINK6    | NM_205841    |
| 413 | BAMBI    | NM_012342    | 1677 | GABRG2  | NM_198903    | 2940 | NLGN4Y  | NM_014893    | 4204 | SPINK9    | NM_001040433 |
| 414 | BAX      | NM_004324    | 1678 | GABRG2  | NM_000816    | 2941 | NLGN4Y  | NM_001164238 | 4205 | SPINT1    | NM_003710    |
| 415 | BAX      | NM_138761    | 1679 | GABRG3  | XM_171734    | 2942 | NMB     | NM_021077    | 4206 | SPINT1    | NM_181642    |
| 416 | BAX      | NM_138763    | 1680 | GABRP   | NM_014211    | 2943 | NMBR    | NM_002511    | 4207 | SPINT2    | NM_021102    |
| 417 | BCAM     | NM_005581    | 1681 | GABRR1  | NM_002042    | 2944 | NMU     | NM_006681    | 4208 | SPINT2    | NM_021102    |
| 418 | BCAP29   | NM_018844    | 1682 | GABRR2  | NM_002043    | 2945 | NMUR1   | NM_006056    | 4209 | SPN       | NM_003123    |
| 419 | BCAP31   | NM_005745    | 1683 | GAL     | NM_015973    | 2946 | NMUR2   | NM_020167    | 4210 | SPN       | NM_003123    |
| 420 | BCAP31   | NM_001139441 | 1684 | GAL3ST1 | NM_004861    | 2947 | NMUR2   | BC016938     | 4211 | SPNS1     | NM_032038    |
| 421 | BCHE     | NM_000055    | 1685 | GAL3ST4 | NM_024637    | 2948 | NNAT    | NM_005386    | 4212 | SPNS3     | NM_182538    |
| 422 | BCL2     | BC027258     | 1686 | GALNT1  | NM_020474    | 2949 | NNAT    | NM_181689    | 4213 | SPPL2A    | NM_032802    |
| 423 | BCL2     | NM_000657    | 1687 | GALNT10 | NM_198321    | 2950 | NNT     | NM_012343    | 4214 | SPPL2B    | NM_152988    |
| 424 | BCL2     | NM_000633    | 1688 | GALNT11 | NM_022087    | 2951 | NNT     | NM_182977    | 4215 | SPPL2B    | NM_001077238 |
| 425 | BCL2L1   | NM_138578    | 1689 | GALNT12 | NM_024642    | 2952 | NOTCH2  | NM_024408    | 4216 | SPPL2B    | AL365405     |
| 426 | BCL2L1   | NM_001191    | 1690 | GALNT12 | NM_024642    | 2953 | NOX1    | NM_007052    | 4217 | SPPL2B    | NM_020172    |
| 427 | BCL2L10  | NM_020396    | 1691 | GALNT13 | NM_052917    | 2954 | NOX1    | NM_013955    | 4218 | SPPL2C    | NM_175882    |
| 428 | BCL2L13  | NM_015367    | 1692 | GALNT14 | NM_024572    | 2955 | NOX3    | NM_015718    | 4219 | SPPL3     | NM_139015    |
| 429 | BCL2L13  | NM_015367    | 1693 | GALNT14 | BC010659     | 2956 | NOX4    | NM_016931    | 4220 | SPPL3     | NM_139015    |
| 430 | BCL2L13  | AF246665     | 1694 | GALNT15 | NM_054110    | 2957 | NOX4    | NM_016931    | 4221 | SPTLC1    | NM_006415    |
| 431 | BCL2L2   | NM_004050    | 1695 | GALNT15 | NM_054110    | 2958 | NOX4    | BC040105     | 4222 | SPTLC1    | BC007085     |
| 432 | BDKRB1   | NM_000710    | 1696 | GALNT2  | NM_004481    | 2959 | NOX4    | NM_016931    | 4223 | SPTSSA    | NM_138288    |
| 433 | BDKRB2   | NM_000623    | 1697 | GALNT3  | NM_004482    | 2960 | NOX5    | NM_024505    | 4224 | SPTSSB    | NM_001040100 |
| 434 | BDNF     | NM_170732    | 1698 | GALNT6  | NM_007210    | 2961 | NOX5    | NM_001184779 | 4225 | SPX       | NM_030572    |
| 435 | BDNF     | NM_170734    | 1699 | GALNT7  | NM_017423    | 2962 | NPAL3   | BC001265     | 4226 | SQLE      | NM_003129    |
| 436 | BDNF     | NM_170731    | 1700 | GALNT8  | NM_017417    | 2963 | NPBWR1  | NM_005285    | 4227 | SQLE      | NM_003129    |
| 437 | BDNF     | NM_001709    | 1701 | GALNT9  | NM_021808    | 2964 | NPBWR2  | NM_005286    | 4228 | SRD5A1    | NM_001047    |
| 438 | BDNF     | NM_170733    | 1702 | GALNT9  | NM_001122636 | 2965 | NPC1    | NM_000271    | 4229 | SRD5A2    | NM_000348    |
| 439 | BDNF     | NM_170735    | 1703 | GALR1   | NM_001480    | 2966 | NPC1L1  | NM_001101648 | 4230 | SRD5A3    | NM_024592    |
| 440 | BDNF     | NM_001143806 | 1704 | GALR2   | NM_003857    | 2967 | NPC1L1  | NM_013389    | 4231 | SRPRB     | NM_021203    |
| 441 | BEST1    | NM_004183    | 1705 | GALR3   | NM_003614    | 2968 | NPDC1   | NM_015392    | 4232 | SSPN      | NM_005086    |
| 442 | BEST1    | NM_001139443 | 1706 | GANAB   | AK026567     | 2969 | NPFFR1  | NM_022146    | 4233 | SSR1      | NM_003144    |
| 443 | BEST2    | NM_017682    | 1707 | GANAB   | NM_198334    | 2970 | NPFFR2  | NM_004885    | 4234 | SSR2      | NM_003145    |
| 444 | BEST3    | NM_152439    | 1708 | GAPT    | NM_152687    | 2971 | NPFFR2  | NM_053036    | 4235 | SSR3      | NM_007107    |
| 445 | BEST4    | NM_153274    | 1709 | GCCR    | NM_000160    | 2972 | NPHS1   | NM_004646    | 4236 | SSTR1     | NM_001049    |
| 446 | BEST4    | NM_153274    | 1710 | GCNT1   | NM_001490    | 2973 | NPHS2   | NM_014625    | 4237 | SSTR1     | BC035618     |
| 447 | BET1     | NM_005868    | 1711 | GCNT2   | NM_001491    | 2974 | NPPA    | NM_006172    | 4238 | SSTR2     | NM_001050    |
| 448 | BET1     | NM_005868    | 1712 | GCNT3   | NM_004751    | 2975 | NPR3    | NM_000908    | 4239 | SSTR3     | NM_001051    |
| 449 | BET1L    | NM_016526    | 1713 | GDAP1   | NM_018972    | 2976 | NPSR1   | NM_207173    | 4240 | SSTR4     | NM_001052    |
| 450 | BET1L    | AY007148     | 1714 | GDAP1L1 | NM_024034    | 2977 | NFTN    | NM_017455    | 4241 | SSTR5     | NM_001053    |
| 451 | BFAR     | NM_016561    | 1715 | GDAP1L1 | NM_024034    | 2978 | NFTN    | NM_017455    | 4242 | SSTR5     | NM_001172560 |
| 452 | BIK      | NM_001197    | 1716 | GDE1    | NM_016641    | 2979 | NPTXR   | NM_014293    | 4243 | ST14      | NM_021978    |
| 453 | BLCAP    | NM_006698    | 1717 | GDNF    | NM_199234    | 2980 | NPY     | NM_000905    | 4244 | ST14      | XM_050735    |
| 454 | BMP2     | NM_001200    | 1718 | GDNF    | NM_199231    | 2981 | NPY1R   | NM_000909    | 4245 | ST14      | NM_021978    |
| 455 | BMPR1A   | NM_004329    | 1719 | GDNF    | NM_000514    | 2982 | NPY2R   | NM_000910    | 4246 | ST3GAL1   | NM_173344    |
| 456 | BMPR1A   | NM_004329    | 1720 | GDPD1   | BC034432     | 2983 | NPY4R   | NM_001278794 | 4247 | ST3GAL1   | NM_003033    |
| 457 | BMPR1B   | NM_001203    | 1721 | GDPD2   | NM_017711    | 2984 | NPY5R   | NM_006174    | 4248 | ST3GAL1   | NM_173344    |
| 458 | BMPR2    | NM_001204    | 1722 | GDPD3   | BC002714     | 2985 | NRCAM   | NM_001037132 | 4249 | ST3GAL2   | NM_006927    |
| 459 | BNIP1    | NM_001205    | 1723 | GDPD5   | NM_030792    | 2986 | NRCAM   | NM_001037133 | 4250 | ST3GAL3   | NM_006279    |
| 460 | BNIP1    | NM_013978    | 1724 | GFRAL   | NM_207410    | 2987 | NRG1    | NM_013964    | 4251 | ST3GAL3   | NM_174964    |
| 461 | BNIP3    | NM_004052    | 1725 | GGCX    | NM_000821    | 2988 | NRG1    | NM_013959    | 4252 | ST3GAL3   | NM_174963    |
| 462 | BNIP3L   | NM_004331    | 1726 | GGCX    | NM_000821    | 2989 | NRG1    | NM_004495    | 4253 | ST3GAL3   | NM_006279    |
| 463 | BPI      | NM_001725    | 1727 | GGT1    | NM_005265    | 2990 | NRG1    | NM_001159995 | 4254 | ST3GAL5   | NM_003896    |
| 464 | BPIFB2   | NM_025227    | 1728 | GGT1    | NM_005265    | 2991 | NRG1    | NM_013956    | 4255 | ST3GAL6   | NM_006100    |



|     |           |              |      |        |              |      |        |              |      |                     |              |
|-----|-----------|--------------|------|--------|--------------|------|--------|--------------|------|---------------------|--------------|
| 465 | BRI3      | NM_015379    | 1729 | GGT1   | NM_013421    | 2992 | NRG2   | NM_004883    | 4256 | ST3GAL6             | NM_006100    |
| 466 | BRICD5    | NM_182563    | 1730 | GGT1   | NM_013430    | 2993 | NRG2   | NM_013983    | 4257 | ST6GALNAC1          | NM_018414    |
| 467 | BRINP2    | NM_021165    | 1731 | GGT5   | NM_004121    | 2994 | NRG2   | NM_013981    | 4258 | ST6GALNAC2          | NM_006456    |
| 468 | BRS3      | NM_001727    | 1732 | GHITM  | NM_014394    | 2995 | NRG3   | NM_001010848 | 4259 | ST6GALNAC3          | NM_152996    |
| 469 | BSCL2     | NM_032667    | 1733 | GHR    | NM_000163    | 2996 | NRG4   | NM_138573    | 4260 | ST6GALNAC3 AK091215 |              |
| 470 | BSG       | NM_198591    | 1734 | GHRL   | NM_016362    | 2997 | NRM    | NM_007243    | 4261 | ST6GALNAC5          | NM_030965    |
| 471 | BSG       | NM_198589    | 1735 | GHRL   | BC025791     | 2998 | NRP1   | NM_001024628 | 4262 | ST7                 | NM_018412    |
| 472 | BSG       | NM_198590    | 1736 | GHSR   | NM_004122    | 2999 | NRP1   | NM_001024629 | 4263 | ST8IA2              | NM_006011    |
| 473 | BSG       | NM_001728    | 1737 | GIMAP2 | NM_015660    | 3000 | NRP1   | BC007533     | 4264 | STAB1               | NM_015136    |
| 474 | BSG       | NM_001728.4  | 1738 | GIMAP5 | NM_018384    | 3001 | NRP2   | NM_003872    | 4265 | STARD3              | NM_006804    |
| 475 | BSND      | NM_057176    | 1739 | GIMAP5 | AL080068     | 3002 | NRP2   | BC009222     | 4266 | STARD3NL            | NM_032016    |
| 476 | BST1      | NM_004334    | 1740 | GIMAP5 | BC011732     | 3003 | NRSN1  | NM_080723    | 4267 | STARD3NL            | NM_032016    |
| 477 | BST1      | NM_004334    | 1741 | GINM1  | NM_138785    | 3004 | NRSN2  | NM_024958    | 4268 | STBD1               | NM_003943    |
| 478 | BST2      | NM_004335    | 1742 | GIPR   | NM_000164    | 3005 | NRXN1  | NM_004801    | 4269 | STBD1               | NM_003943    |
| 479 | BTC       | NM_001729    | 1743 | GJA1   | NM_000165    | 3006 | NRXN1  | NM_001135659 | 4270 | STEAP1              | NM_012449    |
| 480 | BTLA      | NM_181780    | 1744 | GJA3   | NM_021954    | 3007 | NRXN2  | NM_015080    | 4271 | STEAP1              | NM_012449    |
| 481 | BTN1A1    | NM_001732    | 1745 | GJA4   | NM_002060    | 3008 | NRXN3  | NM_004796    | 4272 | STEAP2              | NM_152999    |
| 482 | BTN2A1    | NM_078476    | 1746 | GJA4   | BC027889     | 3009 | NRXN3  | NM_004796    | 4273 | STEAP3              | NM_018234    |
| 483 | BTN2A1    | NM_078476    | 1747 | GJA5   | NM_005266    | 3010 | NSDHL  | NM_015922    | 4274 | STEAP4              | NM_024636    |
| 484 | BTN2A1    | NM_007049    | 1748 | GJA5   | NM_181703    | 3011 | NSG1   | NM_014392    | 4275 | STIM1               | NM_003156    |
| 485 | BTN2A2    | NM_181531    | 1749 | GJA5   | NM_005266    | 3012 | NT5C3A | NM_016489    | 4276 | STOM                | NM_004099    |
| 486 | BTN2A2    | NM_006995    | 1750 | GJA8   | NM_005267    | 3013 | NT5C3A | NM_001002009 | 4277 | STOML1              | NM_004809    |
| 487 | BTN3A1    | NM_007048    | 1751 | GJB1   | NM_000166    | 3014 | NT5C3A | NM_001002010 | 4278 | STOML3              | NM_145286    |
| 488 | BTN3A2    | NM_007047    | 1752 | GJB2   | NM_004004    | 3015 | NT5E   | NM_002526    | 4279 | STRA6               | NM_022369    |
| 489 | BTN3A3    | NM_006994    | 1753 | GJB3   | NM_001005752 | 3016 | NTM    | NM_016522    | 4280 | STRA6               | NM_022369    |
| 490 | BTN3A3    | NM_197974    | 1754 | GJB3   | NM_024009    | 3017 | NTN1   | NM_004822    | 4281 | STRA6               | NM_001142617 |
| 491 | BTNL8     | NM_001040462 | 1755 | GJB5   | NM_005268    | 3018 | NTN4   | NM_021229    | 4282 | STS                 | NM_000351    |
| 492 | BTNL8     | NM_024850    | 1756 | GJB5   | BC004379     | 3019 | NTRK1  | NM_001012331 | 4283 | STT3A               | NM_152713    |
| 493 | BTNL8     | AL833663     | 1757 | GJB6   | NM_00110219  | 3020 | NTRK1  | NM_001007792 | 4284 | STT3B               | NM_178862    |
| 494 | BTNL9     | NM_152547    | 1758 | GJB6   | NM_006783    | 3021 | NTRK1  | NM_002529    | 4285 | STX10               | NM_003765    |
| 495 | C10orf35  | NM_145306    | 1759 | GJB7   | NM_198568    | 3022 | NTRK2  | NM_001007097 | 4286 | STX12               | NM_177424    |
| 496 | C10orf54  | NM_022153    | 1760 | GJC1   | NM_005497    | 3023 | NTRK2  | NM_006180    | 4287 | STX16               | NM_003763    |
| 497 | C10orf99  | NM_207373    | 1761 | GJC1   | NM_001080383 | 3024 | NTRK3  | NM_001007156 | 4288 | STX17               | NM_017919    |
| 498 | C11orf24  | NM_022338    | 1762 | GJD2   | NM_020660    | 3025 | NTRK3  | NM_001012338 | 4289 | STX17               | NM_017919    |
| 499 | C11orf75  | BC031564     | 1763 | GKN1   | NM_019617    | 3026 | NTRK3  | BC013693     | 4290 | STX18               | NM_016930    |
| 500 | C12orf49  | NM_024738    | 1764 | GLB1L2 | NM_138342    | 3027 | NTRK3  | NM_002530    | 4291 | STX1A               | NM_004603    |
| 501 | C14orf1   | NM_007176    | 1765 | GLB1L2 | NM_138342    | 3028 | NTRK3  | NM_002530    | 4292 | STX1B               | NM_052874    |
| 502 | C14orf180 | NM_001008404 | 1766 | GLCE   | NM_015554    | 3029 | NTRK3  | NM_002530    | 4293 | STX2                | NM_194356    |
| 503 | C14orf2   | NM_004894    | 1767 | GLIPR1 | NM_006851    | 3030 | NTRK3  | NM_002531    | 4294 | STX3                | NM_004177    |
| 504 | C14orf49  | BC061899     | 1768 | GLMP   | NM_144580    | 3031 | NTRK3  | BC022501     | 4295 | STX4                | NM_004604    |
| 505 | C15orf48  | NM_032413    | 1769 | GLP1R  | NM_002062    | 3032 | NTRK2  | NM_012344    | 4296 | STX5                | NM_003164    |
| 506 | C15orf48  | BC021173     | 1770 | GLP1R  | NM_002062    | 3033 | NUCB2  | NM_005013    | 4297 | STX6                | NM_005819    |
| 507 | C16orf54  | NM_175900    | 1771 | GLP2R  | NM_004246    | 3034 | NXPE3  | NM_145037    | 4298 | STX7                | NM_003569    |
| 508 | C16orf58  | NM_022744    | 1772 | GLRA1  | NM_000171    | 3035 | NXPE4  | NM_001077639 | 4299 | STX8                | NM_004853    |
| 509 | C17orf62  | NM_001033046 | 1773 | GLRA1  | NM_000171    | 3036 | OCA2   | NM_000275    | 4300 | STYK1               | NM_018423    |
| 510 | C17orf62  | BC004171     | 1774 | GLRA1  | NM_001146040 | 3037 | OGFOD3 | NM_175902    | 4301 | STYK1               | NM_018423    |
| 511 | C17orf80  | NM_0017941   | 1775 | GLRA2  | NM_002063    | 3038 | OGFOD3 | NM_175902    | 4302 | SUCNR1              | NM_033050    |
| 512 | C19orf18  | NM_152474    | 1776 | GLRA3  | NM_006529    | 3039 | OGFOD3 | NM_024648    | 4303 | SULF2               | NM_018837    |
| 513 | C19orf46  | BC052573     | 1777 | GLRA3  | NM_001042543 | 3040 | OLR1   | NM_002543    | 4304 | SULF2               | NM_198596    |
| 514 | C1GALT1   | NM_020156    | 1778 | GLRA4  | NM_001024452 | 3041 | OLR1   | NM_002543    | 4305 | SULF2               | NM_198596    |
| 515 | C1GALT1C1 | NM_152692    | 1779 | GLRB   | NM_000824    | 3042 | OLR1   | NM_001172632 | 4306 | SUN1                | NM_025154    |
| 516 | C1orf115  | NM_024709    | 1780 | GLRB   | NM_001166060 | 3043 | OMA1   | NM_145243    | 4307 | SUN2                | NM_015374    |
| 517 | C1orf159  | BC008788     | 1781 | GLT8D1 | NM_018446    | 3044 | OMA1   | NM_145243    | 4308 | SURF4               | NM_033161    |
| 518 | C1orf162  | NM_174896    | 1782 | GNPTAB | AK056137     | 3045 | OMG    | NM_002544    | 4309 | SURF4               | NM_033161    |
| 519 | C1orf162  | NM_174896    | 1783 | GNRHR  | NM_000406    | 3046 | OPALIN | NM_033207    | 4310 | SUSD1               | NM_022486    |
| 520 | C1orf186  | BD078463     | 1784 | GNS    | NM_002076    | 3047 | OPCML  | NM_001012393 | 4311 | SUSD2               | NM_019601    |
| 521 | C1orf27   | NM_017847    | 1785 | GNS    | BC017742     | 3048 | OPN1LW | NM_020061    | 4312 | SUSD4               | NM_001037175 |
| 522 | C1orf43   | NM_015449    | 1786 | GOLGA5 | NM_005113    | 3049 | OPN3   | NM_014322    | 4313 | SUSD4               | NM_017982    |
| 523 | C1orf43   | BC008306     | 1787 | GOLGB1 | NM_004487    | 3050 | OPN3   | NM_014322    | 4314 | SUSD4               | BC004888     |
| 524 | C1QTNF1   | NM_198594    | 1788 | GOLIM4 | NM_014498    | 3051 | OPN4   | NM_033282    | 4315 | SUSD5               | NM_171054    |
| 525 | C1QTNF1   | NM_030968    | 1789 | GOLM1  | NM_177937    | 3052 | OPN5   | NM_181744    | 4316 | SUSD6               | NM_014734    |
| 526 | C1QTNF6   | NM_031910    | 1790 | GOLM1  | NM_016548    | 3053 | OPN5   | NM_001030051 | 4317 | SV2A                | NM_014849    |
| 527 | C1QTNF6   | NM_031910    | 1791 | GOLT1A | NM_198447    | 3054 | OPRD1  | NM_000911    | 4318 | SV2B                | NM_014848    |
| 528 | C20orf24  | NM_199484    | 1792 | GOLT1B | NM_016072    | 3055 | OPRK1  | NM_000912    | 4319 | SVOP                | NM_018711    |
| 529 | C20orf24  | NM_018840    | 1793 | GOSR1  | AK000606     | 3056 | OPRL1  | NM_000913    | 4320 | SYNDIG1             | NM_024893    |
| 530 | C2CD2     | NM_199050    | 1794 | GOSR1  | NM_004871    | 3057 | OPRM1  | NM_000914    | 4321 | SYNGR2              | NM_004710    |
| 531 | C2orf40   | NM_032411    | 1795 | GOSR2  | NM_001012511 | 3058 | OPRM1  | NM_001145279 | 4322 | SYNGR3              | NM_004209    |
| 532 | C2orf66   | NM_213608    | 1796 | GOSR2  | BC034762     | 3059 | OR10G4 | NM_001004462 | 4323 | SYNJ2BP             | NM_018373    |
| 533 | C3AR1     | NM_004054    | 1797 | GP1BA  | NM_000173    | 3060 | OR11A1 | NM_032161    | 4324 | SYN                 | NM_003179    |
| 534 | C3orf17   | NM_015412    | 1798 | GP1BB  | NM_000407    | 3061 | OR13H1 | NM_001004486 | 4325 | SYPL1               | NM_182715    |
| 535 | C3orf18   | NM_016210    | 1799 | GP2    | NM_001007242 | 3062 | OR1D4  | NM_003552    | 4326 | SYPL1               | NM_182715    |
| 536 | C3orf52   | NM_024616    | 1800 | GP2    | NM_001007240 | 3063 | OR1J2  | NM_054107    | 4327 | SYS1                | NM_033542    |
| 537 | C4orf3    | BC017399     | 1801 | GP2    | NM_001007241 | 3064 | OR2A4  | NM_030908    | 4328 | SYT1                | NM_005639    |
| 538 | C4orf3    | NM_093970    | 1802 | GP5    | NM_004488    | 3065 | OR2AT4 | NM_001005285 | 4329 | SYT11               | NM_152280    |
| 539 | C4orf32   | NM_152400    | 1803 | GP6    | NM_016363    | 3066 | OR2C1  | NM_012368    | 4330 | SYT13               | NM_020826    |
| 540 | C5AR1     | NM_001736    | 1804 | GP9    | NM_000174    | 3067 | OR2C3  | NM_198074    | 4331 | SYT15               | NM_181519    |
| 541 | C5AR1     | NM_001736    | 1805 | GPA33  | NM_005814    | 3068 | OR2L13 | NM_175911    | 4332 | SYT2                | NM_177402    |
| 542 | C5AR2     | NM_018485    | 1806 | GPA1   | NM_003801    | 3069 | OR2L13 | BC028158     | 4333 | SYT5                | NM_003180    |
| 543 | C5orf15   | NM_020199    | 1807 | GPA1   | BC003171     | 3070 | OR2T4  | NM_001004696 | 4334 | SYT9                | NM_175733    |
| 544 | C5orf28   | NM_022483    | 1808 | GPAT3  | NM_032717    | 3071 | OR4M1  | NM_001005500 | 4335 | SYVN1               | NM_032431    |
| 545 | C5orf46   | BC021680     | 1809 | GPAT4  | NM_178819    | 3072 | OR5E1  | NM_152430    | 4336 | SYVN1               | NM_172230    |
| 546 | C7orf42   | BC012562     | 1810 | GPD2   | NM_000408    | 3073 | OR5E2  | NM_030774    | 4337 | TAAR1               | NM_138327    |
| 547 | C7orf42   | BC010519     | 1811 | GPFR1  | NM_001505    | 3074 | OR5I2  | NM_001005170 | 4338 | TAAR2               | NM_014626    |
| 548 | C7orf45   | BC017587     | 1812 | GPM6A  | NM_201592    | 3075 | OR52N1 | NM_001001913 | 4339 | TAAR2               | NM_001033080 |
| 549 | C8orf55   | BC019104     | 1813 | GPM6A  | NM_201591    | 3076 | OR52N5 | NM_001001922 | 4340 | TAAR5               | NM_003967    |
| 550 | C9orf11   | BC014307     | 1814 | GPM6A  | NM_005277    | 3077 | OR56B1 | NM_001005180 | 4341 | TAAR6               | NM_175067    |
| 551 | C9orf123  | BC009510     | 1815 | GPM6B  | NM_001001996 | 3078 | OR5F1  | NM_003697    | 4342 | TAAR8               | NM_053278    |
| 552 | C9orf91   | NM_153045    | 1816 | GPM6B  | NM_005278    | 3079 | OR5P3  | NM_153445    | 4343 | TACR1               | NM_015727    |
| 553 | CA12      | NM_206925    | 1817 | GPM6B  | NM_066246    | 3080 | OR6M1  | NM_001005325 | 4344 | TACR1               | NM_0085M     |
| 554 | CA12      | NM_001218    | 1818 | GPM6B  | NM_005278    | 3081 | OR7C1  | NM_198944    | 4345 | TACR2               | NM_001057    |
| 555 | CA9       | NM_001216    | 1819 | GPNMB  | BC011595     | 3082 | OR7D4  | NM_001005191 | 4346 | TACSTD2             | NM_002353    |
| 556 | CACFD1    | NM_017586    | 1820 | GPNMB  | NM_001005340 | 3083 | OR8A1  | NM_001005194 | 4347 | TAOK2               | NM_004783    |
| 557 | CACHD1    | NM_020925    | 1821 | GPNMB  | NM_002510    | 3084 | OR8K3  | NM_001005202 | 4348 | TAOK2               | NM_004783    |

|     |          |              |      |         |              |      |         |              |      |         |              |
|-----|----------|--------------|------|---------|--------------|------|---------|--------------|------|---------|--------------|
| 558 | CACNA1A  | NM_001127221 | 1822 | GPR1    | NM_005279    | 3085 | ORA11   | NM_032790    | 4349 | TAP1    | NM_000593    |
| 559 | CACNA1B  | NM_000718    | 1823 | GPR1    | NM_005279    | 3086 | ORA11   | NM_032790    | 4350 | TAPBP   | NM_172209    |
| 560 | CACNA1C  | NM_000719    | 1824 | GPR101  | NM_054021    | 3087 | ORA12   | NM_032831    | 4351 | TAPBP   | NM_003190    |
| 561 | CACNA1C  | NM_199460    | 1825 | GPR107  | NM_020960    | 3088 | ORA13   | NM_152288    | 4352 | TAPBPL  | NM_018009    |
| 562 | CACNA1C  | NM_001129844 | 1826 | GPR107  | NM_001136557 | 3089 | ORA13   | NM_152288    | 4353 | TARP    | NM_001003799 |
| 563 | CACNA1G  | NM_198387    | 1827 | GPR108  | NM_001080452 | 3090 | ORMDL1  | NM_016467    | 4354 | TAS1R1  | NM_177540    |
| 564 | CACNA1G  | NM_018896    | 1828 | GPR108  | XM_209194    | 3091 | ORMDL1  | AF395704     | 4355 | TAS1R1  | NM_138697    |
| 565 | CACNA1H  | NM_021098    | 1829 | GPR119  | NM_178471    | 3092 | ORMDL2  | NM_014182    | 4356 | TAS1R2  | NM_152232    |
| 566 | CACNA1I  | NM_021096    | 1830 | GPR12   | NM_005288    | 3093 | ORMDL3  | NM_139280    | 4357 | TAS1R3  | NM_152228    |
| 567 | CACNG1   | NM_000727    | 1831 | GPR132  | NM_013345    | 3094 | OS9     | NM_001017956 | 4358 | TAS2R10 | NM_023921    |
| 568 | CACNG2   | NM_006078    | 1832 | GPR132  | NM_013345    | 3095 | OS9     | NM_006812    | 4359 | TAS2R13 | NM_023920    |
| 569 | CACNG3   | NM_006539    | 1833 | GPR135  | NM_022571    | 3096 | OSBPL8  | NM_020841    | 4360 | TAS2R14 | NM_023922    |
| 570 | CACNG4   | NM_014405    | 1834 | GPR137B | NM_003272    | 3097 | OSMR    | NM_003999    | 4361 | TAS2R38 | NM_176817    |
| 571 | CACNG6   | NM_145814    | 1835 | GPR137C | NM_001099652 | 3098 | OSMR    | NM_001168355 | 4362 | TAS2R4  | NM_016944    |
| 572 | CACNG6   | NM_145814    | 1836 | GPR139  | NM_001002911 | 3099 | OSTC    | XM_034709    | 4363 | TAZ     | NM_181313    |
| 573 | CACNG7   | NM_031896    | 1837 | GPR141  | NM_181791    | 3100 | OSTC    | NM_021227    | 4364 | TAZ     | NM_000116    |
| 574 | CACNG8   | NM_031895    | 1838 | GPR142  | NM_181790    | 3101 | OSTM1   | NM_014028    | 4365 | TBC1D20 | NM_144628    |
| 575 | CADM2    | AL834270     | 1839 | GPR142  | NM_181790    | 3102 | OSTM1   | BC016376     | 4366 | TBL2    | NM_012453    |
| 576 | CADM3    | NM_001127173 | 1840 | GPR143  | NM_000273    | 3103 | OTOF    | NM_194248    | 4367 | TBXA2R  | NM_001060    |
| 577 | CADM3    | NM_021189    | 1841 | GPR146  | NM_138445    | 3104 | OXA1L   | NM_005015    | 4368 | TBXA2R  | NM_201636    |
| 578 | CADM4    | NM_145296    | 1842 | GPR146  | NM_138445    | 3105 | OXER1   | NM_148962    | 4369 | TBXA2R  | NM_010636    |
| 579 | CALCR    | NM_001742    | 1843 | GPR148  | NM_207364    | 3106 | OXGR1   | NM_080818    | 4370 | TCIRG1  | NM_006053    |
| 580 | CALCR    | NM_001164738 | 1844 | GPR148  | NM_207364    | 3107 | OXR1    | NM_000916    | 4371 | TCTA    | NM_022171    |
| 581 | CALCRL   | NM_005795    | 1845 | GPR149  | NM_001038705 | 3108 | P2RX1   | NM_002558    | 4372 | TCTN3   | NM_015631    |
| 582 | CALHM1   | NM_001001412 | 1846 | GPR15   | NM_005290    | 3109 | P2RX2   | NM_170682    | 4373 | TDFG1   | NM_003212    |
| 583 | CALHM2   | NM_015916    | 1847 | GPR150  | NM_199243    | 3110 | P2RX2   | NM_170683    | 4374 | TDRKH   | NM_006862    |
| 584 | CALN1    | NM_031468    | 1848 | GPR151  | NM_194251    | 3111 | P2RX3   | NM_002559    | 4375 | TECR    | NM_138501    |
| 585 | CALN1    | NM_031468    | 1849 | GPR152  | NM_206997    | 3112 | P2RX4   | NM_002560    | 4376 | TEK     | NM_000459    |
| 586 | CALY     | NM_015722    | 1850 | GPR155  | NM_152529    | 3113 | P2RX4   | NM_002560    | 4377 | TEK     | NM_000459    |
| 587 | CALY     | NM_015722    | 1851 | GPR158  | NM_020752    | 3114 | P2RX4   | NM_002560    | 4378 | TENM3   | NM_001080477 |
| 588 | CAMP     | NM_004345    | 1852 | GPR160  | NM_014373    | 3115 | P2RX5   | NM_175081    | 4379 | TEX2    | NM_018469    |
| 589 | CANX     | NM_001024649 | 1853 | GPR161  | AK091271     | 3116 | P2RX5   | NM_002561    | 4380 | TEX261  | NM_144582    |
| 590 | CANX     | NM_001746    | 1854 | GPR161  | NM_153832    | 3117 | P2RX6   | NM_005446    | 4381 | TEX264  | NM_015926    |
| 591 | CASC4    | NM_177974    | 1855 | GPR162  | NM_019858    | 3118 | P2RX6   | NM_005446    | 4382 | TEX264  | NM_015926    |
| 592 | CASD1    | NM_022900    | 1856 | GPR162  | NM_014449    | 3119 | P2RX7   | NM_002562    | 4383 | TEX28   | NM_001586    |
| 593 | CASR     | NM_000388    | 1857 | GPR17   | NM_005291    | 3120 | P2RX7   | AB209709     | 4384 | TFR2    | NM_003227    |
| 594 | CASR     | NM_001178065 | 1858 | GPR17   | NM_001161416 | 3121 | P2RY1   | NM_002563    | 4385 | TFRC    | NM_003234    |
| 595 | CATSPER2 | NM_172095    | 1859 | GPR171  | NM_013308    | 3122 | P2RY10  | NM_014499    | 4386 | TFRC    | NM_003234    |
| 596 | CATSPER2 | NM_172097    | 1860 | GPR173  | NM_018969    | 3123 | P2RY10  | NM_014499    | 4387 | TFRC    | NM_003234    |
| 597 | CATSPER2 | NM_172097    | 1861 | GPR174  | NM_032553    | 3124 | P2RY11  | BC009877     | 4388 | TGFA    | NM_003236    |
| 598 | CATSPER2 | NM_054020    | 1862 | GPR176  | NM_007223    | 3125 | P2RY12  | NM_022788    | 4389 | TGFA    | NM_003236    |
| 599 | CATSPER3 | NM_178019    | 1863 | GPR179  | NM_001004334 | 3126 | P2RY12  | NM_176876    | 4390 | TGFB2   | NM_001135599 |
| 600 | CAV1     | NM_001753    | 1864 | GPR18   | NM_005292    | 3127 | P2RY13  | NM_176894    | 4391 | TGFB2   | NM_003238    |
| 601 | CAV2     | NM_001233    | 1865 | GPR182  | NM_007264    | 3128 | P2RY13  | NM_023914    | 4392 | TGFB3   | NM_003239    |
| 602 | CAV3     | NM_001234    | 1866 | GPR183  | NM_004951    | 3129 | P2RY14  | NM_001081455 | 4393 | TGFB1   | NM_000358    |
| 603 | CAV3     | NM_033337    | 1867 | GPR183  | NM_004951    | 3130 | P2RY14  | NM_014879    | 4394 | TGFB1   | NM_004612    |
| 604 | CBARP    | NM_152769    | 1868 | GPR19   | NM_006143    | 3131 | P2RY2   | NM_002564    | 4395 | TGFB2   | NM_003242    |
| 605 | CCDC107  | NM_174923    | 1869 | GPR20   | NM_005293    | 3132 | P2RY2   | NM_176072    | 4396 | TGFB2   | NM_001024847 |
| 606 | CCDC107  | BC018758     | 1870 | GPR21   | NM_005294    | 3133 | P2RY6   | NM_004154    | 4397 | TGFB2   | NM_003242    |
| 607 | CCDC126  | NM_138771    | 1871 | GPR22   | NM_005295    | 3134 | P2RY6   | NM_176797    | 4398 | TGFB3   | NM_003243    |
| 608 | CCDC126  | NM_138771    | 1872 | GPR25   | NM_005298    | 3135 | P2RY6   | NM_176797    | 4399 | TGOLN2  | NM_006464    |
| 609 | CCDC167  | NM_138493    | 1873 | GPR26   | NM_153442    | 3136 | P2RY6   | NM_176796    | 4400 | TGOLN2  | BC028219     |
| 610 | CCDC51   | NM_024661    | 1874 | GPR27   | NM_018971    | 3137 | P2RY6   | NM_176798    | 4401 | TGOLN2  | NM_006464    |
| 611 | CCDC51   | BC004341     | 1875 | GPR3    | NM_005281    | 3138 | P2RY8   | NM_178129    | 4402 | THBD    | NM_000361    |
| 612 | CCDC90B  | NM_021825    | 1876 | GPR3    | BC032702     | 3139 | P4HTM   | NM_177938    | 4403 | THEM6   | NM_016647    |
| 613 | CKAR     | NM_000730    | 1877 | GPR31   | NM_005299    | 3140 | P4HTM   | NM_177939    | 4404 | THSD1   | NM_018676    |
| 614 | CKBR     | NM_176875    | 1878 | GPR32   | NM_001506    | 3141 | PAG1    | NM_018440    | 4405 | TIE1    | NM_005424    |
| 615 | CCL11    | NM_002986    | 1879 | GPR34   | NM_005300    | 3142 | PAG1    | AK094546     | 4406 | TIE1    | NM_005424    |
| 616 | CCL15    | NM_032965    | 1880 | GPR35   | NM_001195382 | 3143 | PAM     | NM_138822    | 4407 | TIGIT   | NM_173799    |
| 617 | CCL15    | NM_004167    | 1881 | GPR35   | NM_005301    | 3144 | PAM     | NM_000919    | 4408 | TIMD4   | NM_138379    |
| 618 | CCL22    | NM_002990    | 1882 | GPR37   | NM_005302    | 3145 | PAM     | NM_138821    | 4409 | TIMM17A | NM_006335    |
| 619 | CCL24    | NM_002991    | 1883 | GPR37   | BC040007     | 3146 | PANX1   | NM_015368    | 4410 | TIMM17B | NM_005834    |
| 620 | CCL4L1   | NM_207007    | 1884 | GPR37L1 | NM_004767    | 3147 | PANX1   | XM_012038    | 4411 | TIMM17B | NM_005834    |
| 621 | CCL5     | AK092450     | 1885 | GPR39   | NM_001508    | 3148 | PANX2   | NM_052839    | 4412 | TIMM21  | NM_014177    |
| 622 | CCL5     | AK094877     | 1886 | GPR4    | NM_005282    | 3149 | PAQR5   | NM_017705    | 4413 | TIMM21  | NM_014177    |
| 623 | CCL5     | BC009519     | 1887 | GPR45   | NM_007227    | 3150 | PAQR6   | NM_198406    | 4414 | TIMM22  | NM_013337    |
| 624 | CCL5     | BC003528     | 1888 | GPR50   | NM_004224    | 3151 | PAQR6   | AK095143     | 4415 | TIMM23B | AK098044     |
| 625 | CCL5     | BC007399     | 1889 | GPR52   | NM_005684    | 3152 | PAQR6   | NM_024897    | 4416 | TIMMDC1 | NM_016589    |
| 626 | CCL5     | NM_001278736 | 1890 | GPR55   | NM_005683    | 3153 | PAQR7   | NM_178422    | 4417 | TIMMDC1 | NM_016589    |
| 627 | CCL5     | NM_002985    | 1891 | GPR6    | NM_005284    | 3154 | PAQR8   | NM_133367    | 4418 | TLCD1   | NM_138463    |
| 628 | CCR1     | NM_001295    | 1892 | GPR61   | NM_031936    | 3155 | PAQR9   | NM_198504    | 4419 | TLR1    | NM_003263    |
| 629 | CCR10    | NM_016602    | 1893 | GPR61   | NM_031936    | 3156 | PARL    | NM_001037639 | 4420 | TLR10   | NM_030956    |
| 630 | CCR2     | NM_000647    | 1894 | GPR62   | BC026357     | 3157 | PARL    | NM_018622    | 4421 | TLR2    | NM_003264    |
| 631 | CCR2     | NM_000648    | 1895 | GPR62   | NM_080865    | 3158 | PARM1   | NM_015393    | 4422 | TLR3    | NM_003265    |
| 632 | CCR2     | NM_001123396 | 1896 | GPR63   | NM_030784    | 3159 | PARP16  | NM_017851    | 4423 | TLR4    | NM_138554    |
| 633 | CCR2     | NM_001123041 | 1897 | GPR65   | NM_003608    | 3160 | PCDH1   | NM_032420    | 4424 | TLR4    | NM_138556    |
| 634 | CCR3     | NM_178329    | 1898 | GPR68   | NM_003485    | 3161 | PCDH1   | NM_002587    | 4425 | TLR4    | NM_138554    |
| 635 | CCR3     | NM_001837    | 1899 | GPR68   | NM_001177676 | 3162 | PCDH10  | NM_032961    | 4426 | TLR5    | NM_003268    |
| 636 | CCR4     | NM_005508    | 1900 | GPR75   | NM_006794    | 3163 | PCDH11Y | NM_032973    | 4427 | TLR5    | XM_086576    |
| 637 | CCR5     | NM_000579    | 1901 | GPR78   | NM_080819    | 3164 | PCDH11Y | NM_032971    | 4428 | TLR6    | NM_006068    |
| 638 | CCR5     | NM_001100168 | 1902 | GPR82   | NM_080817    | 3165 | PCDH12  | NM_016580    | 4429 | TLR7    | NM_016562    |
| 639 | CCR6     | NM_031409    | 1903 | GPR83   | NM_016540    | 3166 | PCDH18  | NM_019035    | 4430 | TLR9    | NM_017442    |
| 640 | CCR6     | NM_004367    | 1904 | GPR84   | NM_020370    | 3167 | PCDH19  | NM_020766    | 4431 | TM2D1   | NM_032027    |
| 641 | CCR7     | NM_001838    | 1905 | GPR85   | NM_018970    | 3168 | PCDH20  | NM_022843    | 4432 | TM2D2   | NM_031940    |
| 642 | CCR8     | NM_005201    | 1906 | GPR87   | BC009540     | 3169 | PCDH21  | BC038799     | 4433 | TM2D2   | NM_078473    |
| 643 | CCR9     | NM_006641    | 1907 | GPR87   | NM_023915    | 3170 | PCDH7   | NM_002589    | 4434 | TM2D3   | NM_078474    |
| 644 | CCR9     | NM_031200    | 1908 | GPR88   | NM_022049    | 3171 | PCDH9   | NM_203487    | 4435 | TM2D3   | NM_025141    |
| 645 | CCR9     | NM_031200    | 1909 | GPR89A  | NM_001097613 | 3172 | PCDHA11 | NM_018902    | 4436 | TM4SF1  | BC034145     |
| 646 | CCRL2    | NM_003965    | 1910 | GPR89B  | NM_016334    | 3173 | PCDHA11 | NM_031861    | 4437 | TM4SF1  | NM_014220    |
| 647 | CCRL2    | NM_001130910 | 1911 | GPRC5A  | NM_003979    | 3174 | PCDHA4  | NM_018907    | 4438 | TM4SF1  | XM_171047    |
| 648 | CD101    | NM_004258    | 1912 | GPRC5C  | NM_022036    | 3175 | PCDHA4  | NM_031500    | 4439 | TM4SF18 | NM_138786    |
| 649 | CD151    | NM_004357    | 1913 | GPRC5C  | NM_022036    | 3176 | PCDHA5  | NM_018908    | 4440 | TM4SF18 | NM_138786    |
| 650 | CD151    | NM_139030    | 1914 | GPRC5D  | NM_018654    | 3177 | PCDHA9  | NM_031857    | 4441 | TM4SF19 | NM_138461    |

|     |          |              |      |         |              |      |          |              |      |          |              |
|-----|----------|--------------|------|---------|--------------|------|----------|--------------|------|----------|--------------|
| 651 | CD151    | NM_139030    | 1915 | GPRC5D  | NM_018654    | 3178 | PCDHAC2  | NM_018899    | 4442 | TM4SF20  | NM_024795    |
| 652 | CD163    | NM_004244    | 1916 | GPRC6A  | NM_148963    | 3179 | PCDHB10  | NM_018930    | 4443 | TM4SF4   | NM_004617    |
| 653 | CD163L1  | NM_174941    | 1917 | GPX8    | NM_001008397 | 3180 | PCDHB12  | NM_018932    | 4444 | TM4SF4   | BC001386     |
| 654 | CD164    | NM_006016    | 1918 | GPX8    | NM_001008397 | 3181 | PCDHB14  | NM_018934    | 4445 | TM4SF5   | NM_003963    |
| 655 | CD180    | NM_005582    | 1919 | GRAMD1A | NM_020895    | 3182 | PCDHB15  | NM_018935    | 4446 | TM6SF1   | AK055438     |
| 656 | CD19     | NM_001178098 | 1920 | GRAMD1A | NM_020895    | 3183 | PCDHB16  | NM_020957    | 4447 | TM6SF1   | NM_023003    |
| 657 | CD19     | NM_001770    | 1921 | GRAMD1B | NM_020716    | 3184 | PCDHB2   | NM_018936    | 4448 | TM6SF2   | NM_001001524 |
| 658 | CD1A     | BC031645     | 1922 | GRAMD1C | NM_017577    | 3185 | PCDHB3   | NM_018937    | 4449 | TM7SF2   | NM_003273    |
| 659 | CD1C     | NM_001765    | 1923 | GRAMD3  | NM_023927    | 3186 | PCDHB4   | NM_018938    | 4450 | TM7SF2   | NM_003273    |
| 660 | CD1D     | NM_001766    | 1924 | GRAMD3  | NM_023927    | 3187 | PCDHB5   | NM_015669    | 4451 | TM7SF3   | NM_016551    |
| 661 | CD1E     | NM_030893    | 1925 | GRHL1   | NM_014552    | 3188 | PCDHB7   | NM_018940    | 4452 | TM9SF1   | NM_006405    |
| 662 | CD2      | NM_001767    | 1926 | GRIA1   | NM_000827    | 3189 | PCDHB9   | NM_019119    | 4453 | TM9SF1   | NM_006405    |
| 663 | CD200    | NM_001004196 | 1927 | GRIA1   | NM_001114183 | 3190 | PCDHGA11 | NM_032092    | 4454 | TM9SF2   | NM_004800    |
| 664 | CD200    | NM_005944    | 1928 | GRIA2   | NM_001083619 | 3191 | PCDHGA2  | NM_032009    | 4455 | TM9SF3   | NM_020123    |
| 665 | CD200R1  | NM_170780    | 1929 | GRIA2   | NM_000826    | 3192 | PCDHGB7  | NM_018927    | 4456 | TM9SF4   | NM_014742    |
| 666 | CD200R1  | NM_138939    | 1930 | GRIA3   | NM_181894    | 3193 | PCDHGC3  | NM_002588    | 4457 | TMBIM1   | NM_022152    |
| 667 | CD200R1  | AF497550     | 1931 | GRIA3   | NM_007325    | 3194 | PCDHGC3  | NM_032403    | 4458 | TMBIM1   | NM_022152    |
| 668 | CD200R1  | NM_138806    | 1932 | GRIA3   | NM_000828    | 3195 | PCDHGC5  | NM_018929    | 4459 | TMBIM6   | NM_003217    |
| 669 | CD200R1L | NM_001008784 | 1933 | GRIA3   | BC032004     | 3196 | PCNX2    | NM_014801    | 4460 | TMC4     | NM_144686    |
| 670 | CD207    | NM_015717    | 1934 | GRIA4   | NM_000829    | 3197 | PCSK1N   | NM_013271    | 4461 | TMC6     | NM_007267    |
| 671 | CD22     | NM_001771    | 1935 | GRIA4   | NM_001077243 | 3198 | PCSK7    | NM_004716    | 4462 | TMC6     | NM_007267    |
| 672 | CD22     | NM_001771    | 1936 | GRIK1   | NM_000830    | 3199 | PCSK7    | NM_004716    | 4463 | TMC7     | NM_024847    |
| 673 | CD24     | BC064619     | 1937 | GRIK1   | NM_175611    | 3200 | PDCD1    | NM_005018    | 4464 | TMC8     | NM_152468    |
| 674 | CD244    | NM_016382    | 1938 | GRIK2   | NM_021956    | 3201 | PDCD1LG2 | NM_025239    | 4465 | TMC3C    | NM_020698    |
| 675 | CD244    | NM_016382    | 1939 | GRIK2   | NM_175768    | 3202 | PDE3A    | NM_000921    | 4466 | TMCO1    | NM_019026    |
| 676 | CD247    | NM_000734    | 1940 | GRIK2   | NM_175768    | 3203 | PDE3B    | NM_000922    | 4467 | TMCO2    | NM_001008740 |
| 677 | CD247    | NM_198053    | 1941 | GRIK3   | NM_000831    | 3204 | PDGFRA   | NM_006206    | 4468 | TMCO3    | NM_017905    |
| 678 | CD248    | NM_020404    | 1942 | GRIK3   | NM_000831    | 3205 | PDGFRA   | NM_006206    | 4469 | TMCO4    | NM_181719    |
| 679 | CD27     | NM_001242    | 1943 | GRIN1   | NM_007327    | 3206 | PDGFRB   | NM_002609    | 4470 | TMED1    | NM_006858    |
| 680 | CD274    | NM_014143    | 1944 | GRIN1   | NM_000832    | 3207 | PDI4A    | NM_004911    | 4471 | TMED10   | NM_006827    |
| 681 | CD276    | NM_001024736 | 1945 | GRIN2A  | NM_000833    | 3208 | PDPN     | NM_198389    | 4472 | TMED2    | NM_006815    |
| 682 | CD28     | NM_006139    | 1946 | GRIN2A  | NM_001134407 | 3209 | PDPN     | NM_006474    | 4473 | TMED3    | NM_007364    |
| 683 | CD28     | NM_001243077 | 1947 | GRIN2A  | NM_001134408 | 3210 | PDPN     | NM_001006624 | 4474 | TMED4    | NM_182547    |
| 684 | CD300A   | NM_007261    | 1948 | GRIN2B  | NM_000834    | 3211 | PDKZ1IP1 | NM_005764    | 4475 | TMED5    | NM_016040    |
| 685 | CD300C   | NM_006678    | 1949 | GRIN2C  | NM_000835    | 3212 | PEAR1    | NM_001080471 | 4476 | TMED6    | NM_144676    |
| 686 | CD300E   | NM_181449    | 1950 | GRIN2D  | NM_000836    | 3213 | PECAM1   | NM_000442    | 4477 | TMED7    | NM_181836    |
| 687 | CD300LB  | NM_174892    | 1951 | GRIN3A  | NM_133445    | 3214 | PEMT     | NM_148173    | 4478 | TMED9    | NM_017510    |
| 688 | CD300LD  | NM_001115152 | 1952 | GRIN3B  | NM_138690    | 3215 | PEMT     | NM_007169    | 4479 | TMEFF1   | NM_003692    |
| 689 | CD300LF  | NM_139018    | 1953 | GRINA   | NM_000837    | 3216 | PEMT     | NM_148172    | 4480 | TMEFF1   | NM_003692    |
| 690 | CD300LG  | NM_145273    | 1954 | GRM1    | NM_000838    | 3217 | PERP     | NM_022121    | 4481 | TMEFF2   | NM_016192    |
| 691 | CD302    | NM_014880    | 1955 | GRM2    | NM_000839    | 3218 | PEX10    | NM_153818    | 4482 | TMEM100  | NM_018286    |
| 692 | CD320    | NM_016579    | 1956 | GRM3    | NM_000840    | 3219 | PEX10    | NM_002617    | 4483 | TMEM106A | NM_145041    |
| 693 | CD33     | NM_001772    | 1957 | GRM4    | NM_000841    | 3220 | PEX10    | NM_002617    | 4484 | TMEM106B | NM_018374    |
| 694 | CD33     | NM_001082618 | 1958 | GRM5    | NM_001143831 | 3221 | PEX11A   | NM_003847    | 4485 | TMEM106C | NM_024056    |
| 695 | CD34     | NM_001773    | 1959 | GRM6    | NM_000843    | 3222 | PEX11A   | NM_003847    | 4486 | TMEM106C | NM_024056    |
| 696 | CD34     | NM_001025109 | 1960 | GRM7    | NM_000844    | 3223 | PEX11B   | NM_003846    | 4487 | TMEM108  | NM_023943    |
| 697 | CD36     | NM_001001548 | 1961 | GRM7    | NM_181874    | 3224 | PEX11B   | NM_003846    | 4488 | TMEM109  | NM_024092    |
| 698 | CD36     | NM_001001547 | 1962 | GRM8    | NM_000845    | 3225 | PEX2     | NM_001079867 | 4489 | TMEM109  | NM_024092    |
| 699 | CD36     | NM_000072    | 1963 | GRPR    | NM_005314    | 3226 | PEX2     | NM_000318    | 4490 | TMEM110  | NM_198563    |
| 700 | CD37     | NM_001774    | 1964 | GSG1L   | NM_144675    | 3227 | PF4      | NM_002619    | 4491 | TMEM115  | NM_007024    |
| 701 | CD38     | NM_001775    | 1965 | GSPT1   | NM_002094    | 3228 | PGAM5    | NM_138575    | 4492 | TMEM117  | NM_032256    |
| 702 | CD3E     | NM_000733    | 1966 | GSPT1   | NM_002094    | 3229 | PGAM5    | NM_001170543 | 4493 | TMEM119  | NM_181724    |
| 703 | CD3G     | NM_000073    | 1967 | GUCY2C  | NM_004963    | 3230 | PGAP3    | NM_033419    | 4494 | TMEM120A | NM_031925    |
| 704 | CD4      | NM_000616    | 1968 | GUCY2F  | NM_001522    | 3231 | PGRMC1   | NM_006667    | 4495 | TMEM120B | AK094258     |
| 705 | CD40     | NM_152854    | 1969 | GUSB    | NM_000181    | 3232 | PGRMC2   | NM_006320    | 4496 | TMEM121  | NM_025268    |
| 706 | CD40     | NM_001250    | 1970 | GYLTL1B | NM_152312    | 3233 | PH       | NM_017732    | 4497 | TMEM123  | BD123550     |
| 707 | CD40LG   | NM_000074    | 1971 | GYPA    | NM_002099    | 3234 | PHOX     | NM_000444    | 4498 | TMEM123  | NM_052932    |
| 708 | CD44     | NM_001001389 | 1972 | GYPC    | NM_002101    | 3235 | PHTF1    | NM_006608    | 4499 | TMEM125  | NM_144626    |
| 709 | CD44     | NM_001001391 | 1973 | GZMK    | NM_002104    | 3236 | PH16     | NM_153370    | 4500 | TMEM126A | NM_032273    |
| 710 | CD44     | NM_001001391 | 1974 | GZMM    | NM_005317    | 3237 | PH16     | NM_153370    | 4501 | TMEM126B | BC017574     |
| 711 | CD44     | NM_000610    | 1975 | HACD1   | NM_014241    | 3238 | PI3      | NM_002638    | 4502 | TMEM127  | NM_017849    |
| 712 | CD44     | NM_001001390 | 1976 | HAMP    | NM_021175    | 3239 | PIGA     | NM_020473    | 4503 | TMEM128  | NM_032927    |
| 713 | CD44     | NM_001001392 | 1977 | HAS1    | BC035837     | 3240 | PIGC     | NM_153747    | 4504 | TMEM130  | NM_152913    |
| 714 | CD44     | NM_001202556 | 1978 | HAS1    | NM_001523    | 3241 | PIGC     | NM_002642    | 4505 | TMEM132A | NM_178031    |
| 715 | CD44     | NM_001202557 | 1979 | HAS3    | NM_138612    | 3242 | PIGC     | NM_153747    | 4506 | TMEM132D | NM_133448    |
| 716 | CD44     | NM_001202555 | 1980 | HAVCR1  | NM_012206    | 3243 | PIGF     | NM_002643    | 4507 | TMEM133  | NM_032021    |
| 717 | CD46     | NM_172360    | 1981 | HAVCR2  | NM_032782    | 3244 | PIGF     | NM_173074    | 4508 | TMEM135  | NM_022918    |
| 718 | CD46     | NM_172351    | 1982 | HAVCR2  | BC020843     | 3245 | PIGG     | NM_017733    | 4509 | TMEM135  | BC030952     |
| 719 | CD46     | NM_002389    | 1983 | HBEGF   | NM_001945    | 3246 | PIGG     | BD127295     | 4510 | TMEM138  | NM_016464    |
| 720 | CD46     | NM_153826    | 1984 | HCAR1   | NM_032554    | 3247 | PIGH     | NM_004569    | 4511 | TMEM139  | NM_153345    |
| 721 | CD47     | NM_001777    | 1985 | HCAR2   | NM_177551    | 3248 | PIGK     | NM_005482    | 4512 | TMEM139  | NM_153345    |
| 722 | CD47     | NM_198793    | 1986 | HCAR3   | NM_006018    | 3249 | PIGK     | NM_005482    | 4513 | TMEM140  | NM_018295    |
| 723 | CD48     | BC030224     | 1987 | HCN1    | XM_094383    | 3250 | PIGL     | NM_004278    | 4514 | TMEM141  | NM_032928    |
| 724 | CD48     | NM_001778    | 1988 | HCN1    | NM_021072    | 3251 | PIGM     | NM_145167    | 4515 | TMEM143  | NM_018273    |
| 725 | CD5      | NM_014207    | 1989 | HCN2    | NM_001194    | 3252 | PIGN     | NM_176787    | 4516 | TMEM144  | NM_018342    |
| 726 | CD52     | NM_001803    | 1990 | HCN3    | NM_020897    | 3253 | PIGN     | NM_012327    | 4517 | TMEM145  | NM_173633    |
| 727 | CD53     | NM_000560    | 1991 | HCN4    | NM_005477    | 3254 | PIGO     | NM_152850    | 4518 | TMEM146  | BC031233     |
| 728 | CD58     | NM_001779    | 1992 | HCRT    | NM_001524    | 3255 | PIGO     | NM_032634    | 4519 | TMEM147  | NM_032635    |
| 729 | CD6      | BC033755     | 1993 | HCRTR1  | NM_001525    | 3256 | PIGO     | NM_152850    | 4520 | TMEM14B  | NM_030969    |
| 730 | CD63     | NM_001780    | 1994 | HCST    | NM_014266    | 3257 | PIGP     | NM_153682    | 4521 | TMEM14C  | NM_016642    |
| 731 | CD63     | NM_001780    | 1995 | HEPH    | NM_138737    | 3258 | PIGP     | NM_153682    | 4522 | TMEM14C  | BC010086     |
| 732 | CD68     | NM_001251    | 1996 | HEPH    | NM_014799    | 3259 | PIGP     | AB039659     | 4523 | TMEM150A | NM_001031738 |
| 733 | CD68     | BC015557     | 1997 | HERPUD2 | NM_022373    | 3260 | PIGQ     | NM_148920    | 4524 | TMEM150A | NM_153342    |
| 734 | CD69     | NM_001781    | 1998 | HERPUD2 | NM_022373    | 3261 | PIGQ     | BC010094     | 4525 | TMEM150B | NM_001085488 |
| 735 | CD7      | NM_006137    | 1999 | HEXB    | NM_000521    | 3262 | PIGQ     | NM_004204    | 4526 | TMEM154  | NM_152680    |
| 736 | CD70     | NM_001252    | 2000 | HFE     | NM_139005    | 3263 | PIGR     | NM_002644    | 4527 | TMEM156  | NM_024943    |
| 737 | CD72     | NM_001782    | 2001 | HFE     | NM_000410    | 3264 | PIGT     | NM_015937    | 4528 | TMEM159  | NM_001301775 |
| 738 | CD74     | NM_001025158 | 2002 | HFE2    | NM_145277    | 3265 | PIGT     | NM_015937    | 4529 | TMEM160  | NM_017854    |
| 739 | CD74     | NM_004355    | 2003 | HFE2    | NM_213653    | 3266 | PIGU     | NM_080476    | 4530 | TMEM161A | NM_017814    |
| 740 | CD74     | NM_001025159 | 2004 | HFE2    | NM_202004    | 3267 | PIGV     | NM_017837    | 4531 | TMEM161B | NM_153354    |
| 741 | CD79A    | NM_001783    | 2005 | HGF     | NM_000601    | 3268 | PIGX     | NM_017861    | 4532 | TMEM163  | NM_030923    |
| 742 | CD79A    | NM_021601    | 2006 | HGF     | NM_001010933 | 3269 | PIGX     | AK000529     | 4533 | TMEM164  | NM_017698    |
| 743 | CD79B    | NM_001039933 | 2007 | HGF     | NM_001010931 | 3270 | PIK3IP1  | NM_052880    | 4534 | TMEM164  | NM_032227    |



|     |          |              |      |          |              |      |         |              |      |          |              |
|-----|----------|--------------|------|----------|--------------|------|---------|--------------|------|----------|--------------|
| 744 | CD79B    | NM_000626    | 2008 | HGF      | NM_001010934 | 3271 | PIK3IP1 | NM_001135911 | 4535 | TMEM165  | NM_018475    |
| 745 | CD80     | NM_005191    | 2009 | HHAT     | NM_018194    | 3272 | PILRA   | NM_178272    | 4536 | TMEM165  | NM_018475    |
| 746 | CD81     | NM_004356    | 2010 | HHLA2    | NM_007072    | 3273 | PILRA   | NM_178273    | 4537 | TMEM167A | NM_174909    |
| 747 | CD81     | NM_001297649 | 2011 | HHLA2    | NM_001282557 | 3274 | PILRA   | NM_013439    | 4538 | TMEM167A | NM_174909    |
| 748 | CD82     | NM_002231    | 2012 | HIGD1A   | NM_014056    | 3275 | PILRB   | NM_013440    | 4539 | TMEM167B | NM_020141    |
| 749 | CD82     | NM_001024844 | 2013 | HIGD1B   | NM_016438    | 3276 | PIPOX   | NM_016518    | 4540 | TMEM168  | NM_022484    |
| 750 | CD82     | NM_002231    | 2014 | HIGD2A   | NM_138820    | 3277 | PKD2    | NM_000297    | 4541 | TMEM169  | NM_138390    |
| 751 | CD83     | NM_001040280 | 2015 | HILPDA   | NM_013332    | 3278 | PKD2L1  | NM_016112    | 4542 | TMEM169  | NM_138390    |
| 752 | CD83     | NM_004233    | 2016 | HLA      | NM_002116    | 3279 | PLA2G16 | NM_007069    | 4543 | TMEM17   | NM_198276    |
| 753 | CD84     | NM_001184879 | 2017 | HLA      | NM_002121    | 3280 | PLA2G2A | NM_000300    | 4544 | TMEM170A | NM_145254    |
| 754 | CD84     | NM_003874    | 2018 | HLA      | NM_006120    | 3281 | PLA2G2D | NM_012400    | 4545 | TMEM171  | NM_173490    |
| 755 | CD86     | NM_175862    | 2019 | HLA      | NM_019111    | 3282 | PLA2R1  | NM_001007267 | 4546 | TMEM175  | NM_032326    |
| 756 | CD86     | NM_006889    | 2020 | HLA      | NM_022555    | 3283 | PLA2R1  | NM_007366    | 4547 | TMEM176A | NM_018487    |
| 757 | CD8A     | NM_001768    | 2021 | HLA      | BC008403     | 3284 | PLB1    | BC065041     | 4548 | TMEM176B | NM_014020    |
| 758 | CD8A     | NM_171827    | 2022 | HLA      | BC001023     | 3285 | PLB2    | NM_173542    | 4549 | TMEM178A | NM_152390    |
| 759 | CD8A     | NM_001768    | 2023 | HLA      | BC008611     | 3286 | PLD3    | NM_001031696 | 4550 | TMEM18   | AL137269     |
| 760 | CD8B     | NM_004931    | 2024 | HLA      | BC012106     | 3287 | PLD4    | NM_138790    | 4551 | TMEM18   | NM_152834    |
| 761 | CD8B     | NM_172102    | 2025 | HLA      | BC009956     | 3288 | PLGRKT  | NM_018465    | 4552 | TMEM181  | BC021687     |
| 762 | CD8B     | NM_172101    | 2026 | HLA      | BC033827     | 3289 | PLGRKT  | NM_018465    | 4553 | TMEM182  | NM_144632    |
| 763 | CD9      | NM_001769    | 2027 | HLA      | NM_002127    | 3290 | PLLP    | NM_015993    | 4554 | TMEM183A | NM_138391    |
| 764 | CD9      | NM_001769    | 2028 | HLA      | NM_002125    | 3291 | PLN     | NM_002667    | 4555 | TMEM183A | BC013073     |
| 765 | CD93     | NM_012072    | 2029 | HLA      | BC015000     | 3292 | PLP1    | NM_199478    | 4556 | TMEM183A | NM_138391    |
| 766 | CD96     | NM_005816    | 2030 | HLA      | NM_002124    | 3293 | PLP1    | NM_000533    | 4557 | TMEM184A | BC026694     |
| 767 | CD96     | NM_198196    | 2031 | HLA      | NM_001243965 | 3294 | PLP2    | NM_002668    | 4558 | TMEM184B | NM_012264    |
| 768 | CD99     | NM_002414    | 2032 | HLA      | NM_019111    | 3295 | PLPP1   | NM_176895    | 4559 | TMEM184C | NM_018241    |
| 769 | CD99L2   | NM_031462    | 2033 | HLA      | NM_033554    | 3296 | PLPP1   | NM_003711    | 4560 | TMEM185A | NM_032508    |
| 770 | CDPC1    | NM_022842    | 2034 | HLA      | NM_002118    | 3297 | PLPP2   | NM_003712    | 4561 | TMEM186  | NM_015421    |
| 771 | CDH1     | NM_004360    | 2035 | HLA      | NM_022555    | 3298 | PLPP2   | NM_003712    | 4562 | TMEM186  | NM_015421    |
| 772 | CDH10    | NM_006727    | 2036 | HLA      | NM_002121    | 3299 | PLPP3   | NM_003713    | 4563 | TMEM187  | NM_003492    |
| 773 | CDH11    | NM_001797    | 2037 | HLA      | NM_002119    | 3300 | PLPP3   | NM_003713    | 4564 | TMEM187  | NM_003492    |
| 774 | CDH15    | NM_004933    | 2038 | HLA      | NM_002122    | 3301 | PLPP5   | NM_032483    | 4565 | TMEM189  | NM_199129    |
| 775 | CDH16    | NM_004063    | 2039 | HLA      | NM_002117    | 3302 | PLPP7   | NM_032728    | 4566 | TMEM196  | NM_152774    |
| 776 | CDH17    | NM_004063    | 2040 | HLA      | NM_005514    | 3303 | PLPPR1  | NM_017753    | 4567 | TMEM198  | NM_001303098 |
| 777 | CDH18    | NM_004934    | 2041 | HLA-A    | XM_175163    | 3304 | PLPPR2  | NM_022737    | 4568 | TMEM199  | NM_152464    |
| 778 | CDH2     | NM_001792    | 2042 | HLA-DOB  | NM_002120    | 3305 | PLPPR3  | BC017295     | 4569 | TMEM199  | BC033113     |
| 779 | CDH22    | NM_021248    | 2043 | HLA-DOB  | BC020226     | 3306 | PLVAP   | NM_031310    | 4570 | TMEM2    | NM_013390    |
| 780 | CDH23    | NM_052836    | 2044 | HLA-DQB1 | NM_002123    | 3307 | PLXDC2  | NM_032812    | 4571 | TMEM200A | NM_052913    |
| 781 | CDH26    | NM_177980    | 2045 | HLA-DRB4 | NM_021983    | 3308 | PLXNA1  | NM_032242    | 4572 | TMEM200A | NM_012264    |
| 782 | CDH3     | NM_001793    | 2046 | HLA-E    | NM_005516    | 3309 | PLXNC1  | NM_005761    | 4573 | TMEM203  | NM_053045    |
| 783 | CDH4     | NM_001794    | 2047 | HLA-E    | NM_005516    | 3310 | PM20D1  | NM_152491    | 4574 | TMEM204  | NM_024600    |
| 784 | CDH8     | NM_001796    | 2048 | HLA-F    | NM_018950    | 3311 | PM3CH   | BC018048     | 4575 | TMEM205  | NM_198536    |
| 785 | CDH9     | NM_016279    | 2049 | HM13     | NM_030789    | 3312 | PMEL    | NM_006928    | 4576 | TMEM206  | NM_018252    |
| 786 | CDHR1    | NM_001171971 | 2050 | HM13     | NM_178582    | 3313 | PMEPA1  | NM_199170    | 4577 | TMEM207  | NM_207316    |
| 787 | CDHR3    | NM_152750    | 2051 | HM13     | NM_178581    | 3314 | PMEPA1  | NM_020182    | 4578 | TMEM208  | NM_014187    |
| 788 | CDIP1    | NM_013399    | 2052 | HMGCR    | NM_000859    | 3315 | PMP22   | NM_153322    | 4579 | TMEM209  | NM_032842    |
| 789 | CDIPT    | NM_006319    | 2053 | HMGCR    | NM_001130996 | 3316 | PMP22   | NM_000304    | 4580 | TMEM213  | AK024390     |
| 790 | CDKAL1   | NM_017774    | 2054 | HMOX1    | NM_002133    | 3317 | PMP22   | NM_153321    | 4581 | TMEM215  | NM_212558    |
| 791 | CDON     | NM_016952    | 2055 | HMOX1    | NM_002133    | 3318 | PNKD    | NM_022572    | 4582 | TMEM217  | NM_145316    |
| 792 | CDS1     | NM_001263    | 2056 | HMOX2    | NM_002134    | 3319 | PNKD    | NM_015488    | 4583 | TMEM217  | BC029657     |
| 793 | CDS2     | NM_003818    | 2057 | HMP19    | NM_015980    | 3320 | PNKD    | BC021118     | 4584 | TMEM219  | NM_194280    |
| 794 | CDS2     | NM_003818    | 2058 | HMP19    | NM_015980    | 3321 | PNPLA2  | NM_020376    | 4585 | TMEM222  | NM_032125    |
| 795 | CEACAM1  | NM_001712    | 2059 | HP       | NM_005143    | 3322 | PNPLA2  | NM_020376    | 4586 | TMEM223  | BC001204     |
| 796 | CEACAM3  | NM_001815    | 2060 | HP       | BC058031     | 3323 | PNPLA2  | BC017280     | 4587 | TMEM230  | NM_014145    |
| 797 | CEACAM4  | NM_001817    | 2061 | HP       | NM_001126102 | 3324 | PNPLA6  | NM_006702    | 4588 | TMEM230  | NM_001009925 |
| 798 | CECR1    | NM_017424    | 2062 | HPN      | NM_002151    | 3325 | PNPLA6  | NM_006702    | 4589 | TMEM230  | NM_014145    |
| 799 | CECR1    | NM_017424    | 2063 | HPN      | NM_002151    | 3326 | PNPLA7  | NM_152286    | 4590 | TMEM230  | AF161392     |
| 800 | CEND1    | NM_016564    | 2064 | HRASLS2  | NM_017878    | 3327 | PODXL   | NM_001018111 | 4591 | TMEM234  | NM_019118    |
| 801 | CEPT1    | NM_001007794 | 2065 | HRH1     | NM_001098211 | 3328 | PODXL   | NM_005397    | 4592 | TMEM237  | NM_152388    |
| 802 | CEPT1    | NM_006090    | 2066 | HRH1     | NM_000861    | 3329 | PODXL2  | NM_015720    | 4593 | TMEM241  | NM_032933    |
| 803 | CERS2    | NM_022075    | 2067 | HRH2     | NM_022304    | 3330 | POMK    | NM_032237    | 4594 | TMEM242  | NM_018452    |
| 804 | CERS2    | NM_022075    | 2068 | HRH2     | NM_001131055 | 3331 | POMT1   | NM_007171    | 4595 | TMEM243  | NM_024315    |
| 805 | CERS2    | NM_181746    | 2069 | HRH2     | NM_022304    | 3332 | POMT2   | NM_013382    | 4596 | TMEM245  | NM_032012    |
| 806 | CERS4    | NM_024552    | 2070 | HRH3     | NM_007232    | 3333 | PON3    | NM_000940    | 4597 | TMEM246  | NM_032342    |
| 807 | CERS4    | NM_024552    | 2071 | HRH4     | NM_021624    | 3334 | POPDC3  | NM_022361    | 4598 | TMEM248  | NM_017994    |
| 808 | CERS5    | NM_147190    | 2072 | HRK      | NM_003806    | 3335 | POR     | NM_000941    | 4599 | TMEM248  | NM_017994    |
| 809 | CFTR     | NM_000492    | 2073 | HS3ST2   | NM_006043    | 3336 | POR     | NM_000941    | 4600 | TMEM25   | NM_001144034 |
| 810 | CGRRF1   | NM_006568    | 2074 | HS3ST3B1 | NM_006041    | 3337 | PORCN   | NM_022825    | 4601 | TMEM25   | NM_032780    |
| 811 | CGRRF1   | NM_006568    | 2075 | HS6ST1   | NM_004807    | 3338 | PORCN   | NM_203475    | 4602 | TMEM251  | NM_001098621 |
| 812 | CH25H    | NM_003956    | 2076 | HS6ST2   | NM_001077188 | 3339 | PORCN   | NM_022825    | 4603 | TMEM252  | NM_153237    |
| 813 | CHIC2    | NM_012110    | 2077 | HS6ST2   | NM_147175    | 3340 | PPAP2B  | NM_177414    | 4604 | TMEM254  | NM_025125    |
| 814 | CHIT1    | NM_003465    | 2078 | HS6ST3   | NM_153456    | 3341 | PPAP2C  | NM_177526    | 4605 | TMEM255A | NM_017938    |
| 815 | CHL1     | NM_006614    | 2079 | HSD11B1  | NM_005525    | 3342 | PPIB    | NM_000942    | 4606 | TMEM255B | NM_182614    |
| 816 | CHODL    | NM_024944    | 2080 | HSD11B1  | NM_181755    | 3343 | PPIC    | NM_000943    | 4607 | TMEM256  | NM_152766    |
| 817 | CHPT1    | NM_002044    | 2081 | HSD11B1  | NM_005525    | 3344 | PPT2    | NM_005155    | 4608 | TMEM258  | NM_014206    |
| 818 | CHRFAM7A | NM_148911    | 2082 | HSD17B12 | NM_016142    | 3345 | PPT2    | NM_138717    | 4609 | TMEM259  | NM_033420    |
| 819 | CHRFAM7A | NM_139320    | 2083 | HSD17B13 | NM_178135    | 3346 | PQLC1   | NM_025078    | 4610 | TMEM26   | NM_178505    |
| 820 | CHRM1    | NM_000738    | 2084 | HSD17B2  | NM_002153    | 3347 | PQLC2   | NM_001040126 | 4611 | TMEM261  | XM_372075    |
| 821 | CHRM1    | BC007740     | 2085 | HSD17B3  | NM_000197    | 3348 | PQLC3   | NM_152391    | 4612 | TMEM263  | NM_152261    |
| 822 | CHRM2    | NM_001006627 | 2086 | HSD3B1   | NM_000862    | 3349 | PRADC1  | NM_032319    | 4613 | TMEM266  | NM_152335    |
| 823 | CHRM2    | NM_000739    | 2087 | HSD3B2   | NM_000198    | 3350 | PRAF2   | NM_007213    | 4614 | TMEM27   | NM_020665    |
| 824 | CHRM2    | NM_001006630 | 2088 | HSD3B7   | NM_025193    | 3351 | PRCP    | NM_199418    | 4615 | TMEM30A  | NM_018247    |
| 825 | CHRM3    | NM_000740    | 2089 | HSPA13   | NM_006948    | 3352 | PRCP    | NM_005040    | 4616 | TMEM30B  | NM_001017970 |
| 826 | CHRM5    | NM_012125    | 2090 | HTR1A    | NM_000524    | 3353 | PREB    | NM_013388    | 4617 | TMEM31   | NM_182541    |
| 827 | CHRNA1   | NM_001039523 | 2091 | HTR1B    | NM_000863    | 3354 | PRIMA1  | NM_178013    | 4618 | TMEM33   | NM_018126    |
| 828 | CHRNA1   | NM_000079    | 2092 | HTR1D    | NM_000864    | 3355 | PRLHR   | NM_004248    | 4619 | TMEM33   | NM_018126    |
| 829 | CHRNA10  | NM_020402    | 2093 | HTR1D    | BC007720     | 3356 | PRLR    | NM_000949    | 4620 | TMEM35   | NM_021637    |
| 830 | CHRNA2   | NM_000742    | 2094 | HTR1E    | NM_000865    | 3357 | PRND    | NM_012409    | 4621 | TMEM37   | NM_183240    |
| 831 | CHRNA3   | NM_000743    | 2095 | HTR1F    | NM_000866    | 3358 | PRNP    | NM_183079    | 4622 | TMEM38A  | NM_024074    |
| 832 | CHRNA3   | BC006114     | 2096 | HTR2A    | NM_000621    | 3359 | PRNP    | NM_000311    | 4623 | TMEM38B  | NM_018112    |
| 833 | CHRNA4   | NM_000744    | 2097 | HTR2A    | NM_001165947 | 3360 | PROCR   | NM_006404    | 4624 | TMEM38B  | NM_018112    |
| 834 | CHRNA5   | NM_000745    | 2098 | HTR2B    | NM_000867    | 3361 | PROKR1  | NM_138964    | 4625 | TMEM39A  | NM_018266    |
| 835 | CHRNA5   | NM_000745    | 2099 | HTR2C    | NM_000868    | 3362 | PROKR2  | NM_144773    | 4626 | TMEM40   | NM_018306    |
| 836 | CHRNA6   | NM_004198    | 2100 | HTR3A    | NM_213621    | 3363 | PROM1   | NM_006017    | 4627 | TMEM41A  | NM_080652    |

|     |         |              |      |         |              |      |         |              |      |           |              |
|-----|---------|--------------|------|---------|--------------|------|---------|--------------|------|-----------|--------------|
| 837 | CHRNA6  | BC014456     | 2101 | HTR3A   | NM_000869    | 3364 | PROM1   | NM_001145847 | 4628 | TMEM43    | NM_024334    |
| 838 | CHRNA7  | NM_000746    | 2102 | HTR3B   | NM_006028    | 3365 | PROM2   | NM_144707    | 4629 | TMEM45A   | NM_018004    |
| 839 | CHRNA9  | NM_017581    | 2103 | HTR3C   | NM_130770    | 3366 | PRPH2   | NM_000322    | 4630 | TMEM45B   | NM_138788    |
| 840 | CHRNA1  | NM_000747    | 2104 | HTR3C   | NM_130770    | 3367 | PRR7    | NM_030567    | 4631 | TMEM45B   | NM_138788    |
| 841 | CHRNA2  | NM_000748    | 2105 | HTR3C   | NM_130770    | 3368 | PRR7    | BC004261     | 4632 | TMEM47    | NM_031442    |
| 842 | CHRNA3  | NM_000749    | 2106 | HTR3D   | NM_182537    | 3369 | PRRG1   | NM_000950    | 4633 | TMEM5     | NM_014254    |
| 843 | CHRNA4  | NM_000750    | 2107 | HTR3D   | NM_001163646 | 3370 | PRRG2   | BC026032     | 4634 | TMEM5     | NM_014254    |
| 844 | CHRNA5  | NM_000751    | 2108 | HTR3E   | NM_182589    | 3371 | PRRG4   | NM_024081    | 4635 | TMEM50A   | NM_014313    |
| 845 | CHST1   | NM_003654    | 2109 | HTR4    | NM_199453    | 3372 | PRRG4   | BC010052     | 4636 | TMEM50B   | AL355685     |
| 846 | CHST10  | NM_004854    | 2110 | HTR4    | NM_001040172 | 3373 | PRRT1   | NM_030651    | 4637 | TMEM50B   | NM_006134    |
| 847 | CHST10  | NM_004854    | 2111 | HTR4    | NM_000870    | 3374 | PRRT2   | NM_145239    | 4638 | TMEM52    | NM_178545    |
| 848 | CHST11  | NM_018413    | 2112 | HTR4    | NM_001040171 | 3375 | PRTG    | NM_173814    | 4639 | TMEM52B   | NM_153022    |
| 849 | CHST12  | NM_018641    | 2113 | HTR4    | NM_001040169 | 3376 | PSEN1   | NM_000021    | 4640 | TMEM53    | NM_024587    |
| 850 | CHST13  | NM_152889    | 2114 | HTR5A   | NM_024012    | 3377 | PSEN2   | NM_012486    | 4641 | TMEM54    | NM_033504    |
| 851 | CHST15  | NM_015892    | 2115 | HTR6    | NM_000871    | 3378 | PSEN2   | NM_000447    | 4642 | TMEM55A   | NM_018710    |
| 852 | CHST2   | NM_004267    | 2116 | HTR7    | NM_000872    | 3379 | PSEN2   | NM_012486    | 4643 | TMEM55B   | NM_144568    |
| 853 | CHST3   | NM_004273    | 2117 | HTRA2   | NM_013247    | 3380 | PSENE1  | NM_172341    | 4644 | TMEM56    | NM_152487    |
| 854 | CHST4   | NM_005769    | 2118 | HTRA2   | NM_013247    | 3381 | PSENE1  | NM_172341    | 4645 | TMEM57    | NM_018202    |
| 855 | CHST7   | NM_019886    | 2119 | HTRA4   | NM_153692    | 3382 | PTAFR   | NM_000952    | 4646 | TMEM57    | NM_018202    |
| 856 | CHST8   | NM_0022467   | 2120 | HVCN1   | NM_032369    | 3383 | PTAFR   | NM_000952    | 4647 | TMEM59    | NM_004872    |
| 857 | CHST9   | NM_031422    | 2121 | HVCN1   | BC009731     | 3384 | PTCH1   | NM_000264    | 4648 | TMEM59    | NM_004872    |
| 858 | CHSY1   | NM_014918    | 2122 | ICAM1   | NM_000201    | 3385 | PTCHD1  | NM_173495    | 4649 | TMEM59L   | NM_012109    |
| 859 | CISD1   | NM_018464    | 2123 | ICAM2   | NM_000873    | 3386 | PTCRA   | NM_138296    | 4650 | TMEM59L   | NM_012109    |
| 860 | CISD2   | NM_001008388 | 2124 | ICAM3   | NM_002162    | 3387 | PTDSS1  | NM_014754    | 4651 | TMEM60    | NM_032936    |
| 861 | CISD2   | BC032300     | 2125 | ICAM3   | NM_002162    | 3388 | PTDSS2  | NM_030783    | 4652 | TMEM62    | NM_024956    |
| 862 | CKAP4   | NM_006825    | 2126 | ICAM4   | NM_001544    | 3389 | PTGDR   | NM_000953    | 4653 | TMEM62    | NM_024956    |
| 863 | CKLF    | NM_181640    | 2127 | ICAM4   | BC000046     | 3390 | PTGDR2  | NM_004778    | 4654 | TMEM63A   | NM_014698    |
| 864 | CKLF    | NM_016326    | 2128 | ICAM5   | NM_003259    | 3391 | PTGER1  | NM_000955    | 4655 | TMEM63A   | NM_014698    |
| 865 | CKLF    | NM_016951    | 2129 | ICMT    | NM_012405    | 3392 | PTGER2  | NM_000956    | 4656 | TMEM63A   | AB007958     |
| 866 | CLCA2   | NM_006536    | 2130 | ICOS    | NM_012092    | 3393 | PTGER3  | NM_198716    | 4657 | TMEM63C   | NM_020431    |
| 867 | CLCA2   | NM_006536    | 2131 | ICOSLG  | NM_015259    | 3394 | PTGER3  | NM_198716    | 4658 | TMEM65    | NM_194291    |
| 868 | CLCA4   | NM_012128    | 2132 | IER3IP1 | NM_016097    | 3395 | PTGER3  | NM_000957    | 4659 | TMEM67    | NM_153704    |
| 869 | LCC1    | NM_015127    | 2133 | IFI27   | BC015492     | 3396 | PTGER3  | NM_198718    | 4660 | TMEM68    | AL832935     |
| 870 | LCC1    | NM_015127    | 2134 | IFI27   | NM_001130080 | 3397 | PTGER3  | NM_198715    | 4661 | TMEM68    | NM_152417    |
| 871 | LCC1    | NM_015127    | 2135 | IFI27   | NM_005532    | 3398 | PTGER3  | NM_198714    | 4662 | TMEM69    | NM_016486    |
| 872 | CLCN1   | NM_000083    | 2136 | IFI27L1 | NM_145249    | 3399 | PTGER3  | NM_198717    | 4663 | TMEM70    | NM_017866    |
| 873 | CLCN2   | NM_004366    | 2137 | IFI27L2 | NM_032036    | 3400 | PTGER4  | NM_000958    | 4664 | TMEM71    | NM_144649    |
| 874 | CLCN3   | NM_173872    | 2138 | IFI6    | NM_002038    | 3401 | PTGES   | NM_004878    | 4665 | TMEM71    | NM_144649    |
| 875 | CLCN3   | NM_001829    | 2139 | IFI6    | NM_022873    | 3402 | PTGFR   | NM_000959    | 4666 | TMEM74    | BC033057     |
| 876 | CLCN4   | NM_001830    | 2140 | IFITM1  | NM_003641    | 3403 | PTGFRN  | NM_020440    | 4667 | TMEM79    | NM_032323    |
| 877 | CLCN5   | NM_000084    | 2141 | IFITM2  | NM_006435    | 3404 | PTGIR   | NM_000960    | 4668 | TMEM80    | NM_174940    |
| 878 | CLCN6   | NM_021735    | 2142 | IFITM3  | NM_021034    | 3405 | PTGIR   | BC017857     | 4669 | TMEM80    | BC008671     |
| 879 | CLCN7   | NM_001287    | 2143 | IFITM5  | NM_001025295 | 3406 | PTGIR   | NM_000960    | 4670 | TMEM86B   | NM_173804    |
| 880 | CLCN7   | NM_001287    | 2144 | IFNAR1  | NM_000629    | 3407 | PTGIS   | NM_000961    | 4671 | TMEM87A   | BC005335     |
| 881 | CLCN7   | NM_001287    | 2145 | IFNAR1  | NM_000629    | 3408 | PTGS1   | NM_000962    | 4672 | TMEM87A   | NM_015497    |
| 882 | CLCNKA  | NM_004070    | 2146 | IFNAR2  | NM_207584    | 3409 | PTH1R   | NM_000316    | 4673 | TMEM87B   | NM_032824    |
| 883 | CLCNKB  | BC020873     | 2147 | IFNAR2  | NM_207585    | 3410 | PTH2R   | NM_005048    | 4674 | TMEM8A    | NM_021259    |
| 884 | CLDN1   | NM_021101    | 2148 | IFNAR2  | NM_000874    | 3411 | PTH2R   | NM_005048    | 4675 | TMEM8C    | NM_001080483 |
| 885 | CLDN10  | NM_006984    | 2149 | IFNB1   | NM_002176    | 3412 | PTK7    | NM_152880    | 4676 | TMEM9     | AK094588     |
| 886 | CLDN11  | NM_005602    | 2150 | IFNE    | NM_176891    | 3413 | PTK7    | NM_002821    | 4677 | TMEM9     | NM_016456    |
| 887 | CLDN12  | NM_012129    | 2151 | IFNGR1  | NM_000416    | 3414 | PTN     | NM_002825    | 4678 | TMEM92    | NM_153229    |
| 888 | CLDN14  | NM_012130    | 2152 | IFNGR1  | NM_000416    | 3415 | PTN     | NM_002825    | 4679 | TMEM97    | NM_014573    |
| 889 | CLDN15  | NM_014343    | 2153 | IFNGR2  | NM_005534    | 3416 | PTPN1   | NM_002827    | 4680 | TMEM97    | NM_014573    |
| 890 | CLDN16  | NM_006580    | 2154 | IFNK    | NM_020124    | 3417 | PTPN2   | NM_080423    | 4681 | TMEM98    | NM_015544    |
| 891 | CLDN17  | NM_012131    | 2155 | IFNL1   | NM_172140    | 3418 | PTPN5   | NM_032781    | 4682 | TMEM98    | NM_015544    |
| 892 | CLDN18  | NM_016369    | 2156 | IFNL2   | NM_172138    | 3419 | PTPN5   | NM_006906    | 4683 | TMEM99    | NM_145274    |
| 893 | CLDN18  | NM_001002026 | 2157 | IFNL3   | NM_172139    | 3420 | PTPRA   | NM_002836    | 4684 | TMEM9B    | NM_020644    |
| 894 | CLDN19  | BC030524     | 2158 | IFNLR1  | AK097877     | 3421 | PTPRA   | NM_080841    | 4685 | TMIE      | NM_147196    |
| 895 | CLDN19  | NM_148960    | 2159 | IFNLR1  | AK094159     | 3422 | PTPRA   | NM_080840    | 4686 | TMPO      | NM_003276    |
| 896 | CLDN2   | NM_020384    | 2160 | IFNLR1  | NM_170743    | 3423 | PTPRC   | NM_080922    | 4687 | TMPO      | AF113682     |
| 897 | CLDN2   | BC071747     | 2161 | IGDCC3  | NM_004884    | 3424 | PTPRC   | NM_080921    | 4688 | TMPRSS11D | NM_004262    |
| 898 | CLDN20  | NM_001001346 | 2162 | IGF1R   | NM_000875    | 3425 | PTPRC   | NM_080921    | 4689 | TMPRSS12  | NM_182559    |
| 899 | CLDN22  | NM_001111319 | 2163 | IGF1R   | NM_000875    | 3426 | PTPRC   | NM_002838    | 4690 | TMPRSS15  | NM_002772    |
| 900 | CLDN3   | NM_001306    | 2164 | IGF2R   | NM_000876    | 3427 | PTPRC   | NM_001267798 | 4691 | TMPRSS2   | NM_005656    |
| 901 | CLDN4   | NM_001305    | 2165 | IGFL1   | NM_198541    | 3428 | PTPRCAP | NM_005608    | 4692 | TMPRSS2   | NM_005656    |
| 902 | CLDN5   | NM_001130861 | 2166 | IGFLR1  | NM_024660    | 3429 | PTPRD   | NM_130393    | 4693 | TMPRSS2   | NM_005656    |
| 903 | CLDN5   | NM_003277    | 2167 | IGLON5  | NM_001101372 | 3430 | PTPRD   | NM_130392    | 4694 | TMPRSS2   | NM_005656    |
| 904 | CLDN6   | NM_021195    | 2168 | IGSF11  | NM_152538    | 3431 | PTPRD   | NM_002839    | 4695 | TMPRSS3   | NM_032401    |
| 905 | CLDN7   | NM_001307    | 2169 | IGSF11  | AL834256     | 3432 | PTPRE   | NM_130435    | 4696 | TMPRSS3   | NM_032405    |
| 906 | CLDN8   | NM_199328    | 2170 | IGSF11  | NM_152538    | 3433 | PTPRE   | NM_006504    | 4697 | TMPRSS3   | NM_024022    |
| 907 | CLDN9   | NM_0020982   | 2171 | IGSF23  | NM_001205280 | 3434 | PTPRF   | NM_130440    | 4698 | TMPRSS4   | NM_019894    |
| 908 | CLDND1  | NM_019895    | 2172 | IGSF6   | NM_005849    | 3435 | PTPRF   | NM_002840    | 4699 | TMPRSS4   | NM_183247    |
| 909 | CLDND2  | NM_152353    | 2173 | IGSF8   | NM_052868    | 3436 | PTPRF   | NM_130440    | 4700 | TMPRSS6   | NM_153609    |
| 910 | CLEC10A | NM_182906    | 2174 | IHH     | NM_002181    | 3437 | PTPRH   | NM_002842    | 4701 | TMPRSS6   | NM_001289001 |
| 911 | CLEC12A | NM_201623    | 2175 | IL10RA  | NM_001558    | 3438 | PTPRJ   | NM_002843    | 4702 | TMPRSS9   | NM_182973    |
| 912 | CLEC12A | NM_138337    | 2176 | IL10RB  | NM_000628    | 3439 | PTPRK   | NM_002844    | 4703 | TMTC1     | NM_175861    |
| 913 | CLEC14A | NM_175060    | 2177 | IL11RA  | NM_004512    | 3440 | PTPRK   | NM_001135648 | 4704 | TMTC2     | NM_152588    |
| 914 | CLEC14A | NM_175060    | 2178 | IL12B   | NM_002187    | 3441 | PTPRM   | NM_002845    | 4705 | TMTC3     | NM_181783    |
| 915 | CLEC1A  | NM_016511    | 2179 | IL12RB1 | NM_005535    | 3442 | PTPRM   | NM_001105244 | 4706 | TMTC4     | AK056409     |
| 916 | CLEC1B  | NM_016509    | 2180 | IL12RB2 | NM_001559    | 3443 | PTPRN   | BC007713     | 4707 | TMUB1     | NM_031434    |
| 917 | CLEC2D  | NM_013269    | 2181 | IL13    | NM_002188    | 3444 | PTPRN   | NM_002846    | 4708 | TMUB2     | NM_177441    |
| 918 | CLEC4A  | NM_194447    | 2182 | IL13RA1 | NM_001560    | 3445 | PTPRO   | NM_030670    | 4709 | TMUB2     | NM_177441    |
| 919 | CLEC4A  | NM_194450    | 2183 | IL13RA2 | NM_000640    | 3446 | PTPRO   | NM_030669    | 4710 | TMX1      | NM_030755    |
| 920 | CLEC4A  | NM_194448    | 2184 | IL17RA  | NM_014339    | 3447 | PTPRO   | NM_030667    | 4711 | TMX2      | NM_015959    |
| 921 | CLEC4A  | NM_016184    | 2185 | IL17RB  | NM_018725    | 3448 | PTPRO   | NM_002848    | 4712 | TMX2      | NM_015959    |
| 922 | CLEC4C  | NM_130441    | 2186 | IL17RB  | NM_018725    | 3449 | PTPRR   | NM_130846    | 4713 | TMX3      | NM_019022    |
| 923 | CLEC4D  | NM_080387    | 2187 | IL17RC  | NM_153463    | 3450 | PTPRR   | NM_002849    | 4714 | TMX4      | NM_021156    |
| 924 | CLEC4E  | NM_014358    | 2188 | IL17RC  | NM_032732    | 3451 | PTPRS   | BC029496     | 4715 | TMX4      | BC021964     |
| 925 | CLEC4G  | NM_198492    | 2189 | IL17RC  | NM_153461    | 3452 | PTPRS   | NM_130854    | 4716 | TNC       | NM_002160    |
| 926 | CLEC4M  | NM_014257    | 2190 | IL17RC  | NM_153460    | 3453 | PTPRS   | NM_130853    | 4717 | TNF       | NM_000594    |
| 927 | CLEC5A  | NM_013252    | 2191 | IL17RE  | NM_153480    | 3454 | PTPRS   | NM_130853    | 4718 | TNFRSF10A | NM_003844    |
| 928 | CLEC6A  | NM_001007033 | 2192 | IL18R1  | NM_003855    | 3455 | PTPRZ1  | NM_002851    | 4719 | TNFRSF10A | NM_003844    |
| 929 | CLEC7A  | NM_197947    | 2193 | IL18RAP | NM_003853    | 3456 | PTRH2   | NM_016077    | 4720 | TNFRSF10B | NM_003842    |

|      |         |              |      |         |              |      |         |              |      |           |              |
|------|---------|--------------|------|---------|--------------|------|---------|--------------|------|-----------|--------------|
| 930  | CLEC7A  | NM_022570    | 2194 | IL1R1   | NM_000877    | 3457 | PTRH2   | AK057033     | 4721 | TNFRSF10B | NM_003842    |
| 931  | CLEC7A  | NM_197954    | 2195 | IL1R2   | NM_173343    | 3458 | PTTG1IP | NM_004339    | 4722 | TNFRSF10C | NM_003841    |
| 932  | CLEC9A  | NM_207345    | 2196 | IL1R2   | NM_004633    | 3459 | PVR     | NM_001135769 | 4723 | TNFRSF10D | NM_003840    |
| 933  | CLGN    | NM_004362    | 2197 | IL1RAP  | NM_134470    | 3460 | PVR     | NM_006505    | 4724 | TNFRSF11A | NM_003839    |
| 934  | CLMP    | NM_024769    | 2198 | IL1RAP  | NM_002182    | 3461 | PVRIG   | NM_024070    | 4725 | TNFRSF12A | NM_016639    |
| 935  | CLMP    | NM_024769    | 2199 | IL1RAP  | NM_002182    | 3462 | PVRL2   | NM_002856    | 4726 | TNFRSF13B | NM_012452    |
| 936  | CLN3    | NM_000086    | 2200 | IL1RL1  | NM_003856    | 3463 | PVRL3   | BC017572     | 4727 | TNFRSF13C | NM_052945    |
| 937  | CLN3    | AF077965     | 2201 | IL1RL1  | NM_016232    | 3464 | PVRL3   | NM_015480    | 4728 | TNFRSF14  | NM_003820    |
| 938  | CLN3    | NM_001042432 | 2202 | IL1RL2  | NM_003854    | 3465 | PXDN    | XM_056455    | 4729 | TNFRSF14  | NM_001297605 |
| 939  | CLN3    | NM_001286109 | 2203 | IL20RA  | NM_014432    | 3466 | PXMP2   | NM_018663    | 4730 | TNFRSF17  | NM_001192    |
| 940  | CLN6    | NM_017882    | 2204 | IL21R   | NM_181078    | 3467 | PXYLP1  | NM_152282    | 4731 | TNFRSF18  | NM_148901    |
| 941  | CLN8    | NM_018941    | 2205 | IL22    | NM_020525    | 3468 | PYY     | NM_004160    | 4732 | TNFRSF18  | NM_004195    |
| 942  | CLN8    | NM_018941    | 2206 | IL22    | NM_020525    | 3469 | QPCTL   | NM_017659    | 4733 | TNFRSF19  | NM_018647    |
| 943  | CLN8    | BC007725     | 2207 | IL22RA1 | NM_021258    | 3470 | QPCTL   | NM_017659    | 4734 | TNFRSF1A  | NM_001065    |
| 944  | CLPS    | NM_001832    | 2208 | IL22RA1 | NM_021258    | 3471 | QRFP1   | NM_198179    | 4735 | TNFRSF1A  | NM_001065    |
| 945  | CLPTM1  | NM_001294    | 2209 | IL23R   | NM_144701    | 3472 | QSOX1   | NM_002826    | 4736 | TNFRSF1B  | NM_001066    |
| 946  | CLPTM1L | NM_030782    | 2210 | IL25    | NM_022789    | 3473 | QSOX2   | NM_181701    | 4737 | TNFRSF21  | NM_014452    |
| 947  | CLPTM1L | NM_030782    | 2211 | IL27    | NM_145659    | 3474 | RABAC1  | NM_006423    | 4738 | TNFRSF25  | NM_148965    |
| 948  | CLRN1   | NM_174878    | 2212 | IL27RA  | NM_004843    | 3475 | RAET1E  | NM_139165    | 4739 | TNFRSF25  | NM_003790    |
| 949  | CLSTN1  | NM_014944    | 2213 | IL2RA   | NM_000417    | 3476 | RAET1L  | NM_130900    | 4740 | TNFRSF4   | NM_003327    |
| 950  | CLSTN2  | NM_022131    | 2214 | IL2RB   | NM_000878    | 3477 | RAMP1   | NM_005855    | 4741 | TNFRSF8   | NM_001243    |
| 951  | CMKLR1  | NM_004072    | 2215 | IL2RG   | NM_000206    | 3478 | RAMP2   | NM_005854    | 4742 | TNFRSF9   | NM_001561    |
| 952  | CMTM2   | NM_144673    | 2216 | IL31RA  | NM_001242638 | 3479 | RAMP2   | NM_005854    | 4743 | TNFSF10   | NM_003810    |
| 953  | CMTM3   | NM_144601    | 2217 | IL31RA  | NM_139017    | 3480 | RAMP3   | NM_005856    | 4744 | TNFSF10   | BC032722     |
| 954  | CMTM4   | NM_178818    | 2218 | IL3RA   | NM_002183    | 3481 | RARRES3 | NM_004585    | 4745 | TNFSF11   | NM_003701    |
| 955  | CMTM5   | NM_138460    | 2219 | IL5RA   | NM_175728    | 3482 | RCE1    | NM_005133    | 4746 | TNFSF11   | NM_0033012   |
| 956  | CMTM5   | BC013109     | 2220 | IL5RA   | NM_000564    | 3483 | RDH14   | NM_020905    | 4747 | TNFSF12   | NM_003809    |
| 957  | CMTM6   | NM_017801    | 2221 | IL6R    | NM_181359    | 3484 | RECK    | NM_021111    | 4748 | TNFSF13   | NM_003808    |
| 958  | CMTM7   | NM_138410    | 2222 | IL6R    | NM_000565    | 3485 | REEP1   | NM_022912    | 4749 | TNFSF13   | NM_172087    |
| 959  | CMTM7   | BC010116     | 2223 | IL6ST   | NM_002184    | 3486 | REEP1   | NM_022912    | 4750 | TNFSF13B  | NM_006573    |
| 960  | CMTM7   | NM_138410    | 2224 | IL7R    | NM_002185    | 3487 | REEP2   | NM_016606    | 4751 | TNFSF13B  | NM_006573    |
| 961  | CMTM8   | NM_178868    | 2225 | IL9R    | NM_002186    | 3488 | REEP3   | NM_001001330 | 4752 | TNFSF13B  | NM_001145645 |
| 962  | CNGA2   | NM_005140    | 2226 | ILDR1   | NM_175924    | 3489 | REEP4   | NM_025232    | 4753 | TNFSF14   | NM_172014    |
| 963  | CNGA3   | NM_001298    | 2227 | ILVBL   | NM_006844    | 3490 | REEP4   | NM_025232    | 4754 | TNFSF14   | NM_003807    |
| 964  | CNIH1   | NM_005776    | 2228 | IMPAD1  | AK090988     | 3491 | REEP5   | BC000232     | 4755 | TNFSF15   | NM_005118    |
| 965  | CNIH2   | NM_182553    | 2229 | IMPAD1  | NM_017813    | 3492 | REEP5   | NM_005669    | 4756 | TNFSF15   | NM_001204344 |
| 966  | CNIH3   | NM_152495    | 2230 | INPP4A  | BC005082     | 3493 | RELL2   | NM_173828    | 4757 | TNFSF18   | NM_005092    |
| 967  | CNIH4   | NM_014184    | 2231 | INPP4A  | NM_004027    | 3494 | RELL2   | BC009560     | 4758 | TNFSF4    | NM_003326    |
| 968  | CNNM2   | NM_017649    | 2232 | INPP4A  | NM_001566    | 3495 | RELT    | NM_152222    | 4759 | TNFSF4    | NM_001297562 |
| 969  | CNNM2   | NM_017649    | 2233 | INSIG1  | NM_198336    | 3496 | RELT    | NM_032871    | 4760 | TNFSF8    | NM_001244    |
| 970  | CNNM4   | NM_020184    | 2234 | INSIG1  | NM_005542    | 3497 | RELR1   | NM_007033    | 4761 | TNFSF9    | NM_003811    |
| 971  | CNR1    | NM_033181    | 2235 | INSIG2  | NM_016133    | 3498 | RET     | NM_020630    | 4762 | TOMM20    | NM_014765    |
| 972  | CNR1    | NM_016083    | 2236 | INSR    | NM_000208    | 3499 | RET     | NM_020975    | 4763 | TOMM22    | NM_020243    |
| 973  | CNR2    | NM_001841    | 2237 | INSR    | NM_000208    | 3500 | RETSAT  | NM_017750    | 4764 | TOMM7     | NM_019059    |
| 974  | CNTNAP1 | NM_003632    | 2238 | INSR    | NM_001079817 | 3501 | RETSAT  | AK075261     | 4765 | TOMM70    | NM_014820    |
| 975  | CNTNAP2 | NM_014141    | 2239 | INSRR   | NM_014215    | 3502 | RFNG    | NM_002917    | 4766 | TOR1B     | NM_014506    |
| 976  | CNTNAP3 | NM_033655    | 2240 | ITFG1   | NM_030790    | 3503 | RFT1    | NM_052859    | 4767 | TOR1B     | NM_014506    |
| 977  | COA1    | NM_018224    | 2241 | ITGA1   | NM_181501    | 3504 | RFT1    | NM_052859    | 4768 | TOR2A     | NM_001085347 |
| 978  | COA1    | BC012036     | 2242 | ITGA1   | XM_032902    | 3505 | RGR     | NM_002921    | 4769 | TP53I11   | NM_006034    |
| 979  | COA3    | NM_001040431 | 2243 | ITGA11  | NM_012211    | 3506 | RGR     | NM_002921    | 4770 | TP53I13   | NM_138349    |
| 980  | COL11A2 | NM_080680    | 2244 | ITGA11  | NM_012211    | 3507 | RGR     | BC008094     | 4771 | TP53I13   | NM_138349    |
| 981  | COL17A1 | NM_000494    | 2245 | ITGA2   | NM_002203    | 3508 | RHAG    | NM_000324    | 4772 | TPBG      | NM_006670    |
| 982  | COL25A1 | BC036669     | 2246 | ITGA2B  | NM_000419    | 3509 | RHBDD1  | NM_032276    | 4773 | TPCN1     | BC007419     |
| 983  | COL25A1 | NM_198721    | 2247 | ITGA4   | NM_000885    | 3510 | RHBDD1  | NM_032276    | 4774 | TPCN1     | AK093490     |
| 984  | COL26A1 | NM_001278563 | 2248 | ITGA5   | NM_002205    | 3511 | RHBDD2  | NM_001040456 | 4775 | TPCN1     | NM_017901    |
| 985  | COLEC12 | NM_130386    | 2249 | ITGA6   | NM_000210    | 3512 | RHBDD3  | NM_012265    | 4776 | TPO       | NM_000547    |
| 986  | COLQ    | NM_005677    | 2250 | ITGA6   | NM_001079818 | 3513 | RHBDD3  | BC002705     | 4777 | TPSG1     | NM_012467    |
| 987  | COMT    | NM_007310    | 2251 | ITGA7   | NM_002206    | 3514 | RHBDF1  | NM_022450    | 4778 | TPST2     | NM_001008566 |
| 988  | COMT    | NM_000754    | 2252 | ITGA9   | NM_002207    | 3515 | RHBDF1  | NM_022450    | 4779 | TPST2     | NM_003595    |
| 989  | COMT    | NM_007310    | 2253 | ITGAE   | NM_002208    | 3516 | RHBDF2  | NM_024599    | 4780 | TPTE      | NM_199259    |
| 990  | COMTD1  | NM_144589    | 2254 | ITGAL   | NM_002209    | 3517 | RHBDL1  | NM_001278720 | 4781 | TRAM1     | NM_014294    |
| 991  | COQ2    | NM_015697    | 2255 | ITGAL   | NM_001114380 | 3518 | RHBDL2  | BC013103     | 4782 | TRAM1L1   | NM_152402    |
| 992  | COQ2    | NM_015697    | 2256 | ITGAM   | NM_000632    | 3519 | RHBDL2  | NM_017821    | 4783 | TRAM2     | NM_012288    |
| 993  | CORIN   | NM_006587    | 2257 | ITGAV   | NM_002210    | 3520 | RHCG    | NM_016321    | 4784 | TRDN      | NM_006073    |
| 994  | CORIN   | NM_006587    | 2258 | ITGAX   | NM_000887    | 3521 | RHD     | NM_016124    | 4785 | TREM1     | NM_018643    |
| 995  | COX10   | NM_001303    | 2259 | ITGB1   | NM_002211    | 3522 | RHO     | NM_000539    | 4786 | TREM2     | NM_018965    |
| 996  | COX11   | NM_004375    | 2260 | ITGB1   | NM_033668    | 3523 | RHOT1   | NM_018307    | 4787 | TREM2     | BC032362     |
| 997  | COX14   | NM_032901    | 2261 | ITGB2   | NM_000211    | 3524 | RHOT2   | NM_138769    | 4788 | TREML2    | NM_024807.4  |
| 998  | COX15   | NM_078470    | 2262 | ITGB3   | NM_000212    | 3525 | RHC3    | NM_024557    | 4789 | TREX1     | NM_016381    |
| 999  | COX16   | NM_016468    | 2263 | ITGB5   | NM_002213    | 3526 | RMDN3   | NM_018145    | 4790 | TRHDE     | NM_013381    |
| 1000 | COX411  | NM_001861    | 2264 | ITGB6   | NM_000888    | 3527 | RMDN3   | NM_018145    | 4791 | TRHR      | NM_003301    |
| 1001 | COX412  | NM_032609    | 2265 | ITGB7   | NM_000889    | 3528 | RNASE1  | NM_198235    | 4792 | TRIM13    | NM_005798    |
| 1002 | COX6A1  | NM_004373    | 2266 | ITGB8   | NM_002214    | 3529 | RNASE1  | NM_198234    | 4793 | TRIM13    | NM_052811    |
| 1003 | COX6C   | NM_004374    | 2267 | ITIH1   | NM_002215    | 3530 | RNASE1  | NM_198232    | 4794 | TRIM59    | NM_173084    |
| 1004 | COX7A1  | NM_001864    | 2268 | ITM2A   | NM_004867    | 3531 | RNASE1  | NM_002933    | 4795 | TRPA1     | NM_007332    |
| 1005 | COX7A2  | NM_001865    | 2269 | ITM2A   | NM_004867    | 3532 | RNASE4  | NM_194431    | 4796 | TRPC1     | NM_003304    |
| 1006 | COX7A2L | NM_004718    | 2270 | ITM2B   | NM_021999    | 3533 | RNASE4  | NM_002937    | 4797 | TRPC3     | NM_003305    |
| 1007 | COX8A   | NM_004074    | 2271 | ITM2B   | NM_021999    | 3534 | RNASE6  | NM_005615    | 4798 | TRPC3     | NM_001130698 |
| 1008 | CPD     | NM_001304    | 2272 | ITM2C   | NM_001012516 | 3535 | RNASE7  | NM_032572    | 4799 | TRPC4     | NM_001135955 |
| 1009 | CPT1A   | NM_001031847 | 2273 | ITM2C   | NM_001012514 | 3536 | RNASEK  | NM_001004333 | 4800 | TRPC4     | NM_016179    |
| 1010 | CPT1A   | NM_001876    | 2274 | ITM2C   | NM_030926    | 3537 | RNASEK  | NM_001004333 | 4801 | TRPC5     | NM_012471    |
| 1011 | CPT1B   | NM_004377    | 2275 | ITPR3   | NM_002224    | 3538 | RNF103  | NM_005667    | 4802 | TRPC6     | NM_004621    |
| 1012 | CPT1C   | NM_001136052 | 2276 | IYD     | NM_203395    | 3539 | RNF112  | NM_007148    | 4803 | TRPC6     | XM_116465    |
| 1013 | CPT1C   | NM_152359    | 2277 | IZUMO2  | NM_152358    | 3540 | RNF121  | NM_018320    | 4804 | TRPM4     | NM_017636    |
| 1014 | CPXM2   | NM_198148    | 2278 | JAG1    | NM_000214    | 3541 | RNF128  | NM_194463    | 4805 | TRPM5     | NM_014555    |
| 1015 | CR2     | NM_001006658 | 2279 | JAG2    | NM_002226    | 3542 | RNF128  | NM_024539    | 4806 | TRPM6     | NM_017662    |
| 1016 | CRB1    | NM_201253    | 2280 | JAGN1   | NM_032492    | 3543 | RNF13   | NM_183384    | 4807 | TRPM8     | NM_024080    |
| 1017 | CRB3    | NM_174881    | 2281 | JAM2    | NM_021219    | 3544 | RNF13   | NM_183381    | 4808 | TRPM8     | BC001135     |
| 1018 | CRB3    | NM_139161    | 2282 | JAM3    | NM_032801    | 3545 | RNF13   | NM_007282    | 4809 | TRPV1     | NM_018727    |
| 1019 | CREG1   | NM_003851    | 2283 | JKAMP   | NM_016475    | 3546 | RNF13   | NM_007282    | 4810 | TRPV1     | NM_080704    |
| 1020 | CRELD1  | NM_001031717 | 2284 | JKAMP   | NM_016475    | 3547 | RNF130  | NM_018434    | 4811 | TRPV1     | NM_080705    |
| 1021 | CRELD1  | NM_001077415 | 2285 | JPH2    | NM_020433    | 3548 | RNF133  | NM_139175    | 4812 | TRPV2     | NM_016113    |
| 1022 | CRELD1  | NM_015513    | 2286 | JTB     | NM_006694    | 3549 | RNF139  | NM_007218    | 4813 | TRPV2     | NM_016113    |



|      |           |              |      |        |              |      |         |              |      |         |              |
|------|-----------|--------------|------|--------|--------------|------|---------|--------------|------|---------|--------------|
| 1023 | CRHR1     | NM_001145146 | 2287 | JTB    | NM_006694    | 3550 | RNF144A | NM_014746    | 4814 | TRPV4   | NM_147204    |
| 1024 | CRHR1     | NM_004382    | 2288 | KCNA1  | NM_000217    | 3551 | RNF144B | AJ420555     | 4815 | TRPV4   | NM_147204    |
| 1025 | CRHR2     | NM_001883    | 2289 | KCNA10 | NM_005549    | 3552 | RNF144B | NM_182757    | 4816 | TRPV4   | NM_021625    |
| 1026 | CRHR2     | NM_001202475 | 2290 | KCNA2  | NM_004974    | 3553 | RNF149  | NM_173647    | 4817 | TRPV4   | NM_001177428 |
| 1027 | CRIM1     | NM_016441    | 2291 | KCNA2  | BC043564     | 3554 | RNF150  | AB033040     | 4818 | TRPV5   | NM_019841    |
| 1028 | CRISPLD2  | NM_031476    | 2292 | KCNA3  | NM_002232    | 3555 | RNF167  | NM_015528    | 4819 | TRPV6   | NM_018646    |
| 1029 | CRLF2     | NM_022148    | 2293 | KCNA3  | NM_002232    | 3556 | RNF167  | NM_015528    | 4820 | TSHR    | NM_000369    |
| 1030 | CRLF2     | NM_001012288 | 2294 | KCNA4  | NM_002233    | 3557 | RNF175  | NM_173662    | 4821 | TSHR    | NM_001142626 |
| 1031 | CRLS1     | NM_019095    | 2295 | KCNA5  | NM_002234    | 3558 | RNF182  | NM_152737    | 4822 | TSPAN1  | NM_005727    |
| 1032 | CRTAM     | NM_019604    | 2296 | KCNA6  | NM_002235    | 3559 | RNF183  | NM_145051    | 4823 | TSPAN10 | NM_031945    |
| 1033 | CRTAP     | NM_006371    | 2297 | KCNA7  | NM_031886    | 3560 | RNF185  | NM_152267    | 4824 | TSPAN12 | NM_012338    |
| 1034 | CSF1      | NM_172210    | 2298 | KCNB1  | NM_004975    | 3561 | RNF19A  | NM_015435    | 4825 | TSPAN13 | NM_014399    |
| 1035 | CSF1      | NM_172212    | 2299 | KCNB2  | NM_004770    | 3562 | RNF19A  | NM_183419    | 4826 | TSPAN13 | NM_014399    |
| 1036 | CSF1      | NM_000577    | 2300 | KCNC1  | NM_004976    | 3563 | RNF24   | NM_007219    | 4827 | TSPAN14 | NM_030927    |
| 1037 | CSF1      | NM_172211    | 2301 | KCNC1  | NM_001112741 | 3564 | RNF26   | NM_032015    | 4828 | TSPAN15 | NM_012339    |
| 1038 | CSF1R     | NM_005211    | 2302 | KCNC1  | NM_004976    | 3565 | RNF43   | NM_017763    | 4829 | TSPAN18 | NM_001031730 |
| 1039 | CSF1R     | NM_005211    | 2303 | KCNC3  | NM_004977    | 3566 | RNF43   | NM_017763    | 4830 | TSPAN18 | NM_130783    |
| 1040 | CSF2RA    | NM_172245    | 2304 | KCNC4  | NM_004978    | 3567 | RNF43   | NM_006913    | 4831 | TSPAN2  | NM_005725    |
| 1041 | CSF2RA    | NM_006140    | 2305 | KCND1  | NM_004979    | 3568 | RNF22   | BC011878     | 4832 | TSPAN3  | NM_005724    |
| 1042 | CSF2RA    | NM_172249    | 2306 | KCND2  | NM_012281    | 3569 | RNF22   | NM_001109903 | 4833 | TSPAN31 | NM_005981    |
| 1043 | CSF2RB    | NM_000395    | 2307 | KCND3  | NM_004980    | 3570 | ROBO2   | NM_001290039 | 4834 | TSPAN32 | NM_139022    |
| 1044 | CSF3R     | NM_156039    | 2308 | KCNE1  | BC036452     | 3571 | ROMO1   | NM_080748    | 4835 | TSPAN33 | NM_178562    |
| 1045 | CSF3R     | NM_000760    | 2309 | KCNE1  | NM_001127668 | 3572 | ROR1    | NM_005012    | 4836 | TSPAN4  | NM_003271    |
| 1046 | CSGALNAC1 | NM_018590    | 2310 | KCNE2  | NM_172201    | 3573 | ROR1    | NM_001083592 | 4837 | TSPAN4  | NM_001025238 |
| 1047 | CSPG4     | NM_001897    | 2311 | KCNE3  | BC032235     | 3574 | ROR2    | NM_004560    | 4838 | TSPAN4  | NM_003271    |
| 1048 | CSPG5     | NM_006574    | 2312 | KCNE4  | NM_080671    | 3575 | ROR2    | NM_004560    | 4839 | TSPAN5  | NM_005723    |
| 1049 | CST3      | NM_000099    | 2313 | KCNE5  | NM_012282    | 3576 | RPN1    | NM_002950    | 4840 | TSPAN5  | NM_005723    |
| 1050 | CST9      | AF494536     | 2314 | KCNF1  | NM_002236    | 3577 | RPN1    | NM_002950    | 4841 | TSPAN6  | NM_003270    |
| 1051 | CST9L     | NM_080610    | 2315 | KCNG1  | NM_002237    | 3578 | RPN2    | NM_002951    | 4842 | TSPAN6  | NM_003270    |
| 1052 | CT83      | NM_001017978 | 2316 | KCNG2  | NM_012283    | 3579 | RPN2    | NM_002951    | 4843 | TSPAN7  | NM_004615    |
| 1053 | CT83      | NM_001017978 | 2317 | KCNG2  | NM_012283    | 3580 | RPRM    | NM_019845    | 4844 | TSPAN8  | NM_004616    |
| 1054 | CTAGE5    | NM_005930    | 2318 | KCNG3  | NM_172344    | 3581 | RRBP1   | NM_004587    | 4845 | TSPAN9  | NM_006675    |
| 1055 | CTDNEP1   | NM_015343    | 2319 | KCNG4  | NM_172347    | 3582 | RRH     | NM_006583    | 4846 | TSPO    | NM_001256530 |
| 1056 | CTLA4     | NM_001037631 | 2320 | KCNH1  | NM_002238    | 3583 | RRM2B   | NM_015713    | 4847 | TSPO    | NM_000714    |
| 1057 | CTLA4     | NM_005214    | 2321 | KCNH2  | NM_172057    | 3584 | RTN1    | NM_206852    | 4848 | TTC13   | NM_024525    |
| 1058 | CTNS      | NM_004937    | 2322 | KCNH2  | NM_172056    | 3585 | RTN1    | NM_021136    | 4849 | TTYH1   | NM_001005367 |
| 1059 | CTRB1     | NM_001906    | 2323 | KCNH2  | NM_000238    | 3586 | RTN2    | NM_206901    | 4850 | TTYH1   | NM_020659    |
| 1060 | CTXN3     | NM_001048252 | 2324 | KCNH3  | NM_012284    | 3587 | RTN2    | NM_005619    | 4851 | TTYH1   | BC019358     |
| 1061 | CUTA      | NM_001014838 | 2325 | KCNH4  | NM_012285    | 3588 | RTN3    | NM_201430    | 4852 | TTYH2   | NM_032646    |
| 1062 | CUTA      | NM_015921    | 2326 | KCNH6  | BC006334     | 3589 | RTN3    | NM_006054    | 4853 | TUSC3   | NM_178234    |
| 1063 | CUX1      | NM_001913    | 2327 | KCNH6  | NM_030779    | 3590 | RTN4    | NM_007008    | 4854 | TUSC3   | NM_006765    |
| 1064 | CUZD1     | NM_022034    | 2328 | KCNH6  | NM_173092    | 3591 | RTN4    | NM_153828    | 4855 | TVP23B  | NM_016078    |
| 1065 | CWH43     | NM_0025087   | 2329 | KCNH7  | NM_173162    | 3592 | RTN4    | NM_207520    | 4856 | TVP23C  | NM_145301    |
| 1066 | CX3CL1    | NM_002996    | 2330 | KCNIP3 | NM_013434    | 3593 | RTN4    | NM_020532    | 4857 | TVP23C  | NM_145301    |
| 1067 | CX3CR1    | NM_001337    | 2331 | KCNIP3 | NM_001034914 | 3594 | RTP2    | NM_001004312 | 4858 | TXNDC12 | NM_015913    |
| 1068 | CX3CR1    | NM_001171714 | 2332 | KCNJ1  | NM_153767    | 3595 | RTP3    | NM_031440    | 4859 | TXNDC15 | NM_024715    |
| 1069 | CXADR     | NM_001338    | 2333 | KCNJ1  | NM_000220    | 3596 | RXFP1   | NM_021634    | 4860 | TYR     | BC027179     |
| 1070 | CXADR     | NM_001338    | 2334 | KCNJ1  | NM_153764    | 3597 | RXFP1   | NM_001253730 | 4861 | TYR     | NM_000372    |
| 1071 | CXCL10    | NM_001565    | 2335 | KCNJ10 | NM_002241    | 3598 | RXFP2   | NM_130806    | 4862 | TYROBP  | NM_198125    |
| 1072 | CXCL11    | NM_005409    | 2336 | KCNJ11 | NM_000525    | 3599 | RXFP3   | NM_016568    | 4863 | TYROBP  | NM_003332    |
| 1073 | CXCL14    | NM_004887    | 2337 | KCNJ12 | NM_021012    | 3600 | RXFP4   | NM_181885    | 4864 | TYRP1   | NM_000550    |
| 1074 | CXCL16    | NM_022059    | 2338 | KCNJ13 | NM_002242    | 3601 | RYK     | NM_002958    | 4865 | TYW1    | NM_018264    |
| 1075 | CXCL16    | NM_022059    | 2339 | KCNJ13 | NM_002242    | 3602 | RYK     | NM_001005861 | 4866 | TYW1    | NM_037744    |
| 1076 | CXCL8     | NM_000584    | 2340 | KCNJ14 | NM_170720    | 3603 | RYK     | NM_002958    | 4867 | UBA5    | NM_024818    |
| 1077 | CXCL9     | NM_002416    | 2341 | KCNJ15 | NM_002243    | 3604 | S100A10 | NM_002966    | 4868 | UBA5    | NM_024818    |
| 1078 | CXCR1     | NM_000634    | 2342 | KCNJ15 | NM_170736    | 3605 | S1PR1   | NM_001400    | 4869 | UBA5    | NM_198329    |
| 1079 | CXCR2     | NM_001557    | 2343 | KCNJ16 | NM_018658    | 3606 | S1PR2   | NM_004230    | 4870 | UBAC2   | NM_001144072 |
| 1080 | CXCR2     | NM_001168298 | 2344 | KCNJ16 | NM_018658    | 3607 | S1PR3   | NM_005226    | 4871 | UBE2J1  | NM_016021    |
| 1081 | CXCR2     | NM_115806    | 2345 | KCNJ16 | NM_001270422 | 3608 | S1PR4   | NM_003775    | 4872 | UBE2J1  | NM_016021    |
| 1082 | CXCR3     | NM_001142797 | 2346 | KCNJ2  | NM_000891    | 3609 | S1PR4   | NM_003775    | 4873 | UBE2J2  | AF296658     |
| 1083 | CXCR3     | NM_001504    | 2347 | KCNJ3  | NM_002239    | 3610 | S1PR5   | NM_030760    | 4874 | UBE2J2  | NM_194457    |
| 1084 | CXCR4     | NM_001008540 | 2348 | KCNJ4  | NM_152868    | 3611 | SACM1L  | NM_014016    | 4875 | UBIAD1  | NM_013319    |
| 1085 | CXCR4     | NM_003467    | 2349 | KCNJ4  | NM_004981    | 3612 | SARAF   | NM_016127    | 4876 | UBXN8   | NM_005671    |
| 1086 | CXCR5     | NM_032966    | 2350 | KCNJ5  | NM_000980    | 3613 | SARAF   | NM_016127    | 4877 | UBXN8   | BC020694     |
| 1087 | CXCR5     | NM_001716    | 2351 | KCNJ6  | NM_002240    | 3614 | SAYS1D1 | NM_018322    | 4878 | UCN2    | NM_033199    |
| 1088 | CXCR6     | NM_006564    | 2352 | KCNJ8  | NM_004982    | 3615 | SC5D    | NM_001024956 | 4879 | UGCG    | NM_003358    |
| 1089 | CYB5E1    | NM_001915    | 2353 | KCNJ8  | NM_004982    | 3616 | SC5D    | NM_006918    | 4880 | UGT1A1  | NM_000463    |
| 1090 | CYB5E1D2  | NM_007022    | 2354 | KCNJ9  | NM_004983    | 3617 | SCAMP1  | NM_004866    | 4881 | UGT1A10 | NM_019075    |
| 1091 | CYB5A     | AK026310     | 2355 | KCNK10 | NM_138317    | 3618 | SCAMP2  | NM_005697    | 4882 | UGT1A4  | NM_007120    |
| 1092 | CYB5A     | NM_148923    | 2356 | KCNK10 | NM_138318    | 3619 | SCAMP3  | NM_052837    | 4883 | UGT1A6  | NM_205862    |
| 1093 | CYB5A     | NM_001914    | 2357 | KCNK10 | NM_021161    | 3620 | SCAMP3  | NM_052837    | 4884 | UGT1A6  | NM_001072    |
| 1094 | CYB5B     | NM_030579    | 2358 | KCNK12 | NM_022055    | 3621 | SCAMP3  | NM_005698    | 4885 | UGT1A7  | NM_019077    |
| 1095 | CYB5D2    | NM_144611    | 2359 | KCNK13 | NM_022054    | 3622 | SCAP    | NM_012235    | 4886 | UGT1A9  | NM_021027    |
| 1096 | CYB5D2    | NM_144611    | 2360 | KCNK15 | NM_022358    | 3623 | SCARA3  | NM_182826    | 4887 | UGT2B10 | NM_001144767 |
| 1097 | CYB5R1    | NM_016243    | 2361 | KCNK16 | NM_032115    | 3624 | SCARA3  | NM_016240    | 4888 | UGT2B10 | NM_001075    |
| 1098 | CYBA      | NM_000101    | 2362 | KCNK16 | NM_001135106 | 3625 | SCARA5  | NM_173833    | 4889 | UGT2B15 | NM_001076    |
| 1099 | CYBB      | NM_000397    | 2363 | KCNK17 | NM_031460    | 3626 | SCARB1  | NM_005505    | 4890 | UGT2B15 | NM_001076    |
| 1100 | CYBRD1    | NM_024843    | 2364 | KCNK18 | NM_181840    | 3627 | SCARB2  | NM_005506    | 4891 | UGT2B4  | NM_021139    |
| 1101 | CYHR1     | NM_032687    | 2365 | KCNK2  | NM_001017425 | 3628 | SCARB2  | NM_005506    | 4892 | UGT2B7  | NM_001074    |
| 1102 | CYP1A1    | NM_000499    | 2366 | KCNK2  | NM_001017424 | 3629 | SCCPDH  | NM_016002    | 4893 | UGT3A2  | NM_174914    |
| 1103 | CYP1A1    | NM_000499    | 2367 | KCNK2  | NM_014217    | 3630 | SCD     | NM_005063    | 4894 | ULBP1   | NM_025218    |
| 1104 | CYP1A2    | NM_000761    | 2368 | KCNK3  | NM_002246    | 3631 | SCD5    | NM_001037582 | 4895 | ULBP2   | NM_025217    |
| 1105 | CYP20A1   | NM_177538    | 2369 | KCNK4  | NM_033310    | 3632 | SCD5    | NM_024906    | 4896 | UNC50   | NM_014044    |
| 1106 | CYP26A1   | NM_000783    | 2370 | KCNK5  | NM_003740    | 3633 | SCD5    | AL831891     | 4897 | UNC5A   | NM_133369    |
| 1107 | CYP26C1   | NM_183374    | 2371 | KCNK6  | NM_004823    | 3634 | SCG2    | NM_003469    | 4898 | UNC5B   | NM_170744    |
| 1108 | CYP2A6    | NM_000762    | 2372 | KCNK7  | NM_033347    | 3635 | SCIMP   | BC029580     | 4899 | UNC5B   | AK094595     |
| 1109 | CYP2A6    | NM_000762    | 2373 | KCNK9  | NM_016601    | 3636 | SCIMP   | NM_207103    | 4900 | UNC5C   | NM_003728    |
| 1110 | CYP2A7    | NM_000764    | 2374 | KCNMA1 | NM_002247    | 3637 | SCN10A  | NM_006514    | 4901 | UNC93B1 | NM_030930    |
| 1111 | CYP2A7    | NM_030589    | 2375 | KCNMA1 | NM_002247    | 3638 | SCN11A  | NM_014139    | 4902 | UPK1A   | BC007817     |
| 1112 | CYP2C8    | NM_000770    | 2376 | KCNMA1 | NM_001014797 | 3639 | SCN1A   | NM_001165963 | 4903 | UPK1A   | NM_007000    |
| 1113 | CYP2D6    | NM_000106    | 2377 | KCNMB1 | NM_004137    | 3640 | SCN1B   | NM_199037    | 4904 | UPK1B   | NM_006952    |
| 1114 | CYP2D6    | NM_001025161 | 2378 | KCNMB2 | NM_005832    | 3641 | SCN1B   | NM_001037    | 4905 | UPK2    | NM_006760    |
| 1115 | CYP2E1    | NM_000773    | 2379 | KCNMB3 | NM_171829    | 3642 | SCN2A   | NM_001040143 | 4906 | UPK3A   | NM_006953    |

|      |          |              |      |           |              |      |           |              |      |         |              |
|------|----------|--------------|------|-----------|--------------|------|-----------|--------------|------|---------|--------------|
| 1116 | CYP2F1   | NM_000774    | 2380 | KCNMB3    | NM_171828    | 3643 | SCN2A     | NM_021007    | 4907 | UPK3A   | NM_001167574 |
| 1117 | CYP2F1   | NM_000774    | 2381 | KCNMB4    | NM_014505    | 3644 | SCN2B     | NM_004588    | 4908 | UPK3B   | NM_030570    |
| 1118 | CYP2J2   | NM_000775    | 2382 | KCNN1     | NM_002248    | 3645 | SCN3A     | NM_001081677 | 4909 | UQCR10  | NM_013387    |
| 1119 | CYP2R1   | NM_024514    | 2383 | KCNN2     | NM_170775    | 3646 | SCN3B     | NM_018400    | 4910 | UQCR11  | NM_006830    |
| 1120 | CYP2U1   | NM_183075    | 2384 | KCNN2     | NM_021614    | 3647 | SCN3B     | NM_018400    | 4911 | USE1    | NM_018467    |
| 1121 | CYP39A1  | NM_016593    | 2385 | KCNN2     | NM_021614    | 3648 | SCN4A     | NM_000334    | 4912 | USE1    | NM_018467    |
| 1122 | CYP39A1  | NM_016593    | 2386 | KCNN3     | NM_170782    | 3649 | SCN4B     | NM_174934    | 4913 | USMG5   | NM_032747    |
| 1123 | CYP3A4   | NM_017460    | 2387 | KCNN4     | NM_002250    | 3650 | SCN4B     | NM_001142349 | 4914 | USMG5   | NM_001206426 |
| 1124 | CYP3A43  | NM_022820    | 2388 | KCNN4     | NM_002250    | 3651 | SCN4B     | NM_001142348 | 4915 | USP19   | NM_006677    |
| 1125 | CYP3A5   | NM_000777    | 2389 | KCNQ1     | NM_000218    | 3652 | SCN5A     | NM_000335    | 4916 | USP30   | NM_032663    |
| 1126 | CYP3A7   | NM_000765    | 2390 | KCNQ2     | NM_172109    | 3653 | SCN5A     | NM_198056    | 4917 | USP30   | NM_032663    |
| 1127 | CYP4A11  | NM_000778    | 2391 | KCNQ2     | NM_172109    | 3654 | SCN7A     | NM_002976    | 4918 | USP48   | NM_032236    |
| 1128 | CYP4A11  | NM_000778    | 2392 | KCNQ3     | NM_004519    | 3655 | SCNN1A    | NM_001038    | 4919 | UST     | NM_005715    |
| 1129 | CYP4B1   | NM_000779    | 2393 | KCNQ4     | NM_172163    | 3656 | SCNN1A    | NM_001038    | 4920 | UTS2R   | NM_018949    |
| 1130 | CYP4B1   | NM_001099772 | 2394 | KCNQ4     | NM_004700    | 3657 | SCNN1A    | NM_001159576 | 4921 | UTY     | NM_007125    |
| 1131 | CYP4F11  | BC016853     | 2395 | KCNQ5     | NM_019842    | 3658 | SCNN1B    | NM_000336    | 4922 | UTY     | NM_182660    |
| 1132 | CYP4F11  | NM_021187    | 2396 | KCNQ5     | NM_001160130 | 3659 | SCNN1D    | NM_002978    | 4923 | UXS1    | NM_025076    |
| 1133 | CYP4F12  | NM_023944    | 2397 | KCN51     | NM_002251    | 3660 | SCNN1D    | NM_001130413 | 4924 | UXS1    | BC009819     |
| 1134 | CYP4F2   | NM_001082    | 2398 | KCNS3     | NM_002252    | 3661 | SCNN1D    | NM_002978    | 4925 | VAMP1   | NM_014231    |
| 1135 | CYP4F22  | NM_173483    | 2399 | KCNS3     | NM_002252    | 3662 | SCNN1D    | NM_002978    | 4926 | VAMP3   | NM_004781    |
| 1136 | CYP4F3   | NM_000896    | 2400 | KCNT1     | NM_020822    | 3663 | SCNN1G    | NM_001039    | 4927 | VAMP4   | NM_003762    |
| 1137 | CYP4F8   | NM_007253    | 2401 | KCNT2     | NM_198503    | 3664 | SCRG1     | NM_007281    | 4928 | VAMP5   | NM_006634    |
| 1138 | CYP4F8   | NM_007253    | 2402 | KCNV1     | NM_014379    | 3665 | SCTR      | NM_002980    | 4929 | VAMP7   | NM_005638    |
| 1139 | CYP4V2   | BC014218     | 2403 | KCNV2     | NM_133497    | 3666 | SCUBE2    | NM_020974    | 4930 | VAMP8   | NM_003761    |
| 1140 | CYP4V2   | NM_207352    | 2404 | KDEL1     | NM_006801    | 3667 | SDC1      | NM_002997    | 4931 | VANGL1  | NM_138959    |
| 1141 | CYP4X1   | NM_178033    | 2405 | KDEL2     | NM_006854    | 3668 | SDC1      | NM_001006946 | 4932 | VANGL1  | NM_138959    |
| 1142 | CYP4X1   | NM_178033    | 2406 | KDEL3     | NM_006855    | 3669 | SDC2      | NM_002998    | 4933 | VANGL2  | NM_020335    |
| 1143 | CYP4Z1   | NM_178134    | 2407 | KDEL3     | NM_016657    | 3670 | SDC3      | BC013974     | 4934 | VAPA    | NM_194434    |
| 1144 | CYP51A1  | NM_000786    | 2408 | KDR       | NM_002253    | 3671 | SDC3      | NM_014654    | 4935 | VAPA    | NM_194434    |
| 1145 | CYP51A1  | NM_000786    | 2409 | KDR       | NM_002253    | 3672 | SDC4      | NM_002999    | 4936 | VAPA    | NM_003574    |
| 1146 | CYP7A1   | NM_000780    | 2410 | KDSR      | NM_002035    | 3673 | SDCBP     | NM_005625    | 4937 | VAPB    | NM_004738    |
| 1147 | CYP7B1   | NM_004820    | 2411 | KEL       | NM_000420    | 3674 | SDF2L1    | NM_022044    | 4938 | VCAM1   | NM_001078    |
| 1148 | CYP8B1   | NM_004391    | 2412 | KHDC1     | NM_030568    | 3675 | SDF4      | NM_016176    | 4939 | VEZT    | NM_017599    |
| 1149 | CYSLTR1  | NM_001282187 | 2413 | KHDC1     | NM_030568    | 3676 | SDF4      | NM_016547    | 4940 | VIP     | NM_003381    |
| 1150 | CYSLTR1  | NM_006639    | 2414 | KHDC1     | NM_001251874 | 3677 | SDHC      | NM_003001    | 4941 | VIP     | NM_194435    |
| 1151 | CYSLTR2  | NM_020377    | 2415 | KIAA0317  | NM_014821    | 3678 | SDHC      | NM_001035511 | 4942 | VIP     | NM_003381    |
| 1152 | CYYR1    | NM_052954    | 2416 | KIAA0319  | NM_001252328 | 3679 | SDR42E1   | NM_145168    | 4943 | VIPR1   | NM_004624    |
| 1153 | DAD1     | NM_001344    | 2417 | KIAA0319L | AK097107     | 3680 | SEC11A    | NM_014300    | 4944 | VIPR1   | NM_004624    |
| 1154 | DAG1     | NM_004393    | 2418 | KIAA0319L | NM_024874    | 3681 | SEC11A    | NM_014300    | 4945 | VIPR1   | NM_004624    |
| 1155 | DAGLA    | NM_006133    | 2419 | KIAA1324  | NM_002075    | 3682 | SEC11C    | NM_033280    | 4946 | VIPR2   | NM_003382    |
| 1156 | DBH      | NM_000787    | 2420 | KIAA1644  | AK090955     | 3683 | SEC22A    | NM_012430    | 4947 | VKORC1  | NM_206824    |
| 1157 | DBH      | NM_000787    | 2421 | KIAA1715  | NM_030650    | 3684 | SEC22A    | NM_012430    | 4948 | VKORC1  | NM_024006    |
| 1158 | DKAKD    | NM_024819    | 2422 | KIAA2013  | NM_138346    | 3685 | SEC22C    | NM_032970    | 4949 | VLDLR   | NM_003383    |
| 1159 | DCBLD2   | NM_080927    | 2423 | KIDINS220 | AK022873     | 3686 | SEC22C    | NM_004206    | 4950 | VMP1    | NM_030938    |
| 1160 | DCC      | NM_005215    | 2424 | KIDINS220 | NM_020738    | 3687 | SEC61A1   | NM_013336    | 4951 | VN1R1   | NM_020633    |
| 1161 | DCSTAMP  | NM_030788    | 2425 | KIR2DL1   | NM_014218    | 3688 | SEC61A2   | NM_018144    | 4952 | VN1R2   | NM_173856    |
| 1162 | DCT      | NM_001922    | 2426 | KIR2DL2   | NM_014219    | 3689 | SEC61B    | NM_006808    | 4953 | VNN3    | NM_018399    |
| 1163 | DDOST    | NM_005216    | 2427 | KIR2DL3   | NM_015868    | 3690 | SEC61G    | NM_014302    | 4954 | VRK2    | NM_006296    |
| 1164 | DDR1     | NM_001954    | 2428 | KIR2DL3   | NM_014511    | 3691 | SEC61G    | BC009480     | 4955 | VRK2    | NM_006296    |
| 1165 | DDR1     | NM_013993    | 2429 | KIR2DL4   | NM_002255    | 3692 | SEC62     | NM_003262    | 4956 | VSIG1   | NM_182607    |
| 1166 | DDR1     | NM_013994    | 2430 | KIR2DL5B  | NM_001018081 | 3693 | SEC63     | NM_007214    | 4957 | VSIG10  | NM_019086    |
| 1167 | DDR1     | NM_001954    | 2431 | KIR2DS1   | NM_014512    | 3694 | SECTM1    | NM_003004    | 4958 | VSIG2   | NM_014312    |
| 1168 | DDR2     | NM_006182    | 2432 | KIR2DS2   | NM_012312    | 3695 | SECTM1    | NM_003004    | 4959 | VSIG4   | NM_007268    |
| 1169 | DDR2     | NM_006182    | 2433 | KIR2DS3   | NM_012313    | 3696 | SEL1L3    | NM_015187    | 4960 | VSIG4   | NM_007268    |
| 1170 | DDR2     | NM_003935    | 2434 | KIR2DS4   | NM_012314    | 3697 | SELE      | NM_000450    | 4961 | VSTM2B  | NM_001146339 |
| 1171 | DEAF1    | NM_021008    | 2435 | KIR3DL1   | NM_013289    | 3698 | SELK      | NM_021237    | 4962 | VSTM5   | NM_001144871 |
| 1172 | DEFB103B | NM_018661    | 2436 | KIR3DL2   | NM_006737    | 3699 | SELL      | NM_000655    | 4963 | VTCN1   | NM_001253850 |
| 1173 | DEFB126  | NM_030931    | 2437 | KIR3DS1   | NM_001083539 | 3700 | SELP      | NM_003005    | 4964 | VTCN1   | NM_001253849 |
| 1174 | DEFB4A   | NM_004942    | 2438 | KIRREL    | NM_018240    | 3701 | SELPLG    | NM_003006    | 4965 | VTCN1   | NM_024626    |
| 1175 | DEGS1    | NM_144780    | 2439 | KIRREL2   | BC064925     | 3702 | SELPLG    | NM_003006    | 4966 | VT11A   | NM_145206    |
| 1176 | DEGS1    | NM_003676    | 2440 | KIRREL3   | NM_032531    | 3703 | SEMA3B    | NM_001005914 | 4967 | VT11B   | NM_006370    |
| 1177 | DEGS2    | NM_206918    | 2441 | KISS1R    | NM_032551    | 3704 | SEMA3B    | NM_004636    | 4968 | WBP1    | NM_012477    |
| 1178 | DERL1    | NM_024295    | 2442 | KIT       | NM_000222    | 3705 | SEMA4A    | NM_022367    | 4969 | WBP1    | XM_054495    |
| 1179 | DERL1    | NM_024295    | 2443 | KIT       | NM_000222    | 3706 | SEMA4A    | NM_022367    | 4970 | WBP1L   | NM_017787    |
| 1180 | DERL2    | NM_016041    | 2444 | KITLG     | NM_003994    | 3707 | SEMA4B    | NM_020210    | 4971 | WBSCR17 | NM_022479    |
| 1181 | DESI     | AK055529     | 2445 | KITLG     | NM_000899    | 3708 | SEMA4C    | NM_017789    | 4972 | WBSCR28 | NM_182504    |
| 1182 | DESI     | NM_014015    | 2446 | KL        | NM_004795    | 3709 | SEMA4D    | NM_006378    | 4973 | WDR83OS | NM_016145    |
| 1183 | DGAT1    | NM_012079    | 2447 | KL        | NM_153683    | 3710 | SEMA4D    | NM_006378    | 4974 | WFDC11  | NM_147197    |
| 1184 | DGAT2    | NM_032564    | 2448 | KLK       | NM_175737    | 3711 | SEMA4F    | NM_004263    | 4975 | WFDC2   | NM_080736    |
| 1185 | DGAT2    | NM_032564    | 2449 | KLK4      | NM_004917    | 3712 | SEMA4G    | NM_017893    | 4976 | WFDC2   | NM_080734    |
| 1186 | DGCR2    | NM_005137    | 2450 | KLK5      | NM_012427    | 3713 | SEMA5B    | BC002776     | 4977 | WFDC2   | NM_006103    |
| 1187 | DGKE     | NM_003647    | 2451 | KLK8      | NM_007196    | 3714 | SEMA5B    | NM_001031702 | 4978 | WFDC9   | NM_147198    |
| 1188 | DHCR24   | NM_014762    | 2452 | KLRB1     | NM_002258    | 3715 | SEMA6A    | NM_020796    | 4979 | WFIKK2  | NM_175575    |
| 1189 | DHCR7    | NM_001360    | 2453 | KLRC1     | NM_002259    | 3716 | SEMA6B    | NM_032108    | 4980 | WFS1    | NM_006005    |
| 1190 | DHODH    | NM_001361    | 2454 | KLRC1     | NM_007328    | 3717 | SEMA6D    | NM_020858    | 4981 | WLS     | NM_024911    |
| 1191 | DHODH    | NM_001361    | 2455 | KLRC1     | NM_213657    | 3718 | SERF1A    | NM_021967    | 4982 | WLS     | NM_024911    |
| 1192 | DHODH    | NM_001025193 | 2456 | KLRC1     | NM_213658    | 3719 | SERF1B    | NM_022978    | 4983 | WNT1    | NM_005430    |
| 1193 | DHRS11   | NM_024308    | 2457 | KLRC2     | NM_002260    | 3720 | SERINC1   | NM_020755    | 4984 | WNT10A  | NM_025216    |
| 1194 | DHRS7    | NM_016029    | 2458 | KLRC3     | NM_002261    | 3721 | SERINC2   | NM_178865    | 4985 | WNT11   | NM_004626    |
| 1195 | DHRS7B   | NM_015510    | 2459 | KLRC4     | NM_013431    | 3722 | SERINC3   | NM_198941    | 4986 | WNT3    | NM_030753    |
| 1196 | DIABLO   | NM_019887    | 2460 | KLRD1     | NM_002262    | 3723 | SERINC3   | NM_006811    | 4987 | WNT3    | NM_030753    |
| 1197 | DIABLO   | NM_138929    | 2461 | KLRD1     | BC028009     | 3724 | SERP1     | NM_014445    | 4988 | WNT3    | NM_030753    |
| 1198 | DIO1     | NM_000792    | 2462 | KLRD1     | NM_001114396 | 3725 | SERP2     | BC029067     | 4989 | WNT4    | NM_030761    |
| 1199 | DIRC2    | NM_032839    | 2463 | KLRG2     | NM_198508    | 3726 | SERPINB13 | NM_012397    | 4990 | WNT6    | NM_006522    |
| 1200 | DIRC2    | NM_032839    | 2464 | KLRK1     | NM_007360    | 3727 | SEZ6L     | NM_021115    | 4991 | WNT7A   | NM_004625    |
| 1201 | DISP2    | NM_033510    | 2465 | KLRK1     | NM_007360    | 3728 | SEZ6L     | NM_021115    | 4992 | WNT7B   | NM_058238    |
| 1202 | DKKL1    | NM_014419    | 2466 | KREMEN1   | NM_001039571 | 3729 | SEZ6L2    | NM_012410    | 4993 | WNT9A   | NM_003395    |
| 1203 | DLK1     | NM_003836    | 2467 | KREMEN2   | NM_172229    | 3730 | SFRP1     | NM_003012    | 4994 | WNT9B   | NM_003396    |
| 1204 | DLK1     | NM_003836    | 2468 | KRTCAP2   | NM_173852    | 3731 | SFT2D1    | NM_145169    | 4995 | WNT9B   | NM_003396    |
| 1205 | DLK2     | NM_023932    | 2469 | KRTCAP2   | NM_173852    | 3732 | SFT2D2    | NM_199344    | 4996 | WNT9B   | NM_003396    |
| 1206 | DLK2     | BC006425     | 2470 | L1CAM     | NM_000425    | 3733 | SFTPC     | NM_003018    | 4997 | XCR1    | NM_005283    |
| 1207 | DLL1     | NM_005618    | 2471 | LAG3      | NM_002286    | 3734 | SFXN1     | NM_022754    | 4998 | XG      | NM_175569    |
| 1208 | DLL3     | NM_203486    | 2472 | LAIR1     | NM_002287    | 3735 | SFXN2     | NM_178858    | 4999 | XK      | NM_021083    |

|      |         |              |      |          |              |      |          |              |      |          |              |
|------|---------|--------------|------|----------|--------------|------|----------|--------------|------|----------|--------------|
| 1209 | DLL3    | NM_016941    | 2473 | LAMP1    | BC021288     | 3736 | SFXN2    | XM_058359    | 5000 | XKR8     | NM_018053    |
| 1210 | DLL4    | NM_019074    | 2474 | LAMP1    | NM_005561    | 3737 | SFXN3    | NM_030971    | 5001 | XPR1     | NM_001135669 |
| 1211 | DMRT2   | NM_006557    | 2475 | LAMP2    | NM_013995    | 3738 | SFXN4    | NM_213649    | 5002 | XPR1     | NM_004736    |
| 1212 | DMRT2   | NM_181872    | 2476 | LAMP2    | NM_001122606 | 3739 | SGCA     | NM_000023    | 5003 | XXYLT1   | NM_152531    |
| 1213 | DNAJB11 | NM_016306    | 2477 | LAMP2    | NM_002294    | 3740 | SGCB     | NM_000232    | 5004 | XXYLT1   | NM_152531    |
| 1214 | DNAJB12 | NM_001002762 | 2478 | LAMP3    | NM_014398    | 3741 | SGCD     | NM_000337    | 5005 | XYLT1    | NM_022166    |
| 1215 | DNAJB12 | NM_017626    | 2479 | LAPTM4A  | NM_014713    | 3742 | SGCE     | NM_003919    | 5006 | XYLT2    | NM_022167    |
| 1216 | DNAJB9  | NM_012328    | 2480 | LAPTM4B  | NM_018407    | 3743 | SGCE     | NM_001099401 | 5007 | YIF1A    | NM_020470    |
| 1217 | DNAJB9  | NM_012328    | 2481 | LAPTM5   | NM_006762    | 3744 | SGMS1    | NM_147156    | 5008 | YIF1A    | NM_020470    |
| 1218 | DNAJC1  | NM_022365    | 2482 | LARGE    | NM_004737    | 3745 | SGMS2    | NM_152621    | 5009 | YIF1B    | BC025257     |
| 1219 | DNAJC1  | NM_022365    | 2483 | LARGE    | NM_133642    | 3746 | SGPP1    | NM_030791    | 5010 | YIF1B    | BC014974     |
| 1220 | DNAJC10 | NM_018981    | 2484 | LASS2    | NM_013384    | 3747 | SGPP1    | NM_030791    | 5011 | YIPF1    | NM_018982    |
| 1221 | DNAJC14 | BD025734     | 2485 | LASS3    | BC028703     | 3748 | SGPP2    | NM_152386    | 5012 | YIPF2    | NM_024029    |
| 1222 | DNAJC14 | BC002534     | 2486 | LAT      | NM_001014987 | 3749 | SHH      | NM_000193    | 5013 | YIPF2    | NM_024029    |
| 1223 | DNAJC14 | BC016941     | 2487 | LAT      | NM_014387    | 3750 | SHISA2   | XM_169407    | 5014 | YIPF3    | NM_015388    |
| 1224 | DNAJC15 | NM_013238    | 2488 | LAT2     | NM_014146    | 3751 | SHISA4   | NM_198149    | 5015 | YIPF4    | NM_032312    |
| 1225 | DNAJC16 | NM_015291    | 2489 | LAT2     | NM_022040    | 3752 | SHISA5   | NM_016479    | 5016 | YIPF5    | NM_030799    |
| 1226 | DNAJC19 | NM_145261    | 2490 | LAX1     | NM_017773    | 3753 | SI       | NM_001041    | 5017 | YIPF6    | NM_173834    |
| 1227 | DNAJC22 | NM_024902    | 2491 | LAYN     | AK096925     | 3754 | SIDT1    | NM_017699    | 5018 | YIPF6    | NM_173834    |
| 1228 | DNAJC25 | NM_001015882 | 2492 | LBR      | NM_194442    | 3755 | SIDT2    | NM_001040455 | 5019 | YIPF6    | BC012469     |
| 1229 | DNAJC30 | NM_032317    | 2493 | LBR      | NM_002296    | 3756 | SIGIRR   | NM_021805    | 5020 | ZACN     | NM_180990    |
| 1230 | DNAJC5  | NM_025219    | 2494 | LCAT     | NM_000229    | 3757 | SIGLEC1  | NM_023068    | 5021 | ZDHHHC11 | NM_024786    |
| 1231 | DNASE1  | NM_005223    | 2495 | LCAT     | NM_000229    | 3758 | SIGLEC10 | NM_033130    | 5022 | ZDHHHC12 | BC048251     |
| 1232 | DNER    | NM_139072    | 2496 | LCLAT1   | NM_182551    | 3759 | SIGLEC11 | NM_052884    | 5023 | ZDHHHC13 | NM_019028    |
| 1233 | DOLK    | NM_014908    | 2497 | LCTL     | NM_207338    | 3760 | SIGLEC15 | NM_213602    | 5024 | ZDHHHC14 | NM_153746    |
| 1234 | DOLK    | NM_014908    | 2498 | LDLR     | NM_000527    | 3761 | SIGLEC5  | NM_003830    | 5025 | ZDHHHC14 | NM_024630    |
| 1235 | DOLPP1  | NM_020438    | 2499 | LDLRAD3  | NM_174902    | 3762 | SIGLEC6  | NM_198845    | 5026 | ZDHHHC15 | NM_144969    |
| 1236 | DOLPP1  | NM_020438    | 2500 | LEMD2    | NM_181336    | 3763 | SIGLEC7  | NM_014385    | 5027 | ZDHHHC16 | AF258563     |
| 1237 | DPAGT1  | NM_001382    | 2501 | LEMD3    | NM_014319    | 3764 | SIGLEC9  | NM_014441    | 5028 | ZDHHHC16 | NM_198046    |
| 1238 | DPAGT1  | NM_203316    | 2502 | LEPR     | NM_002303    | 3765 | SIGMAR1  | NM_005866    | 5029 | ZDHHHC16 | NM_198044    |
| 1239 | DPM2    | NM_003863    | 2503 | LEPROT   | NM_017526    | 3766 | SIGMAR1  | NM_147157    | 5030 | ZDHHHC16 | NM_198045    |
| 1240 | DPM3    | NM_018973    | 2504 | LEPROTL1 | NM_015344    | 3767 | SIL1     | NM_022464    | 5031 | ZDHHHC16 | BC012830     |
| 1241 | DPM3    | NM_153741    | 2505 | LETM1    | NM_012318    | 3768 | SIRPA    | NM_001040022 | 5032 | ZDHHHC16 | NM_032327    |
| 1242 | DPP10   | NM_020868    | 2506 | LETM1    | NM_012318    | 3769 | SIRPA    | BC026692     | 5033 | ZDHHHC17 | NM_015336    |
| 1243 | DPP10   | NM_020868    | 2507 | LETMD1   | NM_015416    | 3770 | SIRPA    | NM_080792    | 5034 | ZDHHHC2  | NM_016353    |
| 1244 | DPP10   | NM_001004360 | 2508 | LGALS14  | NM_020129    | 3771 | SIRPB1   | NM_001083910 | 5035 | ZDHHHC21 | AK096860     |
| 1245 | DPP4    | NM_001935    | 2509 | LGALS14  | NM_203471    | 3772 | SIRPB1   | NM_001135844 | 5036 | ZDHHHC21 | NM_178566    |
| 1246 | DPP6    | NM_130797    | 2510 | LGI2     | NM_018176    | 3773 | SIRPB1   | NM_006065    | 5037 | ZDHHHC21 | XM_088548    |
| 1247 | DPP6    | NM_130797    | 2511 | LGR4     | NM_018490    | 3774 | SIRPB2   | AK095499     | 5038 | ZDHHHC23 | NM_173570    |
| 1248 | DPP6    | NM_001039350 | 2512 | LGR5     | NM_003667    | 3775 | SIRPG    | NM_080816    | 5039 | ZDHHHC3  | NM_001135179 |
| 1249 | DPP6    | NM_001936    | 2513 | LGR6     | NM_001017403 | 3776 | SLAMF1   | NM_003037    | 5040 | ZDHHHC4  | NM_018106    |
| 1250 | DPP8    | NM_197960    | 2514 | LGR6     | NM_021636    | 3777 | SLAMF6   | NM_052931    | 5041 | ZDHHHC4  | NM_018106    |
| 1251 | DPP8    | NM_130434    | 2515 | LGR6     | NM_001017404 | 3778 | SLAMF6   | NM_001184714 | 5042 | ZDHHHC5  | XM_052908    |
| 1252 | DPP8    | NM_197961    | 2516 | LHFP     | NM_005780    | 3779 | SLAMF7   | NM_021181    | 5043 | ZDHHHC6  | NM_022494    |
| 1253 | DPP8    | NM_197960    | 2517 | LHFPL4   | NM_198560    | 3780 | SLAMF8   | NM_020125    | 5044 | ZDHHHC7  | NM_017740    |
| 1254 | DRAM1   | NM_018370    | 2518 | LHFPL5   | NM_182548    | 3781 | SLC10A1  | NM_003049    | 5045 | ZDHHHC8  | NM_013373    |
| 1255 | DRAM1   | NM_018370    | 2519 | LIFR     | NM_002310    | 3782 | SLC10A2  | NM_000452    | 5046 | ZDHHHC9  | NM_016032    |
| 1256 | DRAM2   | AK092961     | 2520 | LILRB1   | NM_001081639 | 3783 | SLC10A3  | NM_019848    | 5047 | ZFPL1    | NM_006782    |
| 1257 | DRAM2   | NM_178454    | 2521 | LILRB1   | NM_006669    | 3784 | SLC10A4  | NM_152679    | 5048 | ZFYVE27  | NM_144588    |
| 1258 | DRD1    | NM_000794    | 2522 | LILRB1   | NM_001081638 | 3785 | SLC11A1  | NM_000578    | 5049 | ZMPSTE24 | NM_005857    |
| 1259 | DRD2    | NM_000795    | 2523 | LILRB1   | NM_001081637 | 3786 | SLC11A2  | NM_000617    | 5050 | ZNRF3    | NM_032173    |
| 1260 | DRD2    | BC021195     | 2524 | LILRB2   | NM_005874    | 3787 | SLC12A1  | NM_000338    | 5051 | ZNRF4    | NM_181710    |
| 1261 | DRD2    | NM_016574    | 2525 | LILRB2   | NM_001080978 | 3788 | SLC12A2  | NM_001046    | 5052 | ZP3      | NM_007155    |
| 1262 | DRD3    | NM_000796    | 2526 | LILRB3   | NM_001081450 | 3789 | SLC12A4  | NM_005072    | 5053 | ZP3      | NM_001110354 |
| 1263 | DRD3    | NM_000796    | 2527 | LILRB3   | NM_006864    | 3790 | SLC12A5  | NM_020708    | 5054 | ZP4      | NM_021186    |
| 1264 | DRD3    | NM_033663    |      |          |              | 3791 | SLC12A6  | NM_133647    |      |          |              |
