# Supplementary material
Source: PubMed Central journal article supplement (PMC8724283)
Supplement: 41422_2021_595_MOESM14_ESM.pdf [file 41422_2021_595_MOESM14_ESM.pdf]

**Table S2. Targeting sequences and oligoes used in this study.**

| Name                            | Sequences                                               |
|---------------------------------|---------------------------------------------------------|
| ACE2 sgRNA targeting sequence   | CTTGGCCTGTTCTCAATGGTGG                                  |
| shACE2-1, targeting sequence    | GCAACGGTGTATCCTAGTTCT                                   |
| shACE2-2, targeting sequence    | GAAAGCTAGGTGGACCAGTAT                                   |
| shASGR1-1, targeting sequence   | GTCCTGGGAGGAGCAGAAATT                                   |
| shASGR1-2, targeting sequence   | GAAGGTGAGGAGCTTGAAACC                                   |
| shKREMEN1-1, targeting sequence | GGACCTTAGGGATTGTCATCA                                   |
| shKREMEN1-2, targeting sequence | GCTTCATCGATTGCACCTTAGG                                  |
| qPCR, ACE2-For                  | 5'-CGAAGCCGAAGACCTGTTCTA-3'                             |
| qPCR, ACE2-Rev                  | 5'-GGGCAAGTGTGGACTGTTCC-3'                              |
| qPCR, KRM1-For                  | 5'-ACTGTGAGATACCTGCTTGCC-3'                             |
| qPCR, KRM1-Rev                  | 5'-GTTGGACGTTTTACTGGTGCC-3'                             |
| qPCR, ASGR1-For                 | 5'-GAGAGAGACGTTTCAGCAACTTC-3'                           |
| qPCR, ASGR1-Rev                 | 5'-GGGACTCTAGCGACTTCATCTT-3'                            |
| qPCR, GAPDH-For                 | 5'-ACAACCTTGGTATCGTGGAAGG-3'                            |
| qPCR, GAPDH-Rev                 | 5'-GCCATCACGCCACAGTTTC-3'                               |
| SARS-CoV-2-N-F                  | 5'-GGGGAACCTTCTCCTGCTAGAAT-3'                           |
| SARS-CoV-2-N-R                  | 5'-CAGACATTTTGCTCTCAAGCTG-3'                            |
| SARS-CoV-2-N-probe              | 5'-FAM- TTGCTGCTGCTTGACAGATT-TAMRA-3'.                  |
| SARS-CoV-2-ORF1ab-F             | 5'-GAAAATAGGACCTGAGCGCACC-3'                            |
| SARS-CoV-2-ORF1ab -R            | 5'-TGACAATACAGATCATGGTTGCTTTGT-3'                       |
| SARS-CoV-2-ORF1ab-probe         | 5'-FAM-TAGACGTGCCACATGCTTTTCCACTGCTTCAGAC -<br>BHQ1-3'. |
