# Supplementary material
Source: PubMed Central journal article supplement (PMC8724283)

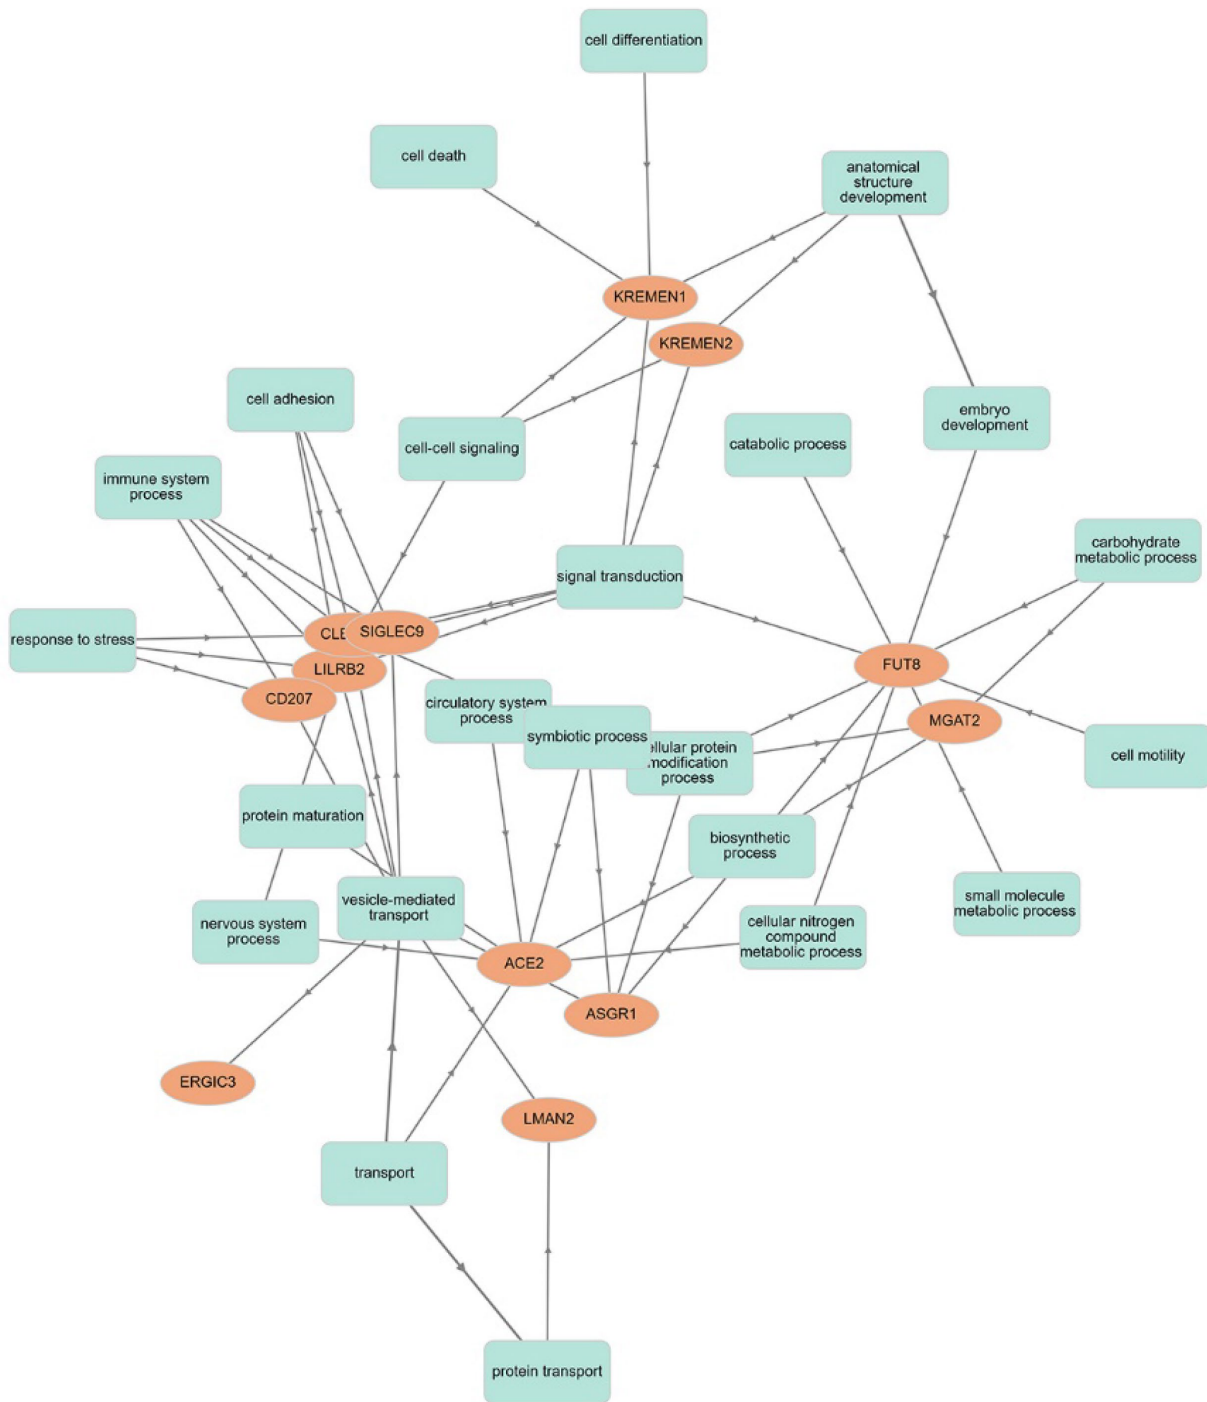

**Fig. S3. Biological functions of the twelve SARS-CoV-2 S-binding host factors.**

Supplement: 41422_2021_595_MOESM3_ESM.pdf [file 41422_2021_595_MOESM3_ESM.pdf]
